# Supplementary material for: Prevalence of lifestyle characteristics in glucocorticoid users and non-users: a Danish population-based cross-sectional study
Source: PubMed Central journal article supplement — BMJ Open. 2019 Oct 28;9(10):e030780. doi: 10.1136/bmjopen-2019-030780 (PMC6830647; doi:10.1136/bmjopen-2019-030780), 2019-10-28
Supplement: bmjopen-2019-030780.draft_revisions.pdf [file bmjopen-2019-030780.draft_revisions.pdf]

# BMJ Open

BMJ Open is committed to open peer review. As part of this commitment we make the peer review history of every article we publish publicly available.

When an article is published we post the peer reviewers' comments and the authors' responses online. We also post the versions of the paper that were used during peer review. These are the versions that the peer review comments apply to.

The versions of the paper that follow are the versions that were submitted during the peer review process. They are not the versions of record or the final published versions. They should not be cited or distributed as the published version of this manuscript.

BMJ Open is an open access journal and the full, final, typeset and author-corrected version of record of the manuscript is available on our site with no access controls, subscription charges or pay-per-view fees (<http://bmjopen.bmj.com>).

If you have any questions on BMJ Open's open peer review process please email [info.bmjopen@bmj.com](mailto:info.bmjopen@bmj.com)

# BMJ Open

## Use of systemic glucocorticoids and lifestyle: A Danish population-based cross-sectional study

|                               |                                                                                                                                                                                                                                                                                                                                                                                                                                                                                                                                                                               |
|-------------------------------|-------------------------------------------------------------------------------------------------------------------------------------------------------------------------------------------------------------------------------------------------------------------------------------------------------------------------------------------------------------------------------------------------------------------------------------------------------------------------------------------------------------------------------------------------------------------------------|
| Journal:                      | <i>BMJ Open</i>                                                                                                                                                                                                                                                                                                                                                                                                                                                                                                                                                               |
| Manuscript ID                 | bmjopen-2019-030780                                                                                                                                                                                                                                                                                                                                                                                                                                                                                                                                                           |
| Article Type:                 | Research                                                                                                                                                                                                                                                                                                                                                                                                                                                                                                                                                                      |
| Date Submitted by the Author: | 01-Apr-2019                                                                                                                                                                                                                                                                                                                                                                                                                                                                                                                                                                   |
| Complete List of Authors:     | Laugesen, Kristina; Aarhus University Hospital, Department of Clinical Epidemiology<br>Petersen, Irene; University College London Medical School, Department of Primary Care and Population health<br>Pedersen, Lars; Aarhus University Hospital, Department of Clinical Epidemiology<br>Breinholt Larsen, Finn; Public Health and Quality Improvement, Central Denmark Region<br>Jørgensen, Jens Otto; Aarhus University Hospital, Department of Endocrinology and Internal Medicine<br>Sørensen, Henrik T.; Aarhus University Hospital, Department of Clinical Epidemiology |
| Keywords:                     | glucocorticoids, smoking, alcohol drinking, exercise, body mass index, EPIDEMIOLOGY                                                                                                                                                                                                                                                                                                                                                                                                                                                                                           |
|                               |                                                                                                                                                                                                                                                                                                                                                                                                                                                                                                                                                                               |

SCHOLARONE™  
Manuscripts

1  
2  
3 **Use of systemic glucocorticoids and lifestyle: A Danish population-based cross-sectional**  
4 **study**  
5

6  
7 **Authors:** Kristina Laugesen;<sup>1</sup> Irene Petersen;<sup>1,2</sup> Lars Pedersen;<sup>1</sup> Finn Breinholt Larsen;<sup>3</sup> Jens  
8  
9 Otto Lunde Jørgensen;<sup>4</sup> Henrik Toft Sørensen<sup>1</sup>  
10

11 **Affiliations:**  
12

13  
14 <sup>1</sup> Department of Clinical Epidemiology, Aarhus University Hospital, Aarhus, Denmark.  
15

16 <sup>2</sup> Department of Primary Care and Population Health, University College London, London, UK  
17

18 <sup>3</sup> DEFACTUM, Public Health & Health Services Research, Central Denmark Region, Aarhus,  
19  
20 Denmark  
21

22 <sup>4</sup> Department of Endocrinology and Internal Medicine, Aarhus University Hospital, Aarhus  
23  
24 Denmark  
25

26  
27  
28  
29  
30 **Correspondence:** Kristina Laugesen, Department of Clinical Epidemiology, Aarhus University  
31  
32 Hospital, Olof Palmes Allé 43-45, 8200 Aarhus N, Denmark. Telephone: +45 871 68063. E-  
33  
34 mail: Kristina.laugesen@clin.au.dk  
35

36 **Word count:** 2,058  
37

38  
39 **Keywords:** glucocorticoids; Body Mass Index; Alcohol Drinking; Exercise; Smoking; Diet  
40  
41  
42  
43  
44  
45  
46  
47  
48  
49  
50  
51  
52  
53  
54  
55  
56  
57  
58  
59  
60

## ABSTRACT

**Objectives:** Lifestyle may affect observed associations between glucocorticoid use and adverse events. This study aimed to investigate whether lifestyle differ according to use of systemic glucocorticoids.

**Design:** Population-based cross-sectional study.

**Setting:** The Central Denmark Region.

**Participants:** 30,245 adults ( $\geq 25$  years of age) who participated in a questionnaire-based public health survey in 2010.

**Outcome measures:** Systemic glucocorticoid use was categorised as never use, current use (prescription redemption  $\leq 90$  days before completing the questionnaire), recent use (prescription redemption 91-365 days before completing the questionnaire) and former use (prescription redemption  $> 365$  days before completing the questionnaire). We computed the prevalence of lifestyle factors (body mass index, smoking, alcohol intake, physical activity, and dietary habits) according to glucocorticoid use. We then estimated age-adjusted prevalence ratios (aPRs) and 95% confidence intervals (CI), comparing the categories of glucocorticoid users vs. never users. All analyses were stratified by sex.

**Results:** Of the 30,245 participants (53% women, median age 53 years), 563 (1.9%) were current users, 885 (2.9%) were recent users, 3,054 (10%) were former users, and 25,743 (85%) were never users. Ever users of glucocorticoids had a higher prevalence of obesity than never users [18% versus 14%, aPR=1.4, 95% CI 1.2 to 1.5 in women and 17% versus 15%, aPR=1.2, 95% CI 1.1 to 1.4 in men]. In women, ever users of glucocorticoids had a lower prevalence of

1  
2  
3 high-risk alcohol consumption compared to never users [17% versus 20%, aPR=0.8, 95% CI 0.7  
4  
5 to 1.0]. Smoking habits, diet and physical activity did not differ substantially according to use of  
6  
7 glucocorticoids.  
8  
9

10  
11 **Conclusion:** Glucocorticoid users had a higher prevalence of obesity and female glucocorticoid  
12  
13 users had a lower prevalence of high-risk alcohol consumption compared to never users. Our  
14  
15 findings should be considered when observational studies on glucocorticoids are conducted.  
16  
17 Especially, when data on lifestyle is not available.  
18  
19  
20  
21  
22

### 23 **Strengths and limitations of this study**

- 24  
25  
26 • Lifestyle may confound the observed associations between glucocorticoid use and  
27  
28 adverse events in observational studies.
- 29  
30  
31 • This large population-based study may guide assessment of the association between  
32  
33 lifestyle and glucocorticoid use when data on lifestyle factors is not available.
- 34  
35  
36 • The response rate to the questionnaire was 67% and it is possible that the respondents had  
37  
38 a different health profile than non-respondents. To minimize bias due to non-response,  
39  
40 we used a weighting method developed for this particular survey.
- 41  
42  
43 • Information on lifestyle factors was based on self-reported data, which can be prone to  
44  
45 misclassification.
- 46  
47  
48 • As this study had a cross-sectional design, it was unable to evaluate whether lifestyle  
49  
50 predicts glucocorticoid use or vice versa.  
51  
52  
53  
54  
55  
56  
57  
58  
59  
60

## BACKGROUND

Since their introduction in the 1950s, glucocorticoids have been prescribed to treat numerous inflammatory conditions and are widely used with annual prevalence of 3% in Denmark.[1]

However, glucocorticoids also are associated with several adverse events, including truncal obesity, hypertension, dyslipidemia,[2] cardiac disease,[3-6] venous thromboembolism,[5] diabetes mellitus,[7] psychiatric illnesses,[8] and osteoporosis.[9]

Lifestyle factors, including smoking, alcohol consumption, physical inactivity, and obesity, are well-described risk factors for many adverse events associated with glucocorticoids.[10-13]

Moreover, prior studies have found that unhealthy lifestyle is abundant in populations with diseases frequently treated with glucocorticoids, e.g. chronic obstructive pulmonary disease (COPD), inflammatory bowel disease, and rheumatoid arthritis, and also associated with severity of disease development.[14-20] Thus, lifestyle factors potentially can confound observed associations between glucocorticoid exposure and adverse events. Pharmacosurveillance of glucocorticoids is often performed using observational studies, in which control of such confounders is important. However, many data sources used for surveillance may lack data on lifestyle. This has been acknowledged as a limitation in prior studies.[5, 21]

To our knowledge, no prior studies have specifically investigated lifestyle in glucocorticoid users. Using data from a population-based health survey in Denmark, we therefore conducted a cross-sectional study to examine lifestyle among the adult Danish population according to use of systemic glucocorticoids.

## METHODS

### Setting

1  
2  
3 Denmark provides tax-supported health services to all residents with access to primary and  
4 secondary care free-of-charge. A unique central personal registration number is assigned to all  
5  
6 Danish residents at birth or immigration, permitting accurate and unambiguous linkage of  
7  
8 relevant registries at the individual level.[22] Denmark is administratively divided into five  
9  
10 regions. We conducted this study in the Central Denmark Region, with a population of 1.2  
11  
12 million inhabitants.  
13  
14  
15

### 16 17 **Study population**

18  
19 The study population was identified through responses to the survey, “Hvordan har du det?”  
20  
21 (How Are You?), a questionnaire-based public health study conducted by DEFACTUM  
22  
23 (formerly Centre for Public Health and Quality Improvement).[23] Between February and May  
24  
25 2010, a random sample of 52,400 people (7,026 in the 16-24 year age group and 45,373 in the  $\geq$   
26  
27 25 year age group) living in the Central Denmark Region was invited to participate in the study.  
28  
29 The current study only included adults ( $\geq$  25 years of age) who completed the study’s detailed  
30  
31 questionnaire (30,245 persons, 67% of those invited).  
32  
33  
34  
35  
36  
37

### 38 **Lifestyle data**

39  
40 Lifestyle-related items included in the questionnaire were body mass index (BMI), participation  
41  
42 in regular leisure-time physical activities, diet, smoking status, and alcohol intake. BMI was  
43  
44 calculated as self-reported weight in kilograms divided by self-reported height in meters,  
45  
46 squared. BMI was categorized according to WHO criteria, as underweight (BMI <18.5), normal  
47  
48 weight (BMI 18.5–24), overweight (BMI 25–29), and obese (BMI  $\geq$ 30).[24] Questionnaire items  
49  
50 on physical activity focused on participation in leisure sports or other regular exercise (yes/no).  
51  
52 To assess diet, the health survey used a scoring system developed by the Research Centre for  
53  
54  
55  
56  
57  
58  
59  
60

1  
2  
3 Prevention and Health, Capital Region of Denmark. Thirty different questions were included on  
4 intake of fruit, vegetables, fish, and fat. The scoring system was used to summarize responses  
5 into categories of 'healthy' (high amount of fruit, vegetables, fish, and low amounts of saturated  
6 fat), 'reasonably healthy' (median high intake of fruit, vegetables, fish, and saturated fat), or  
7 'unhealthy' (low amount of fruit, vegetables, and fish, and high amount of saturated fat).  
8  
9  
10  
11  
12  
13  
14 Smoking status was categorized as never, former, or current (daily or occasional). We  
15 categorized alcohol use according to the Danish Health and Medicine Authority's  
16 recommendations, that is, high-risk consumption [ $>7/14$  (women/men) drinks weekly] or low-  
17 risk consumption ( $\leq 7/14$  drinks weekly).  
18  
19  
20  
21  
22  
23

#### 24 **Data on medication use**

25  
26  
27 Use of systemic glucocorticoids and inhaled medicine for COPD was identified through the  
28 Danish National Health Service Prescription database (DNHSPD). The DNHSPD contains  
29 information on prescriptions reimbursed by the National Health System since 2004.[25] Use of  
30 systemic glucocorticoids was defined as never use (persons who never redeemed a prescription  
31 for a systemic glucocorticoid before completing the questionnaire) and ever use of systemic  
32 glucocorticoids. Ever use was categorized further according to timing of exposure and total  
33 number of redeemed prescriptions. Timing of exposure was classified as current use (redemption  
34 of a prescription for a systemic glucocorticoid  $\leq 90$  days before completing the questionnaire),  
35 current new use (first-ever redemption of a prescription  $\leq 90$  days before completing the  
36 questionnaire), current continuing use (first-ever prescription redemption more than 90 days  
37 before completing the questionnaire, but most recent prescription  $\leq 90$  days), recent use  
38 (redemption of a prescription for a systemic glucocorticoid 91-365 days before completing the  
39 questionnaire), and former use (redemption of a prescription for a systemic glucocorticoid  $> 365$   
40  
41  
42  
43  
44  
45  
46  
47  
48  
49  
50  
51  
52  
53  
54  
55  
56  
57  
58  
59  
60



1  
2  
3 days before completing the questionnaire). The total number of redeemed prescriptions was  
4  
5 categorized as a single prescription, two-five and > five redeemed prescriptions. [See  
6  
7 Supplementary Table 1 for codes used in the Anatomical Therapeutic Chemical (ATC)  
8  
9 classification system of the World Health Organization.]  
10  
11  
12

### 13 **Statistical analyses**

14  
15 First, prevalence of lifestyle factors was computed according to glucocorticoid use.

16  
17 Second, adjusted prevalence ratios (aPRs) and 95% confidence intervals (CIs) were estimated  
18  
19 using a Poisson regression model. All categories of systemic glucocorticoid use (ever use,  
20  
21 current use, current new use, current continuing use, recent use, and former use as well as one,  
22  
23 two-five, and > five redeemed prescription in total) were compared to the reference of never use.  
24  
25

26  
27 The PRs were adjusted for age (10-year age groups). All analyses were stratified by sex.

28  
29 Third, an analysis stratified by presence of COPD (yes/ no) were conducted. Based on history of  
30  
31 medication use, COPD was defined as at least two redeemed prescriptions after age 40 (and none  
32  
33 before) for a long-acting beta2 agonist (LABA), a long-acting muscarinic receptor antagonist  
34  
35 (LAMA) or an inhaled corticosteroid (ICS) (or combinations thereof). These analyses were  
36  
37 adjusted for sex and age (10-year age groups).  
38  
39  
40

41  
42 In estimating prevalence and PRs, post-survey weights computed at Statistic Denmark were used  
43  
44 to account for survey design and non-response.[26]  
45  
46

47  
48 All statistical analyses were conducted using Stata software (Release V.12, StataCorp LP).  
49  
50

### 51 **Patient involvement**

52  
53 No patients were involved in setting the research question or the outcome measures, nor were  
54  
55 they involved in developing plans for design or implementation of the study. No patients were  
56  
57  
58  
59  
60

asked to advise on interpretation or writing up of results. There are no plans to disseminate the results of the research to study participants or the relevant patient community.

## RESULTS

In total, 30,245 persons completed the study questionnaire (53% women), and median age was 53 years. Of these, 563 (1.9%) were current users of glucocorticoids, 885 (2.9%) were recent users, 3,054 (10%) were former users, and 25,743 (85%) were never users. The prevalence of demographics and lifestyle factors according to glucocorticoid use is presented in Tables 1a and 1b and in the Supplementary Table 2, Supplementary Table 3a, and Supplementary Table 3b. Adjusted PRs are presented in Figure 1, Figure 2, Figure 3, and Figure 4 as well as in the Supplementary Table 4 and Supplementary Table 5.

**Table 1a. Prevalence of lifestyle factors according to glucocorticoid use in women. Percentages are weighted**

|                                  | Ever use    | Current use | Recent use | Former use  | Never use    | Total        |
|----------------------------------|-------------|-------------|------------|-------------|--------------|--------------|
|                                  | N (%)       | N (%)       | N (%)      | N (%)       | N (%)        | N (%)        |
| <b>All</b>                       | 2,460 (100) | 301 (100)   | 489 (100)  | 1,670 (100) | 13,485 (100) | 15,945 (100) |
| <b>Median age (range), years</b> | 61 (25-98)  | 66 (26-94)  | 58 (25-98) | 58 (25-98)  | 52 (25-101)  | 53 (25-101)  |
| <b>Body Mass Index</b>           |             |             |            |             |              |              |
| < 18.5                           | 58 (2.7)    | 17 (5.4)    | 15 (3.9)   | 26 (1.8)    | 310 (2.6)    | 368 (2.6)    |
| 18.5-24                          | 1,113 (45)  | 126 (38)    | 218 (44)   | 769 (46)    | 7,203 (54)   | 8,316 (52)   |
| 25-29                            | 717 (28)    | 89 (31)     | 120 (23)   | 508 (29)    | 3,718 (27)   | 4,435 (27)   |
| ≥30                              | 444 (18)    | 50 (17)     | 105 (22)   | 289 (17)    | 1,862 (14)   | 2,306 (14)   |
| Missing                          | 128 (6.3)   | 19 (8.2)    | 31 (7.3)   | 78 (5.6)    | 392 (3.3)    | 520 (3.8)    |
| <b>Smoking</b>                   |             |             |            |             |              |              |
| Current                          | 552 (22)    | 66 (20)     | 112 (22)   | 374 (22)    | 2,744 (21)   | 3,296 (21)   |
| Former                           | 765 (30)    | 111 (35)    | 148 (30)   | 506 (29)    | 3,913 (28)   | 4,678 (28)   |
| Never                            | 1,047 (44)  | 107 (40)    | 206 (42)   | 734 (45)    | 6,535 (49)   | 7,582 (48)   |

|                                                                |            |          |          |            |             |             |
|----------------------------------------------------------------|------------|----------|----------|------------|-------------|-------------|
| Missing                                                        | 96 (4.2)   | 17 (4.6) | 23 (5.3) | 56 (3.9)   | 293 (2.4)   | 389 (2.7)   |
| <b>Diet</b>                                                    |            |          |          |            |             |             |
| Unhealthy                                                      | 191 (7.9)  | 29 (9.7) | 36 (7.6) | 126 (7.7)  | 852 (6.8)   | 1,043 (7.0) |
| Reasonably healthy                                             | 1,425 (58) | 181 (62) | 280 (57) | 964 (57)   | 8,021 (60)  | 9,446 (59)  |
| Healthy                                                        | 730 (29)   | 72 (22)  | 143 (27) | 515 (31)   | 4,234 (30)  | 4,964 (30)  |
| Missing                                                        | 114 (5.2)  | 19 (5.5) | 30 (7.6) | 65 (4.4)   | 378 (3.2)   | 492 (3.5)   |
| <b>Alcohol intake</b>                                          |            |          |          |            |             |             |
| Low risk consumption                                           | 1,832 (76) | 231 (80) | 376 (77) | 340 (74)   | 10,146 (75) | 11,978 (75) |
| High risk consumption                                          | 458 (17)   | 43 (12)  | 75 (13)  | 1,225 (18) | 2,730 (20)  | 3,188 (19)  |
| Missing                                                        | 170 (7.9)  | 27 (8.1) | 38 (9.2) | 105 (7.5)  | 609 (4.7)   | 779 (5.2)   |
| <b>Participation in regular leisure time physical activity</b> |            |          |          |            |             |             |
| No                                                             | 1,179 (49) | 171 (59) | 245 (53) | 763 (46)   | 5,853 (44)  | 7,032 (45)  |
| Yes                                                            | 1,209 (48) | 121 (39) | 228 (44) | 860 (50)   | 7,354 (54)  | 8,563 (53)  |
| Missing                                                        | 72 (3.2)   | 9 (2.3)  | 16 (3.2) | 47 (3.3)   | 278 (2.3)   | 350 (2.4)   |

Never use: Persons who never redeemed a prescription for a systemic glucocorticoid before completing the questionnaire. Ever use At least one redemption of a prescription for a systemic glucocorticoid before completing the questionnaire. Current use: Redemption of a prescription for a systemic glucocorticoid  $\leq$  90 days before completing the questionnaire. Recent use: Redemption of a prescription for a systemic glucocorticoid 91-365 days before completing the questionnaire. Former use: Redemption of a prescription for a systemic glucocorticoid  $>$  365 days before completing the questionnaire.

**Table 1b. Prevalence of lifestyle factors according to glucocorticoid use in men. Percentages are weighted**

|                                  | Ever use    | Current use | Recent use | Former use  | Never use    | Total        |
|----------------------------------|-------------|-------------|------------|-------------|--------------|--------------|
|                                  | N (%)       | N (%)       | N (%)      | N (%)       | N (%)        | N (%)        |
| <b>All</b>                       | 2,042 (100) | 262 (100)   | 396 (100)  | 1,384 (100) | 12,258 (100) | 14,300 (100) |
| <b>Median age (range), years</b> | 61 (25-98)  | 65 (28-94)  | 57 (25-88) | 59 (25-100) | 53 (25-99)   | 54 (25-100)  |
| <b>Body Mass Index</b>           |             |             |            |             |              |              |
| < 18.5                           | 21 (1.3)    | 6 (4.0)     | 6 (1.8)    | 9 (5.3)     | 40 (0.04)    | 61 (0.6)     |
| 18.5-24                          | 644 (33)    | 88 (34)     | 128 (34)   | 428 (32)    | 4,572 (39)   | 5,216 (38)   |
| 25-29                            | 959 (46)    | 116 (41)    | 188 (46)   | 655 (47)    | 5,566 (44)   | 6,525 (44)   |
| $\geq$ 30                        | 365 (17)    | 47 (19)     | 65 (14)    | 253 (18)    | 1,864 (15)   | 2,229 (15)   |
| Missing                          | 53 (2.8)    | 5 (2.2)     | 9 (3.5)    | 39 (2.6)    | 216 (1.7)    | 269 (1.9)    |

**Smoking**

|         |          |          |          |          |            |            |
|---------|----------|----------|----------|----------|------------|------------|
| Current | 518 (27) | 64 (27)  | 98 (26)  | 356 (27) | 3,072 (27) | 3,590 (27) |
| Former  | 843 (38) | 126 (43) | 157 (36) | 560 (38) | 4,022 (30) | 4,865 (31) |
| Never   | 630 (32) | 67 (27)  | 132 (35) | 431 (32) | 4,968 (42) | 5,598 (41) |
| Missing | 51 (2.8) | 5 (2.2)  | 9 (3.2)  | 37 (2.8) | 196 (1.6)  | 247 (1.8)  |

**Diet**

|                    |            |          |          |          |            |            |
|--------------------|------------|----------|----------|----------|------------|------------|
| Unhealthy          | 310 (15)   | 47 (15)  | 63 (15)  | 200 (15) | 1,906 (16) | 2,216 (16) |
| Reasonably healthy | 1,301 (64) | 159 (62) | 253 (65) | 889 (64) | 7,874 (64) | 9,175 (64) |
| Healthy            | 342 (15)   | 38 (13)  | 68 (16)  | 236 (15) | 2,069 (17) | 2,411 (16) |
| Missing            | 89 (5.1)   | 18 (9.3) | 12 (3.2) | 59 (4.9) | 409 (3.4)  | 498 (3.6)  |

**Alcohol intake**

|                       |            |          |          |            |            |             |
|-----------------------|------------|----------|----------|------------|------------|-------------|
| Low risk consumption  | 1,489 (72) | 184 (70) | 293 (73) | 1,012 (72) | 9,231 (75) | 10,720 (75) |
| High risk consumption | 443 (22)   | 62 (21)  | 81 (19)  | 300 (22)   | 2,588 (21) | 3,031 (21)  |
| Missing               | 110 (6.7)  | 16 (8.7) | 22 (7.6) | 72 (6.0)   | 439 (3.5)  | 549 (4.0)   |

**Participation in regular leisure time physical activity**

|         |            |          |          |          |            |            |
|---------|------------|----------|----------|----------|------------|------------|
| No      | 1,128 (54) | 82 (65)  | 214 (52) | 739 (52) | 6,265 (50) | 7,393 (51) |
| Yes     | 874 (44)   | 175 (32) | 171 (45) | 621 (46) | 5,791 (48) | 6,665 (48) |
| Missing | 40 (2.2)   | 5 (2.6)  | 11 (2.7) | 24 (2.0) | 202 (1.6)  | 242 (1.7)  |

Never use: Persons who never redeemed a prescription for a systemic glucocorticoid before completing the questionnaire. Ever use At least one redemption of a prescription for a systemic glucocorticoid before completing the questionnaire. Current use: Redemption of a prescription for a systemic glucocorticoid  $\leq$  90 days before completing the questionnaire. Recent use: Redemption of a prescription for a systemic glucocorticoid 91-365 days before completing the questionnaire. Former use: Redemption of a prescription for a systemic glucocorticoid > 365 days before completing the questionnaire.

**Body Mass Index**

In women, ever users of glucocorticoids were more obese than never users [18% versus 14%; aPR 1.4 (95% CI 1.2 to 1.5)] (Table 1a and Figure 1) with highest prevalence in current continuing users (21%) and recent users (22%) (Table 1a and Supplementary Table 2). Also,

1  
2  
3 male ever users were more obese than never users [17% versus 15%; aPR 1.2 (95% CI 1.1 to  
4  
5 1.4)] (Table 1b and Figure 2).

### 8 **Smoking and COPD**

9  
10 Glucocorticoid ever users had a similar prevalence of smoking as never users of glucocorticoids  
11  
12 in both women [aPR 1.1 (95% CI 1.0 to 1.1)] and men [aPR 1.1 (95% CI 1.1 to 1.1)] (Figure 1  
13  
14 and Figure 2). The finding of a similar prevalence of smoking compared to never users were  
15  
16 consistent across all categories of glucocorticoid users (Figure 1, Figure, 2, Supplementary Table  
17  
18 4) and when stratifying on COPD (Figure 3, Figure 4 and Supplementary Table 5)

### 21 **Alcohol Intake**

22  
23 In women, the prevalence of high-risk alcohol consumption was lower in ever users of  
24  
25 glucocorticoids than never users [17% vs. 20%; aPR = 0.8 (95% CI 0.7 to 1.0)] (Table 1a and  
26  
27 Figure 1). For men there was no difference [aPR 1.0 (95% CI 0.9 to 1.1)] (Table 1b and Figure  
28  
29 2).

### 33 **Physical activity**

34  
35 Physical activity did not differ according to use of glucocorticoids in either women [aPR 1.1  
36  
37 (95% CI 1.0 to 1.1)] or men [aPR 1.0 (95% CI 1.0 to 1.0)] (Figure 1a and Figure 1b).

## 40 **DISCUSSION**

41  
42  
43  
44 This population-based study found that users of systemic glucocorticoids had a higher prevalence  
45  
46 of obesity than never users. In women, the prevalence of obesity was 1.4-fold higher and in men  
47  
48 1.2-fold higher. In women, the prevalence of high-risk alcohol consumption was 0.8-fold lower  
49  
50 in users of glucocorticoids than never users. This finding did not apply for men. Smoking habits,  
51  
52 diet and physical activity did not differ substantially according to use of systemic  
53  
54 glucocorticoids.  
55  
56  
57  
58  
59  
60

1  
2  
3 Although abdominal obesity is a common feature of excess glucocorticoid exposure,[2, 27] no  
4  
5 studies to date have examined whether obesity differ according to glucocorticoid use. Several  
6  
7 studies, however, have investigated obesity in different inflammatory diseases. One study found  
8  
9 that BMI is an important risk factor for self-reported arthritis, with a prevalence of arthritis of  
10  
11 25.9% among normal weight, 32.1% among overweight (25 to 29.9 BMI), and 43.5% among  
12  
13 obese (>30 BMI) adults.[18] In contrast, studies of inflammatory bowel disease found that the  
14  
15 prevalence of overweight and obesity was lower than in the general population.[19] Physical  
16  
17 activity has been reported to be low in some patient groups ordinarily treated with  
18  
19 glucocorticoids; one study found that more than 60% of adults with arthritis do not comply with  
20  
21 physical activity recommendations.[20] The reasons why the majority of persons with arthritis  
22  
23 did not meet physical activity recommendations were not investigated, but authors discussed if it  
24  
25 may be related to arthritis-specific barriers to physical activity such as fear of making their  
26  
27 arthritis worse, fatigue or pain.[20] In our study, we found no difference in physical activity  
28  
29 according to glucocorticoid use. In any case, patients with arthritis or inflammatory bowel  
30  
31 disease are not comparable to our population-based cohort.  
32  
33  
34  
35  
36

37 While we conducted a large population-based cohort study with detailed information on lifestyle  
38  
39 factors, its limitations must be considered. First, the response rate to the questionnaire was 67%.  
40  
41 We cannot be sure if persons who completed the health survey had a different health profile than  
42  
43 those who declined. To minimize such bias, we used a weighting method developed by Statistic  
44  
45 Denmark for this particular survey.[26] Second, persons who completed the questionnaire might  
46  
47 have answered incorrectly. Third, redeemed prescriptions may be an imperfect measure of actual  
48  
49 drug intake and its timing. Also, the prescription database only covers prescriptions from 2004  
50  
51 on, which may have led to misclassification of glucocorticoid use. Misclassification of  
52  
53  
54  
55  
56  
57  
58  
59

1  
2  
3 glucocorticoid use may lead to an underestimation of the associations. The algorithm used to  
4  
5 define people as having COPD is also imperfect. In particular, certain persons identified as  
6  
7 having COPD actually may have asthma. To address this issue, redeemed prescriptions for  
8  
9 LABA or LAMA before age 40 were an exclusion criterion, as asthma onset most often occurs in  
10  
11 childhood or adolescence, whereas COPD onset is later in life. Last, as this study had a cross-  
12  
13 sectional design, it was unable to evaluate whether lifestyle predicts glucocorticoid use or vice  
14  
15 versa. Truncal obesity is a well-known adverse effect of excess glucocorticoid use. We found  
16  
17 that current continuing and recent users of glucocorticoids had higher prevalence of obesity than  
18  
19 current new users in women, which could indicate that obesity arises after glucocorticoid  
20  
21 treatment.  
22  
23  
24  
25

26 Our study has important implications for evaluating prior observational studies and for  
27  
28 conducting future studies. While lifestyle factors may be risk factors for study outcomes, they  
29  
30 also constitute potential confounders. Results from this study may guide assessment of the  
31  
32 association between lifestyle and glucocorticoid use and can for example be used in a bias  
33  
34 analysis when data on lifestyle factors is not available.[5, 6, 28] Yet, it must be acknowledged  
35  
36 that any assessment should not be based solely on associations found in this study. Directed  
37  
38 acyclic graphs (DAGs) could be applied to ensure that recorded lifestyle factors are not  
39  
40 mediators or colliders.[29]  
41  
42  
43  
44  
45

46 In conclusion, glucocorticoid users had a higher prevalence of obesity and female glucocorticoid  
47  
48 users had a lower prevalence of high-risk alcohol consumption compared to never users.

49 Smoking habits, diet and physical activity did not differ substantially according to use of  
50  
51 glucocorticoids. Observational studies on glucocorticoids should take these findings into  
52  
53 consideration. Especially, when data on life style is not available.  
54  
55  
56  
57  
58  
59

## FOOTNOTES

**Funding:** This work was supported by Department of Clinical Epidemiology. Department of Clinical Epidemiology, Aarhus University Hospital, receives funding for other studies from companies in the form of research grants to (and administered by) Aarhus University. None of these studies have any relation to the present study.

**Competing interests:** The authors report no conflicts of interest and have no financial disclosures.

**Author statement:** KL, IP, FBL, LP, JOLJ, and HTS made primary contributions to the concept of the study and wrote the manuscript. KL performed statistical analyses. KL, IP, FBL, LP, JOLJ, and HTS contributed to the interpretation of results and revised the manuscript critically. All authors approved the final manuscript.

**Ethics Approval:** This study was approved by the Danish Data Protection Agency (Record number: 2016-051-000001, serial number 448). For this type of study, approval from Ethics committee and formal consent is not required.

**Data sharing statement:** Data are available as presented in the paper and in the supplementary files. According to Danish legislation, our own approvals to use the Danish data sources for the current study do not allow us to distribute or make patient data directly available to other parties. Interested researchers may contact Julie Christiansen (juechi@rm.dk) for access to the questionnaire “Hvordan har du det?” (How Are You?). (For updated information please visit: <http://www.defactum.dk/om-DEFACTUM/projektsite/hvordan-har-du-det/ansogning-om-adgang-til-data/>). For access to prescription data from the Danish National Health Service Prescription Database please contact Helle Schleicher Kjær (hsk@clin.au.dk) (For updated information please visit: <http://kea.au.dk/research/registries-and-biobanks/the-danish-national-health-service-prescription-database/>).

## REFERENCES



- 1 Laugesen K, Jorgensen JOL, Sorensen HT, et al. Systemic glucocorticoid use in Denmark: a population-based prevalence study. *BMJ open* 2017;7:e015237-2016-.
- 2 Pivonello R, De Martino MC, Iacuanello D, et al. Metabolic Alterations and Cardiovascular Outcomes of Cortisol Excess. *Frontiers of hormone research* 2016;46:54-65.
- 3 Davis JM, 3rd, Maradit Kremers H, Crowson CS, et al. Glucocorticoids and cardiovascular events in rheumatoid arthritis: a population-based cohort study. *Arthritis and Rheumatism* 2007;56:820-30.
- 4 Fardet L, Petersen I, Nazareth I. Risk of cardiovascular events in people prescribed glucocorticoids with iatrogenic Cushing's syndrome: cohort study. *BMJ (Clinical research ed)* 2012;345:e4928.
- 5 Johannesdottir SA, Horvath-Puho E, Dekkers OM, et al. Use of glucocorticoids and risk of venous thromboembolism: a nationwide population-based case-control study. *JAMA internal medicine* 2013;173:743-52.
- 6 Wei L, MacDonald TM, Walker BR. Taking glucocorticoids by prescription is associated with subsequent cardiovascular disease. *Annals of Internal Medicine* 2004;141:764-70.
- 7 Clore JN, Thurby-Hay L. Glucocorticoid-induced hyperglycemia. *Endocrine practice : official journal of the American College of Endocrinology and the American Association of Clinical Endocrinologists* 2009;15:469-74.
- 8 Fardet L, Petersen I, Nazareth I. Suicidal behavior and severe neuropsychiatric disorders following glucocorticoid therapy in primary care. *The American Journal of Psychiatry* 2012;169:491-7.
- 9 van Staa TP, Leufkens HG, Cooper C. The epidemiology of corticosteroid-induced osteoporosis: a meta-analysis. *Osteoporosis international : a journal established as result of cooperation between the European Foundation for Osteoporosis and the National Osteoporosis Foundation of the USA* 2002;13:777-87.
- 10 Anderson JJ, Rondano P, Holmes A. Roles of diet and physical activity in the prevention of osteoporosis. *Scandinavian journal of rheumatologySupplement* 1996;103:65-74.
- 11 Hubert HB, Feinleib M, McNamara PM, et al. Obesity as an independent risk factor for cardiovascular disease: a 26-year follow-up of participants in the Framingham Heart Study. *Circulation* 1983;67:968-77.
- 12 Benjamin EJ, Levy D, Vaziri SM, et al. Independent risk factors for atrial fibrillation in a population-based cohort. The Framingham Heart Study. *Jama* 1994;271:840-4.
- 13 Hu FB, Manson JE, Stampfer MJ, et al. Diet, lifestyle, and the risk of type 2 diabetes mellitus in women. *The New England journal of medicine* 2001;345:790-7.
- 14 Barnes PJ. Chronic obstructive pulmonary disease. *The New England journal of medicine* 2000;343:269-80.
- 15 Lunney PC, Kariyawasam VC, Wang RR, et al. Smoking prevalence and its influence on disease course and surgery in Crohn's disease and ulcerative colitis. *Alimentary Pharmacology & Therapeutics* 2015;42:61-70.
- 16 Radner H, Lesperance T, Accortt NA, et al. Incidence and Prevalence of Cardiovascular Risk Factors Among Patients With Rheumatoid Arthritis, Psoriasis, or Psoriatic Arthritis. *Arthritis care & research* 2016.
- 17 Sugiyama D, Nishimura K, Tamaki K, et al. Impact of smoking as a risk factor for developing rheumatoid arthritis: a meta-analysis of observational studies. *Annals of the Rheumatic Diseases* 2010;69:70-81.
- 18 Mehrotra C, Naimi TS, Serdula M, et al. Arthritis, body mass index, and professional advice to lose weight: implications for clinical medicine and public health. *American Journal of Preventive Medicine* 2004;27:16-21.
- 19 Nic Suibhne T, Raftery TC, McMahon O, et al. High prevalence of overweight and obesity in adults with Crohn's disease: associations with disease and lifestyle factors. *Journal of Crohn's & colitis* 2013;7:e241-8.

- 1  
2  
3 20 Fontaine KR, Heo M, Bathon J. Are US adults with arthritis meeting public health recommendations  
4 for physical activity? *Arthritis and Rheumatism* 2004;50:624-8.  
5 21 Christiansen CF, Christensen S, Mehnert F, et al. Glucocorticoid use and risk of atrial fibrillation or  
6 flutter: a population-based, case-control study. *Archives of Internal Medicine* 2009;169:1677-83.  
7 22 Schmidt M, Pedersen L, Sorensen HT. The Danish Civil Registration System as a tool in epidemiology.  
8 *European journal of epidemiology* 2014;29:541-9.  
9 23 Larsen FB, Ankersen PV, Poulsen S. Hvordan har du det? 2010 – Sundhedsprofil for region og  
10 kommuner [How Are you? 2010– Health profile for region and municipalities]. Report, Region  
11 Midtjylland, Denmark. 2011.  
12 24 2017.  
13 25 Johannesdottir SA, Horvath-Puho E, Ehrenstein V, et al. Existing data sources for clinical  
14 epidemiology: The Danish National Database of Reimbursed Prescriptions. *Clinical epidemiology*  
15 2012;4:303-13.  
16 26 Fangel S, Linde PC, Thorsted BL. Nye problemer med repræsentativitet i surveys, som opregning med  
17 registre kan reducere. *Metode & Data. Nye problemer med repræsentativitet i surveys, som opregning*  
18 *med registre kan reducere Metode & Data* 2007:14.  
19 27 Barahona MJ, Sucunza N, Resmini E, et al. Persistent body fat mass and inflammatory marker  
20 increases after long-term cure of Cushing's syndrome. *The Journal of clinical endocrinology and*  
21 *metabolism* 2009;94:3365-71.  
22 28 Rothman KJ, Greenland S, Lash TL. Modern Epidemiology, Third Edition. *Modern Epidemiology, third*  
23 *edition*. Philadelphia: Lippincott Williams & Wilkens 2008:345-52.  
24 29 Shrier I, Platt RW. Reducing bias through directed acyclic graphs. *BMC medical research methodology*  
25 2008;8:70.  
26  
27  
28  
29  
30  
31  
32  
33  
34  
35  
36  
37  
38  
39  
40  
41  
42  
43  
44  
45  
46  
47  
48  
49  
50  
51  
52  
53  
54  
55  
56  
57  
58  
59  
60

1  
2  
3 **FIGURES**  
4  
5  
6

7 **Fig. 1. Age-adjusted prevalence ratios (aPRs) and 95% confidence intervals (CIs) for**  
8 **lifestyle factors comparing glucocorticoid users to never users in women.**  
9

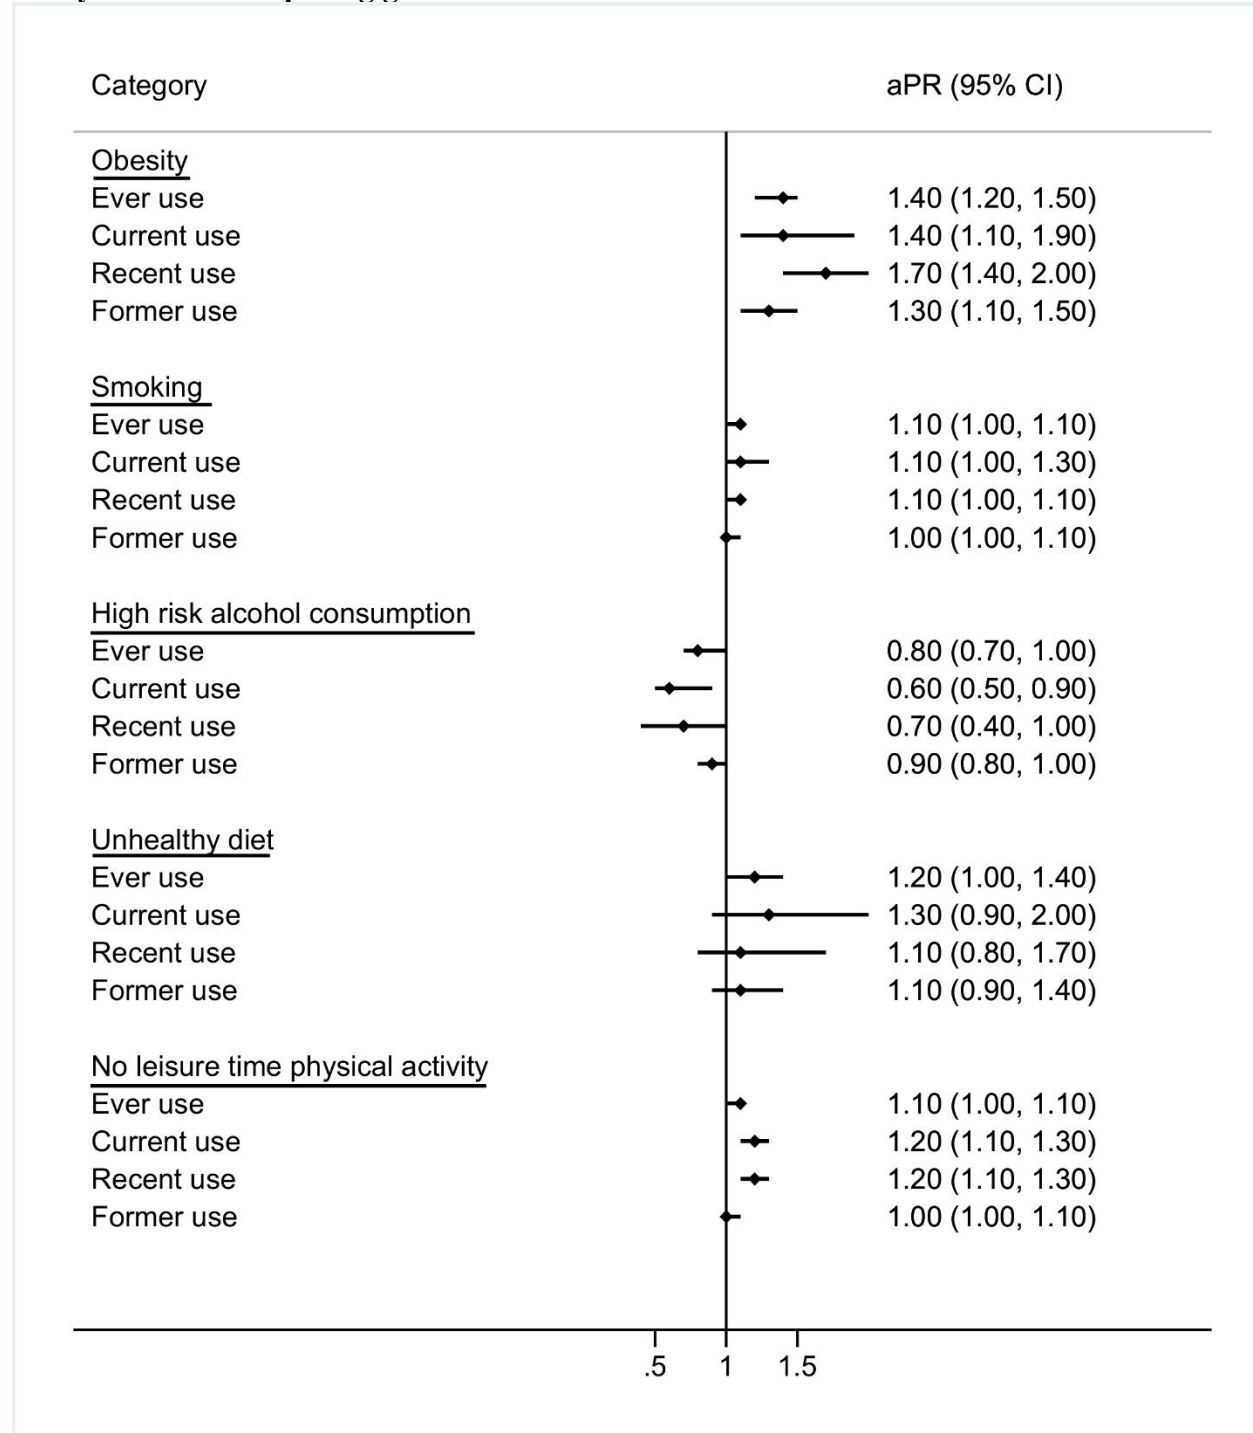

**Fig. 2. Age-adjusted prevalence ratios (aPRs) and 95% confidence intervals (CIs) for lifestyle factors comparing glucocorticoid users to never users in men.**

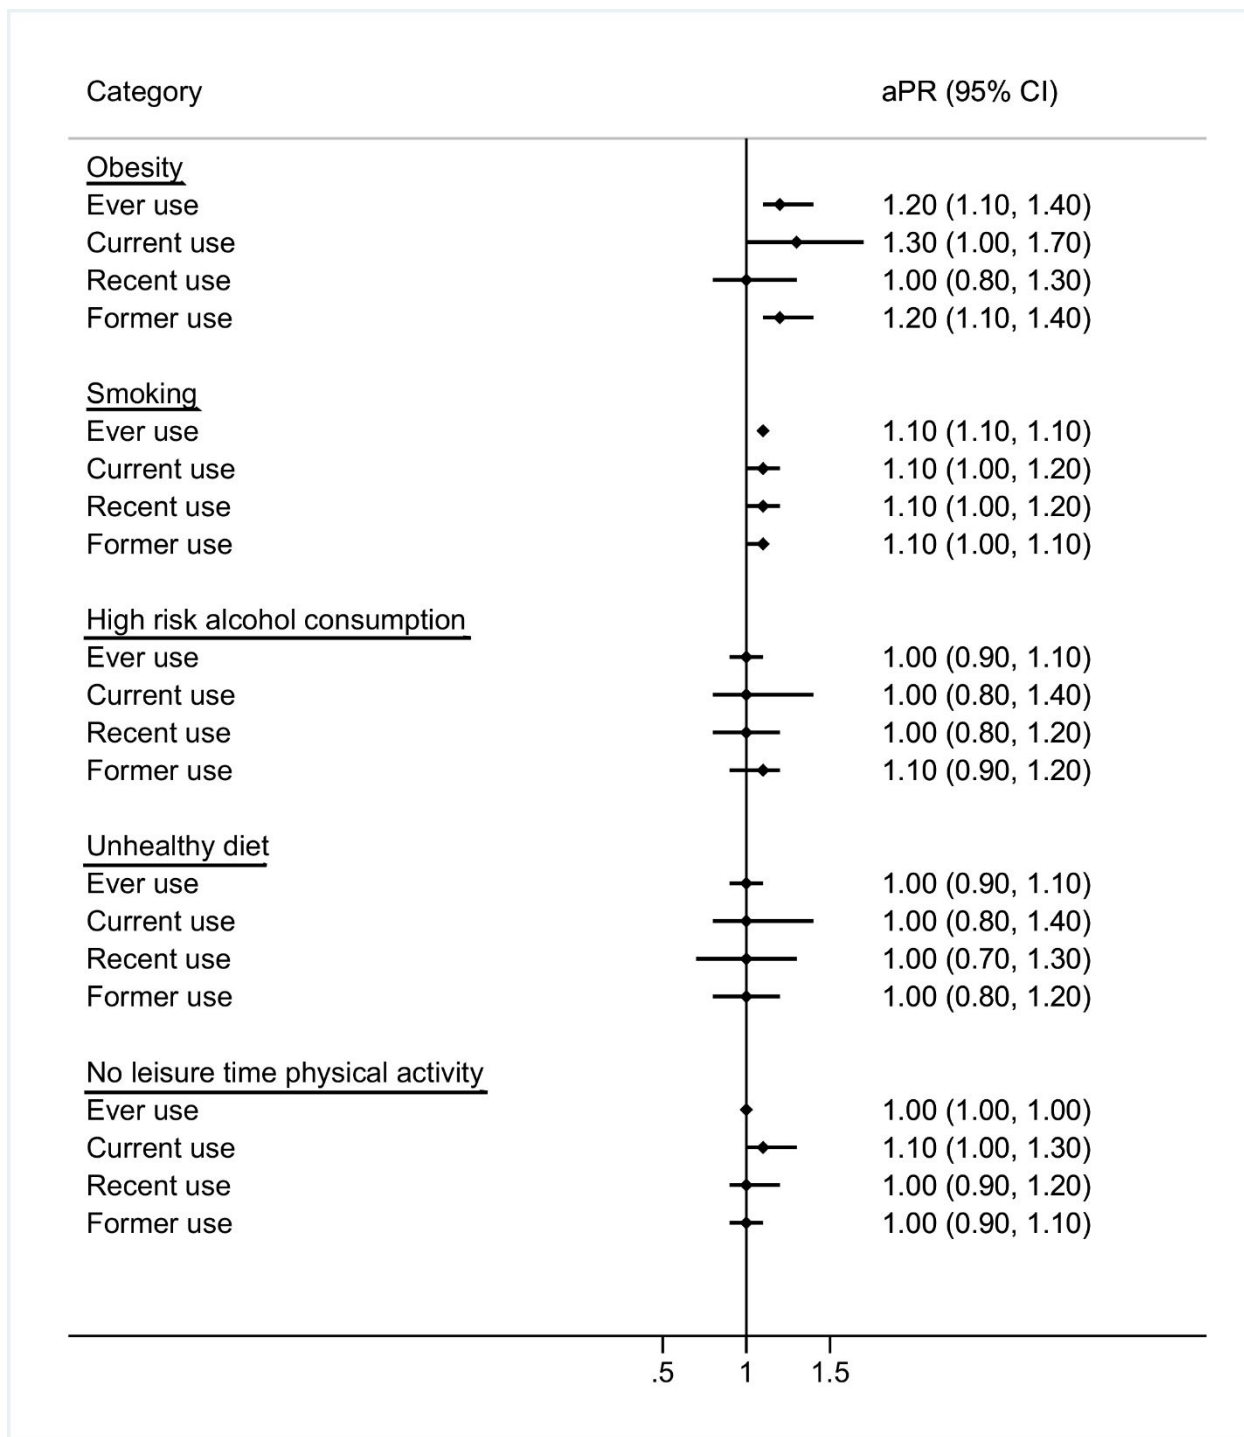

**Fig. 3. Age-adjusted prevalence ratios (aPRs) and 95% confidence intervals (CIs) for lifestyle factors comparing glucocorticoid users to never users in people with chronic obstructive pulmonary disease (COPD).**

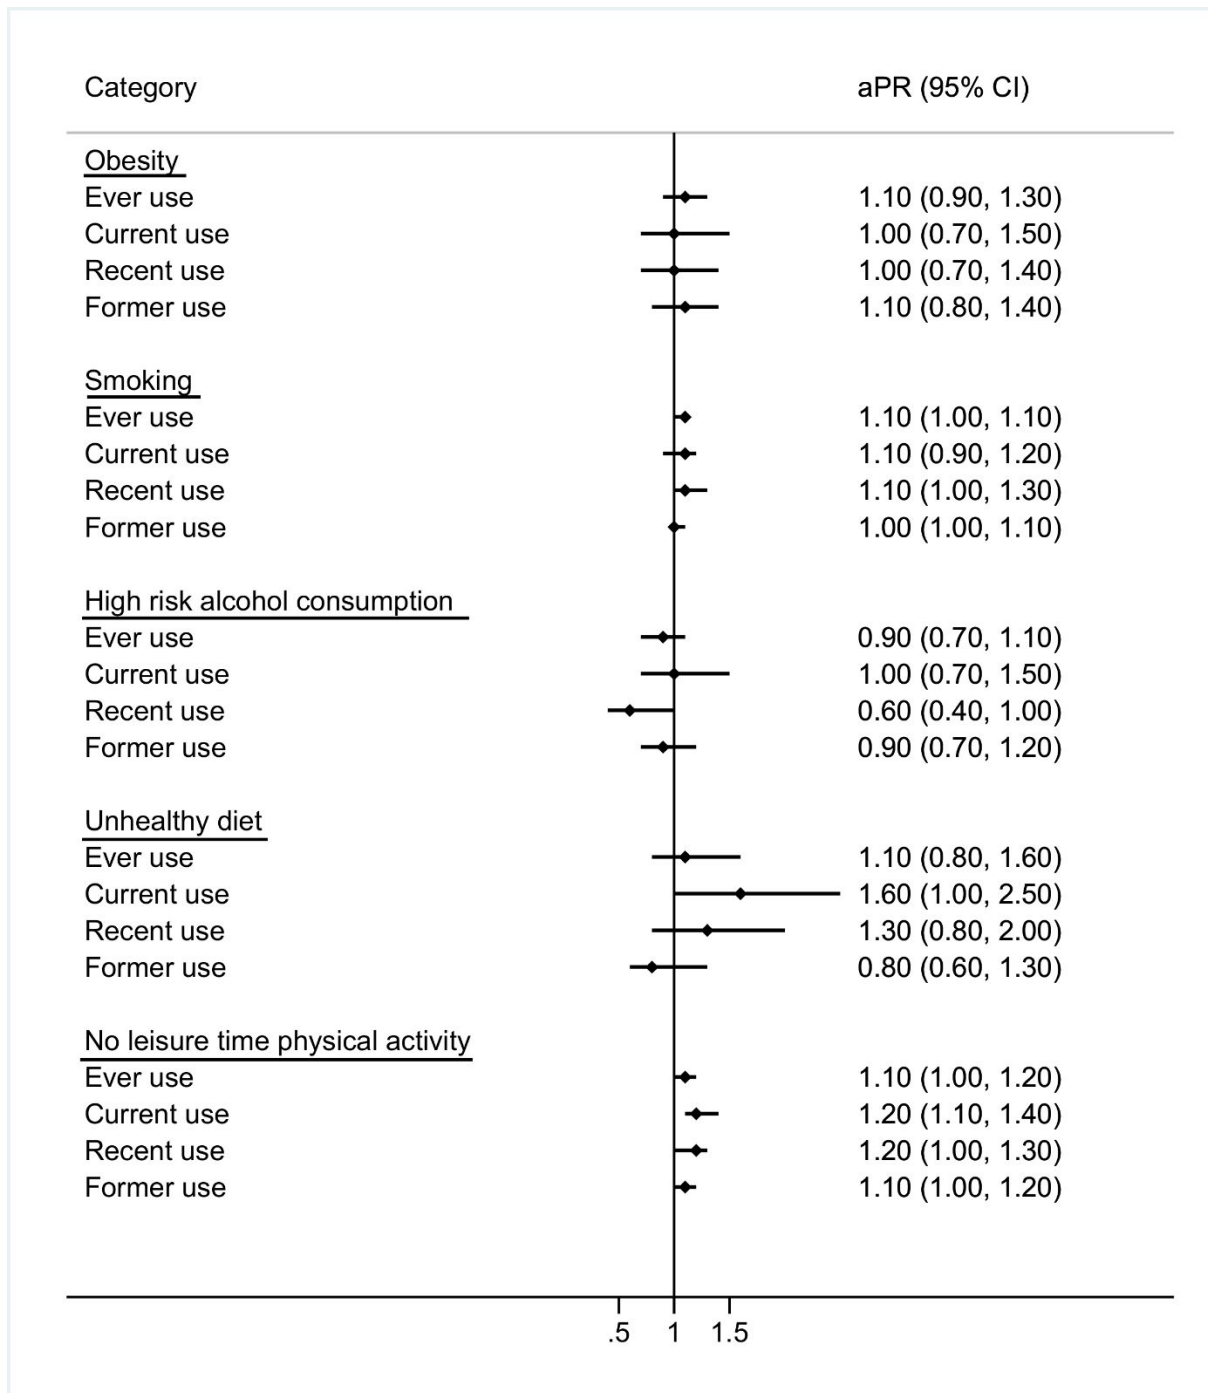

COPD was defined as at least two prescriptions for a long-acting beta2 agonist (LABA), a long-acting muscarinic receptor antagonist (LAMA), or an inhaled corticosteroid (ICS) (or combination thereof) after age 40, and no prescriptions for these agents redeemed at or before age 40.

**Fig. 4. Age-adjusted prevalence ratios (aPRs) and 95% confidence intervals (CIs) for lifestyle factors comparing glucocorticoid users to never users in people with no chronic obstructive pulmonary disease (COPD).**

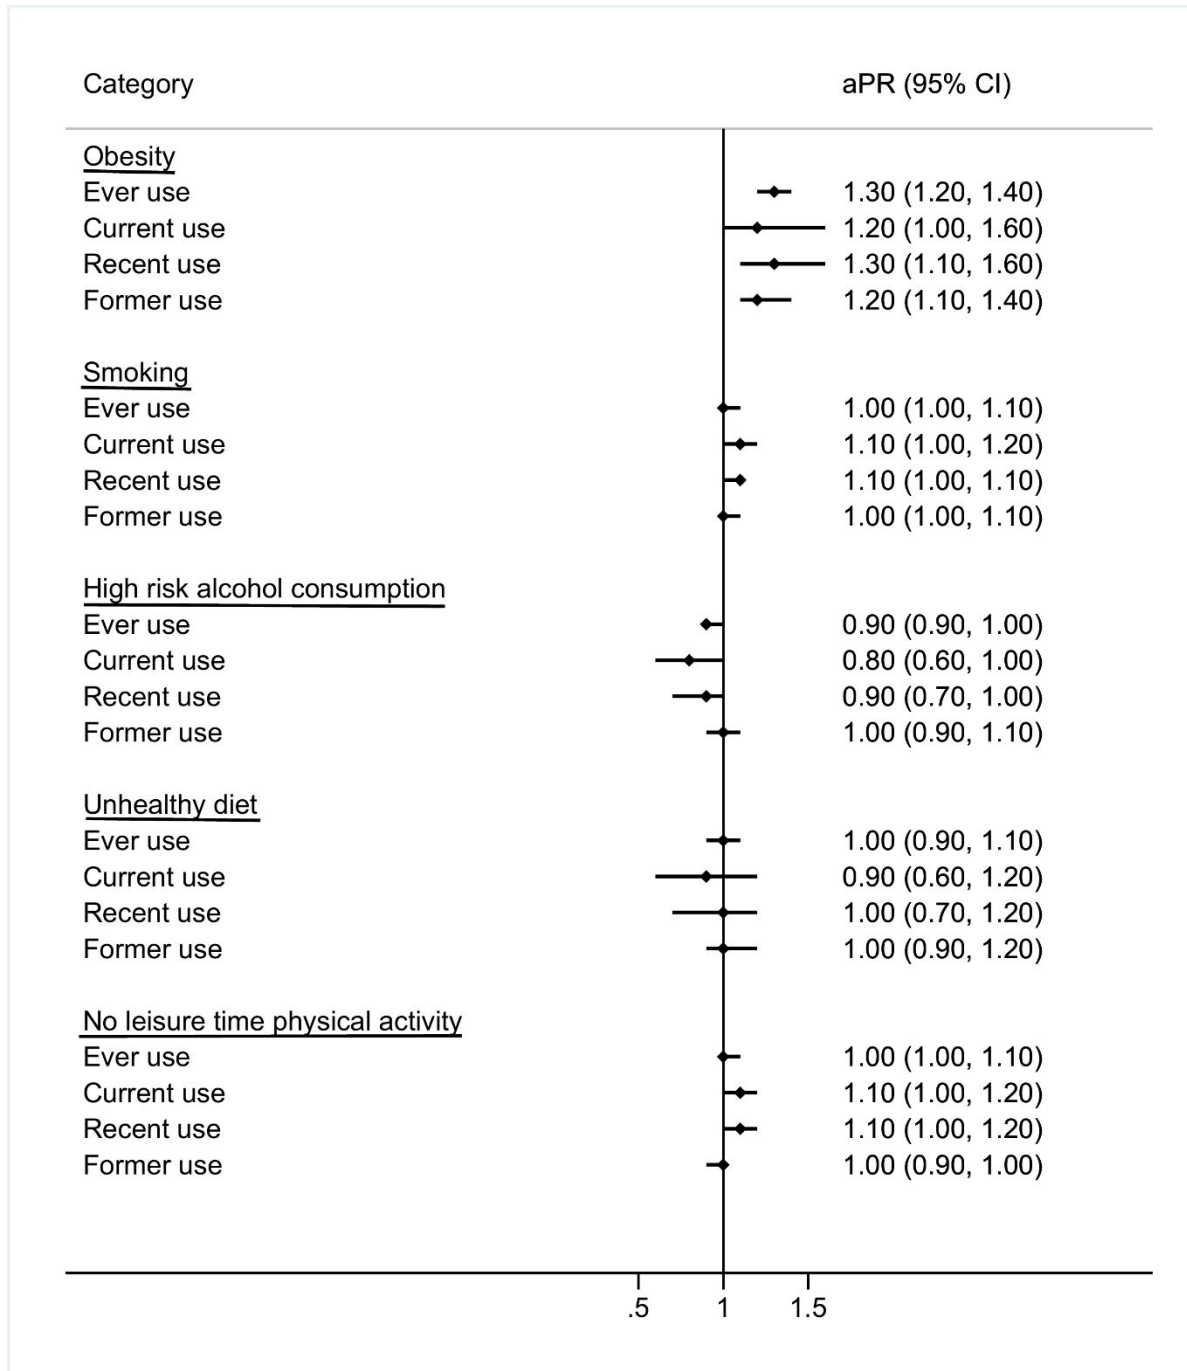

COPD was defined as at least two prescriptions for a long-acting beta2 agonist (LABA), a long-acting muscarinic receptor antagonist (LAMA), or an inhaled corticosteroid (ICS) (or combination thereof) after age 40, and no prescriptions for these agents redeemed at or before age 40.

1  
2  
3  
4  
5  
6  
7  
8  
9  
10  
11  
12  
13  
14  
15  
16  
17  
18  
19  
20  
21  
22  
23  
24  
25  
26  
27  
28  
29  
30  
31  
32  
33  
34  
35  
36  
37  
38  
39  
40  
41  
42  
43  
44  
45  
46  
47  
48  
49  
50  
51  
52  
53  
54  
55  
56  
57  
58  
59  
60

For peer review only

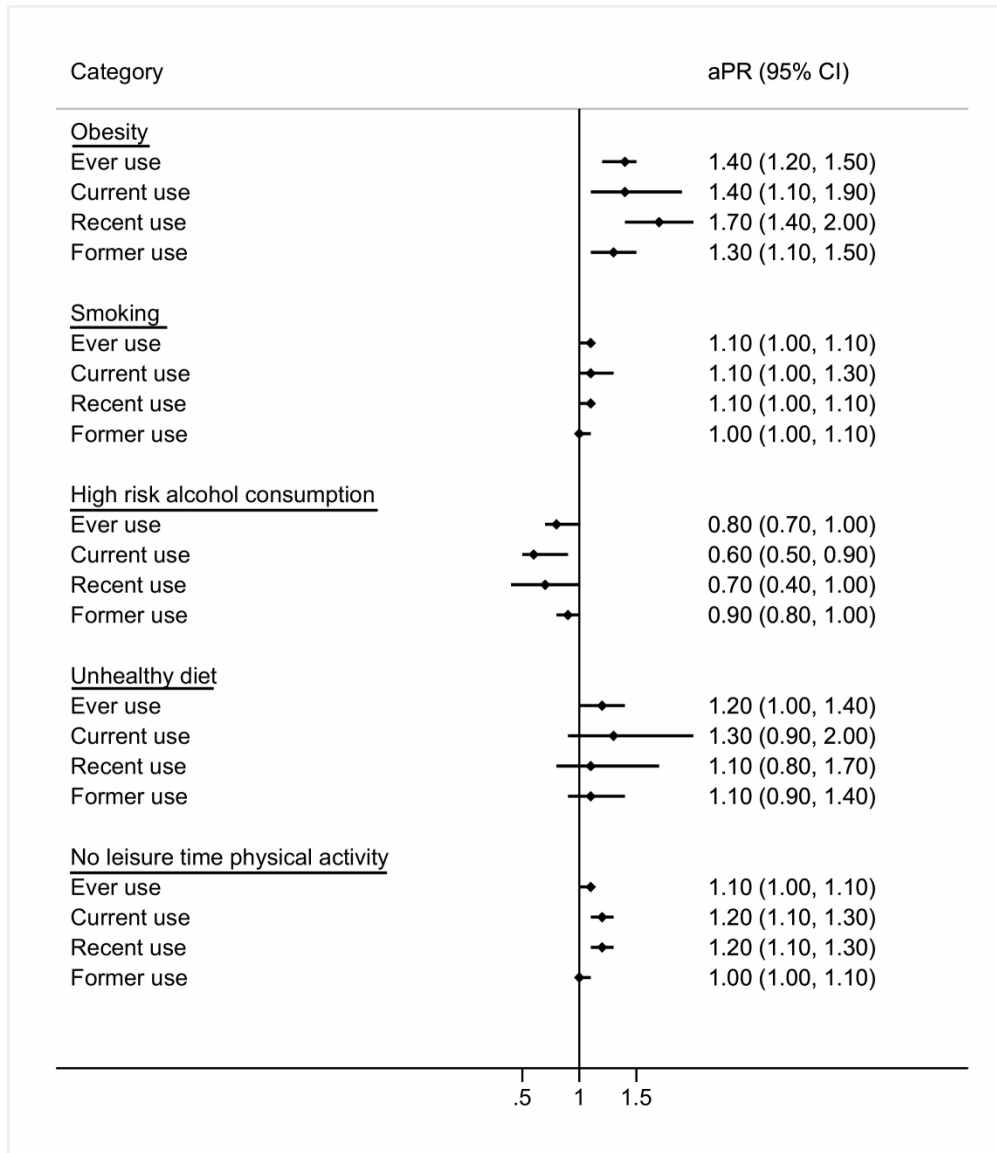

Age-adjusted prevalence ratios (aPRs) and 95% confidence intervals (CIs) for lifestyle factors comparing glucocorticoid users to never users in women.

193x223mm (300 x 300 DPI)



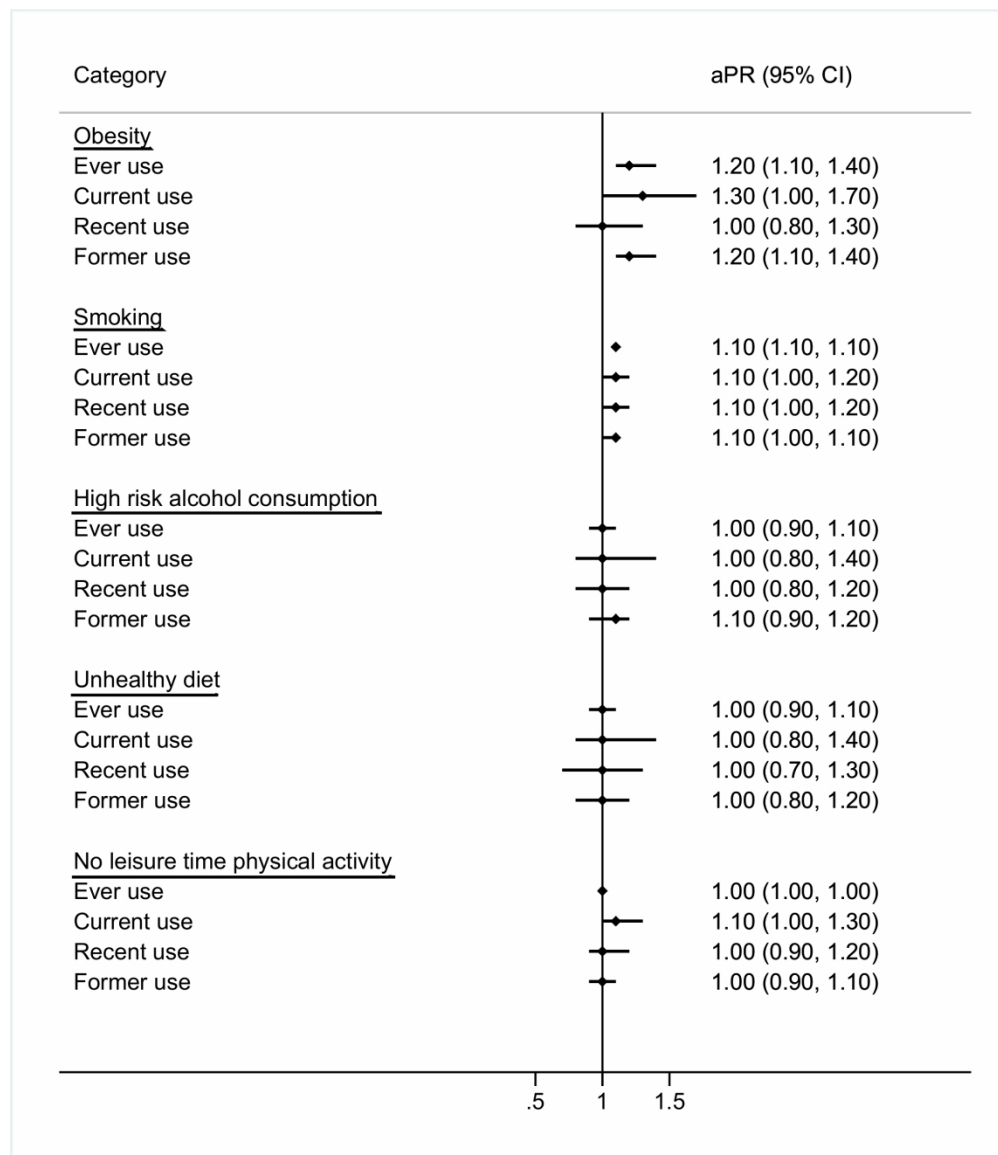

Age-adjusted prevalence ratios (aPRs) and 95% confidence intervals (CIs) for lifestyle factors comparing glucocorticoid users to never users in men.

190x219mm (300 x 300 DPI)

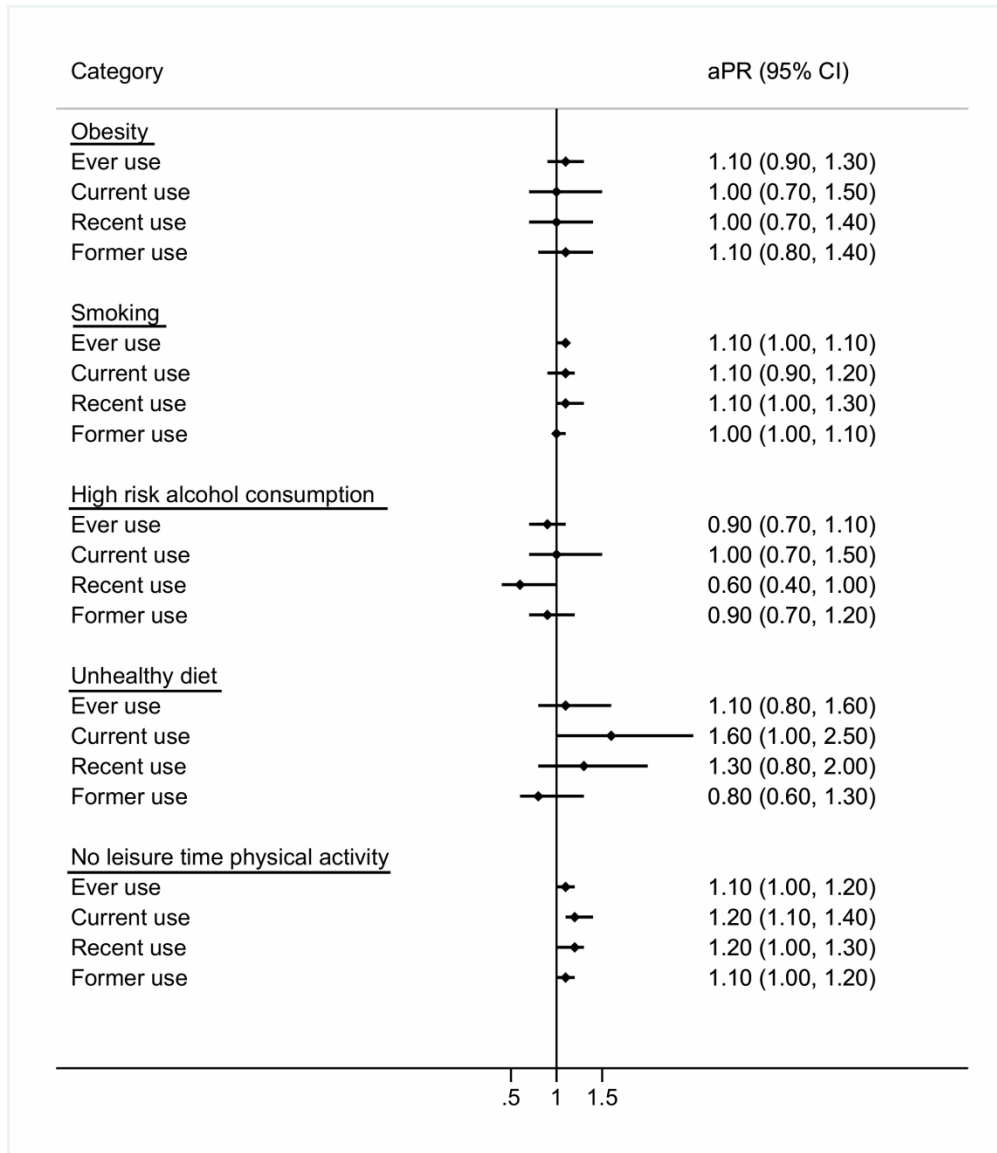

Age-adjusted prevalence ratios (aPRs) and 95% confidence intervals (CIs) for lifestyle factors comparing glucocorticoid users to never users in people with chronic obstructive pulmonary disease (COPD).  
 Age-adjusted prevalence ratios (aPRs) and 95% confidence intervals (CIs) for lifestyle factors comparing glucocorticoid users to never users in people with chronic obstructive pulmonary disease (COPD)

201x232mm (300 x 300 DPI)

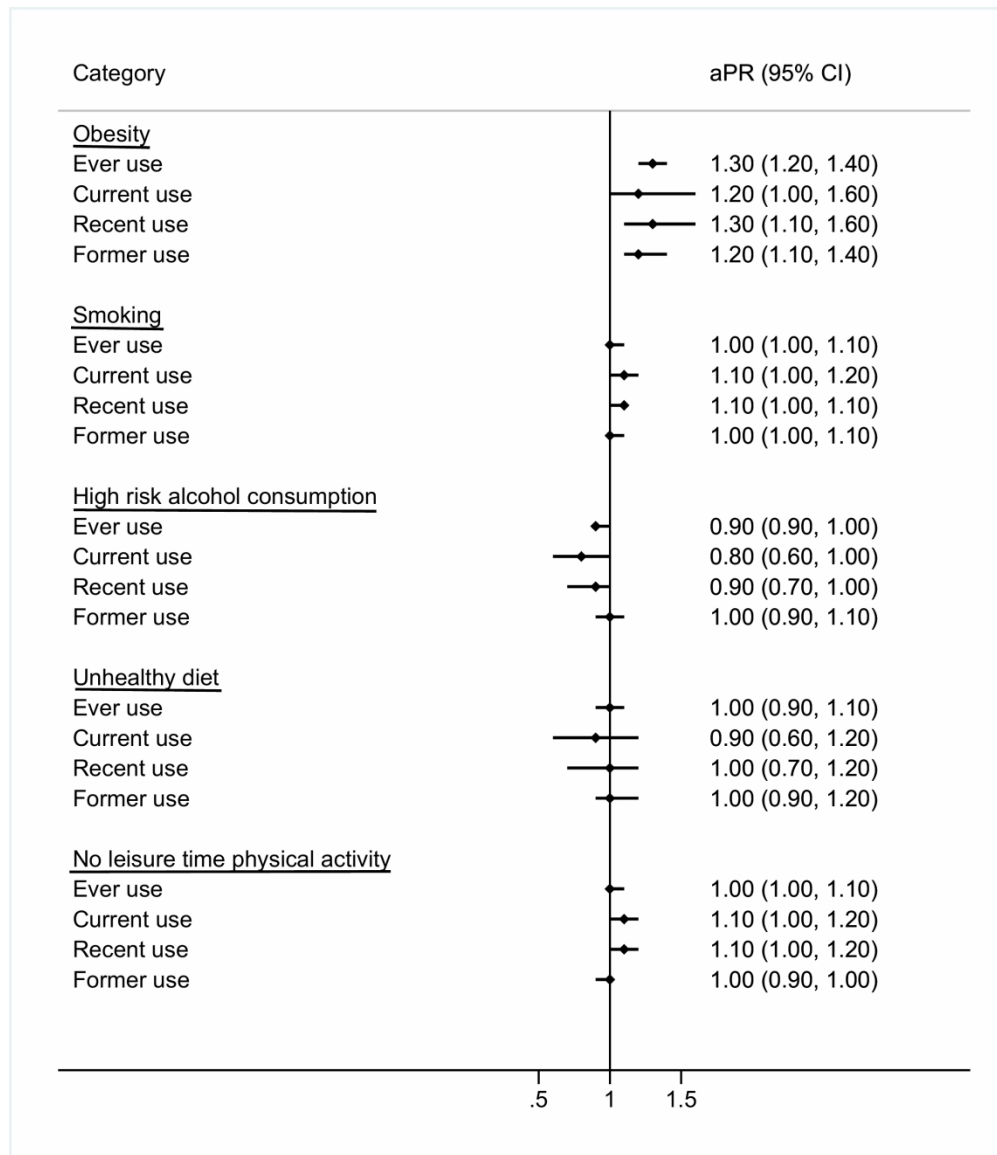

Age-adjusted prevalence ratios (aPRs) and 95% confidence intervals (CIs) for lifestyle factors comparing glucocorticoid users to never users in people with no chronic obstructive pulmonary disease (COPD).

203x234mm (300 x 300 DPI)

1  
2  
3 **SUPPLEMENTARY**  
4

5 **Supplementary Table 1. Anatomical Therapeutic Classification (ATC) codes**

6

| Medication                      | ATC codes |
|---------------------------------|-----------|
| <b>Systemic glucocorticoids</b> | H02AB     |
| <b>Inhaled medications</b>      |           |
| Salmeterol                      | R03AC12   |
| Formeterol                      | R03AC13   |
| Indacaterol                     | R03AC18   |
| Olodaterol                      | R03AC19   |
| Tiotropium                      | R03BB04   |
| Aclidinium                      | R03BB05   |
| Glycopyrronium                  | R03BB06   |
| Umeclidinium                    | R03BB07   |
| Salmeterol and fluticasone      | R03AK06   |
| Formeterol and budesonide       | R03AK07   |
| Formeterol and beclomethasone   | R03AK08   |
| Vilanterol and fluticasone      | R03AK10   |
| Formeterol and fluticasone      | R03AK11   |
| Beclomethasone                  | R03BA01   |
| Budesonide                      | R03BA02   |
| Flunisolide                     | R03BA03   |
| Fluticasone                     | R03BA05   |
| Mometasone                      | R03BA07   |
| Ciclesonide                     | R03BA08   |
| Vilanterol and umeclidinium     | R03AL03   |
| Indacaterol and glycopyrronium  | R03AL04   |
| Formeterol and aclidinium       | R03AL05   |
| Olodaterol and tiotropium       | R03AL06   |
| Beclomethasone                  | R03BA01   |
| Budesonide                      | R03BA02   |
| Flunisolide                     | R03BA03   |
| Fluticasone                     | R03BA05   |
| Mometasone                      | R03BA07   |
| Ciclesonide                     | R03BA08   |

45

**Supplementary Table 2. Prevalence of lifestyle factors according to current new use and current continuing use of glucocorticoid in women and men. Percentages are weighted**

|                                                                            | Women                    |                                    | Men                      |                                    |
|----------------------------------------------------------------------------|--------------------------|------------------------------------|--------------------------|------------------------------------|
|                                                                            | Current new use<br>N (%) | Current continuing<br>use<br>N (%) | Current new use<br>N (%) | Current continuing<br>use<br>N (%) |
| <b>All</b>                                                                 | 78 (100)                 | 223 (100)                          | 77 (100)                 | 185 (100)                          |
| <b>Median age<br/>(range), years</b>                                       | 59 (26-88)               | 67 (28-94)                         | 59 (28-92)               | 68 (32-94)                         |
| <b>Body Mass Index</b>                                                     |                          |                                    |                          |                                    |
| < 18.5                                                                     | <5 (-)                   | 14 (6.3)                           | <5 (-)                   | 5 (4.8)                            |
| 18.5-24                                                                    | 42 (51)                  | 84 (34)                            | 23 (25)                  | 65 (37)                            |
| 25-29                                                                      | 21 (30)                  | 68 (31)                            | 35 (50)                  | 81 (38)                            |
| ≥30                                                                        | 8 (8.2)                  | 42 (21)                            | 17 (20)                  | 30 (18)                            |
| Missing                                                                    | <5 (-)                   | 15 (8.1)                           | <5 (-)                   | <5 (-)                             |
| <b>Smoking</b>                                                             |                          |                                    |                          |                                    |
| Current                                                                    | 20 (25)                  | 46 (18)                            | 22 (32)                  | 42 (25)                            |
| Former                                                                     | 26 (31)                  | 85 (37)                            | 39 (47)                  | 87 (42)                            |
| Never                                                                      | 30 (43)                  | 77 (39)                            | 15 (20)                  | 52 (30)                            |
| Missing                                                                    | <5 (-)                   | 15 (5.8)                           | <5 (-)                   | <5 (2.5)                           |
| <b>Diet</b>                                                                |                          |                                    |                          |                                    |
| Unhealthy                                                                  | < 5 (-)                  | 25 (11)                            | 16 (18)                  | 31 (14)                            |
| Reasonably<br>healthy                                                      | 49 (63)                  | 132 (62)                           | 51 (71)                  | 108 (58)                           |
| Healthy                                                                    | 22 (28)                  | 50 (20)                            | 8 (7.4)                  | 30 (16)                            |
| Missing                                                                    | < 5 (-)                  | 16 (5.9)                           | <5 (-)                   | 16 (12)                            |
| <b>Alcohol intake</b>                                                      |                          |                                    |                          |                                    |
| Low risk<br>consumption                                                    | 65 (86)                  | 166 (77)                           | 55 (71)                  | 129 (70)                           |
| High risk<br>consumption                                                   | 12 (13)                  | 31 (12)                            | 18 (19)                  | 44 (22)                            |
| Missing                                                                    | <5 (-)                   | 26 (11)                            | <5 (-)                   | 12 (8.0)                           |
| <b>Participation in<br/>regular leisure<br/>time physical<br/>activity</b> |                          |                                    |                          |                                    |
| No                                                                         | 38 (46)                  | 133 (63)                           | 50 (65)                  | 125 (65)                           |
| Yes                                                                        | 39 (53)                  | 82 (34)                            | 26 (33)                  | 56 (32)                            |
| Missing                                                                    | <5 (-)                   | <5 (-)                             | <5 (-)                   | <5 (-)                             |

Current new use: First-ever redemption of a prescription  $\leq$  90 days before completing the questionnaire. Current continuing use: First-ever prescription redemption more than 90 days before completing the questionnaire, but most recent prescription  $\leq$  90 days.

**Supplementary Table 3a. Prevalence of lifestyle factors according to total number of redeemed prescriptions of systemic glucocorticoids before filling in the questionnaire in women. Percentages are weighted**

|                                                                        | One<br>N (%) | Two-five<br>N (%) | > Five<br>N (%) |
|------------------------------------------------------------------------|--------------|-------------------|-----------------|
| <b>All</b>                                                             | 1,164 (100)  | 944 (100)         | 352 (100)       |
| <b>Median age (range)</b>                                              | 58 (25-97)   | 58 (25-98)        | 67 (25-98)      |
| <b>Body Mass Index</b>                                                 |              |                   |                 |
| < 18.5                                                                 | 28 (2.9)     | 18 (2.3)          | 12 (2.7)        |
| 18.5-24                                                                | 558 (47)     | 416 (44)          | 139 (38)        |
| 25.0-29                                                                | 343 (28)     | 271 (28)          | 103 (29)        |
| ≥30                                                                    | 190 (16)     | 185 (20)          | 69 (21)         |
| Missing                                                                | 45 (5.5)     | 54 (6.1)          | 29 (9.0)        |
| <b>Smoking</b>                                                         |              |                   |                 |
| Current                                                                | 257 (21)     | 220 (23)          | 75 (19)         |
| Former                                                                 | 341 (28)     | 297 (31)          | 127 (35)        |
| Never                                                                  | 530 (47)     | 391 (42)          | 126 (39)        |
| Missing                                                                | 36 (3.5)     | 36 (4.2)          | 24 (6.6)        |
| <b>Diet</b>                                                            |              |                   |                 |
| Unhealthy                                                              | 79 (6.4)     | 87 (9.7)          | 25 (8.0)        |
| Reasonably<br>healthy                                                  | 669 (58)     | 546 (57)          | 210 (61)        |
| Healthy                                                                | 371 (31)     | 271 (29)          | 88 (23)         |
| Missing                                                                | 45 (4.7)     | 40 (4.9)          | 29 (7.6)        |
| <b>Alcohol intake</b>                                                  |              |                   |                 |
| Low risk consumption                                                   | 857 (75)     | 714 (77)          | 261 (74)        |
| High risk consumption                                                  | 238 (18)     | 171 (16)          | 49 (13)         |
| Missing                                                                | 69 (7.2)     | 59 (7.0)          | 42 (13)         |
| <b>Participation in regular<br/>leisure time physical<br/>activity</b> |              |                   |                 |
| No                                                                     | 517 (45)     | 464 (51)          | 198 (59)        |
| Yes                                                                    | 609 (51)     | 460 (47)          | 140 (38)        |
| Missing                                                                | 38 (3.9)     | 20 (2.4)          | 14 (3.0)        |

**Supplementary Table 3b. Prevalence of lifestyle factors according to total number of redeemed prescriptions of systemic glucocorticoids before filling in the questionnaire in men. Percentages are weighted**

|                                                                | One<br>N (%) | Two-five<br>N (%) | > Five<br>N (%) |
|----------------------------------------------------------------|--------------|-------------------|-----------------|
| <b>All</b>                                                     | 993 (100)    | 759 (100)         | 290 (100)       |
| <b>Median age (range)</b>                                      | 58 (25-100)  | 60 (25-91)        | 64 (25-94)      |
| <b>Body Mass Index</b>                                         |              |                   |                 |
| < 18.5                                                         | 5 (0.5)      | 10 (1.9)          | 6 (2.0)         |
| 18.5-24                                                        | 314 (33)     | 226 (30)          | 104 (29)        |
| 25.0-29                                                        | 458 (46)     | 377 (49)          | 124 (40)        |
| ≥30                                                            | 190 (18)     | 127 (16)          | 48 (16)         |
| Missing                                                        | 26 (2.7)     | 19 (2.6)          | 8 (3.1)         |
| <b>Smoking</b>                                                 |              |                   |                 |
| Current                                                        | 272 (29)     | 191 (27)          | 55 (20)         |
| Former                                                         | 400 (38)     | 302 (36)          | 141 (44)        |
| Never                                                          | 297 (31)     | 246 (34)          | 87 (33)         |
| Missing                                                        | 24 (2.5)     | 20 (3.2)          | 7 (2.7)         |
| <b>Diet</b>                                                    |              |                   |                 |
| Unhealthy                                                      | 148 (16)     | 116 (16)          | 46 (13)         |
| Reasonably                                                     | 645 (66)     | 484 (64)          | 172 (61)        |
| healthy                                                        |              |                   |                 |
| Healthy                                                        | 168 (15)     | 119 (14)          | 55 (18)         |
| Missing                                                        | 32 (3.8)     | 40 (5.9)          | 17 (7.6)        |
| <b>Alcohol intake</b>                                          |              |                   |                 |
| Low risk consumption                                           | 722 (72)     | 562 (72)          | 205 (68)        |
| High risk consumption                                          | 226 (23)     | 157 (21)          | 60 (20)         |
| Missing                                                        | 45 (5.2)     | 40 (6.7)          | 25 (11)         |
| <b>Participation in regular leisure time physical activity</b> |              |                   |                 |
| Yes                                                            | 526 (51)     | 426 (56)          | 176 (59)        |
| No                                                             | 446 (47)     | 322 (42)          | 106 (38)        |
| Missing                                                        | 21 (2.4)     | 11 (2.0)          | 8 (2.1)         |

**Supplementary Table 4. Age-adjusted prevalence ratios (aPRs) and 95% confidence intervals (CIs) for lifestyle factors comparing glucocorticoid users to never users, stratified by sex.**

| Category                             | aPR (95% CI)     |                  |
|--------------------------------------|------------------|------------------|
|                                      | Women            | Men              |
| <b>Obesity</b>                       |                  |                  |
| Current new use                      | 0.7 (0.3 to 1.4) | 1.4 (0.9 to 2.3) |
| Current continuing use               | 1.7 (1.2 to 1.6) | 1.4 (1.0 to 1.3) |
| One prescription in total            | 1.2 (1.0 to 1.4) | 1.3 (1.1 to 1.5) |
| Two-five prescriptions in total      | 1.5 (1.3 to 1.8) | 1.1 (0.9 to 1.4) |
| Over five prescriptions in total     | 1.7 (1.4 to 2.2) | 1.2 (0.9 to 1.6) |
| <b>Ever smoking</b>                  |                  |                  |
| Current new use                      | 1.1 (0.9 to 1.4) | 1.3 (1.1 to 1.4) |
| Current continuing use               | 1.1 (1.0 to 1.1) | 1.0 (1.0 to 1.1) |
| One prescription in total            | 1.0 (0.9 to 1.1) | 1.1 (1.1 to 1.2) |
| Two-five prescriptions in total      | 1.1 (1.0 to 1.2) | 1.1 (1.0 to 1.2) |
| Over five prescriptions in total     | 1.1 (1.0 to 1.3) | 1.0 (0.9 to 1.2) |
| <b>High risk alcohol consumption</b> |                  |                  |
| Current new use                      | 0.6 (0.9 to 1.0) | 0.9 (0.8 to 1.4) |
| Current continuing use               | 0.6 (0.3 to 1.0) | 1.1 (0.9 to 1.2) |
| One prescription in total            | 0.9 (0.8 to 1.0) | 1.0 (0.9 to 1.2) |
| Two-five prescriptions in total      | 0.8 (0.7 to 0.9) | 1.0 (0.8 to 1.2) |
| Over five prescriptions in total     | 0.7 (0.5 to 1.0) | 1.1 (0.8 to 1.4) |
| <b>Unhealthy diet</b>                |                  |                  |
| Current new use                      | 0.6 (0.2 to 1.9) | 1.1 (0.7 to 1.9) |



|                                                                   |                  |                  |
|-------------------------------------------------------------------|------------------|------------------|
| Current continuing use                                            | 1.5 (0.9 to 2.4) | 1.0 (0.9 to 1.1) |
| One prescription in total                                         | 0.9 (0.7 to 1.2) | 1.0 (0.8 to 1.2) |
| Two-five prescriptions in total                                   | 1.4 (1.1 to 1.8) | 1.0 (0.9 to 1.3) |
| Over five prescriptions in total                                  | 1.1 (0.7 to 1.7) | 0.9 (0.6 to 1.2) |
| <b>No participation in regular leisure time physical activity</b> |                  |                  |
| Current new use                                                   | 0.9 (0.7 to 1.3) | 1.2 (1.0 to 1.4) |
| Current continuing use                                            | 1.3 (1.0 to 1.1) | 1.1 (1.0 to 1.3) |
| One prescription in total                                         | 1.0 (0.9 to 1.1) | 1.0 (0.9 to 1.0) |
| Two-five prescriptions in total                                   | 1.1 (1.0 to 1.2) | 1.1 (1.0 to 1.1) |
| Over five prescriptions in total                                  | 1.2 (1.1 to 1.3) | 1.1 (1.0 to 1.2) |

---

Current new use: First-ever redemption of a prescription  $\leq 90$  days before completing the questionnaire. Current continuing use: First-ever prescription redemption more than 90 days before completing the questionnaire, but most recent prescription  $\leq 90$  days.

**Supplementary Table 5. Age-adjusted prevalence ratios (aPRs) and 95% confidence intervals (CIs) for lifestyle factors comparing glucocorticoid users to never users, stratified by chronic obstructive pulmonary disease (COPD).**

| Category                             | aPR              |                  |
|--------------------------------------|------------------|------------------|
|                                      | COPD             | No COPD          |
| <b>Obesity</b>                       |                  |                  |
| Current new use                      | 0.7 (0.2 to 2.1) | 1.1 (0.7 to 1.7) |
| Current continuing use               | 1.2 (0.8 to 1.3) | 1.5 (1.1 to 2.0) |
| One prescription in total            | 1.1 (0.8 to 1.6) | 1.2 (1.1 to 1.3) |
| Two-five prescriptions in total      | 1.0 (0.8 to 1.6) | 1.3 (1.2 to 1.5) |
| Over five prescriptions in total     | 1.1 (0.8 to 1.6) | 1.4 (1.2 to 1.8) |
| <b>Ever smoking</b>                  |                  |                  |
| Current new use                      | 1.2 (1.0 to 1.5) | 1.2 (1.0 to 1.4) |
| Current continuing use               | 1.0 (0.9 to 1.2) | 1.0 (0.9 to 1.1) |
| One prescription in total            | 1.0 (0.9 to 1.2) | 1.1 (1.0 to 1.1) |
| Two-five prescriptions in total      | 1.1 (1.0 to 1.2) | 1.0 (1.0 to 1.1) |
| Over five prescriptions in total     | 1.0 (0.9 to 1.2) | 1.1 (1.0 to 1.2) |
| <b>High risk alcohol consumption</b> |                  |                  |
| Current new use                      | 0.9 (0.4 to 2.2) | 0.7 (0.5 to 1.2) |
| Current continuing use               | 1.0 (0.7 to 1.5) | 0.8 (0.6 to 1.1) |
| One prescription in total            | 0.7 (0.5 to 1.0) | 1.0 (0.9 to 1.1) |
| Two-five prescriptions in total      | 1.1 (0.8 to 1.4) | 0.8 (0.7 to 1.0) |
| Over five prescriptions in total     | 0.8 (0.5 to 1.2) | 1.0 (0.8 to 1.2) |
| <b>Unhealthy diet</b>                |                  |                  |
| Current new use                      | 1.7 (0.7 to 4.4) | 0.9 (0.5 to 1.5) |

|                                                                   |                  |                  |
|-------------------------------------------------------------------|------------------|------------------|
| Current continuing use                                            | 1.6 (1.0 to 1.3) | 0.9 (0.6 to 1.3) |
| One prescription in total                                         | 0.7 (0.4 to 1.1) | 1.0 (0.8 to 1.2) |
| Two-five prescriptions in total                                   | 1.4 (1.0 to 2.1) | 1.0 (0.9 to 1.3) |
| Over five prescriptions in total                                  | 1.0 (0.6 to 1.6) | 0.9 (0.6 to 1.2) |
| <b>No participation in regular leisure time physical activity</b> |                  |                  |
| Current new use                                                   | 1.1 (0.8 to 1.5) | 1.1 (0.9 to 1.3) |
| Current continuing use                                            | 1.2 (1.1 to 1.4) | 1.2 (1.0 to 1.3) |
| One prescription in total                                         | 1.1 (1.0 to 1.3) | 1.0 (0.9 to 1.0) |
| Two-five prescriptions in total                                   | 1.1 (1.0 to 1.2) | 1.1 (1.0 to 1.1) |
| Over five prescriptions in total                                  | 1.2 (1.0 to 1.4) | 1.1 (1.0 to 1.2) |

---

COPD was defined as at least two prescriptions for a long-acting beta2 agonist (LABA), a long-acting muscarinic receptor antagonist (LAMA), or an inhaled corticosteroid (ICS) (or combination thereof) after age 40, and no prescriptions for these agents redeemed at or before age 40. Current new use: First-ever redemption of a prescription  $\leq 90$  days before completing the questionnaire. Current continuing use: First-ever prescription redemption more than 90 days before completing the questionnaire, but most recent prescription  $\leq 90$  days.

1  
2  
3  
4  
5  
6  
7  
8  
9  
10  
11  
12  
13  
14  
15  
16  
17  
18  
19  
20  
21  
22  
23  
24  
25  
26  
27  
28  
29  
30  
31  
32  
33  
34  
35  
36  
37  
38  
39  
40  
41  
42  
43  
44  
45  
46  
47  
48  
49  
50  
51  
52  
53  
54  
55  
56  
57  
58  
59  
60

For peer review only

**STROBE 2007 (v4) checklist of items to be included in reports of observational studies in epidemiology\***  
**Checklist for cohort, case-control, and cross-sectional studies (combined)**

| Section/Topic             | Item # | Recommendation                                                                                                                                                                                                                                                                                                                                                                                                                                                         | Reported on page # |
|---------------------------|--------|------------------------------------------------------------------------------------------------------------------------------------------------------------------------------------------------------------------------------------------------------------------------------------------------------------------------------------------------------------------------------------------------------------------------------------------------------------------------|--------------------|
| Title and abstract        | 1      | (a) Indicate the study’s design with a commonly used term in the title or the abstract                                                                                                                                                                                                                                                                                                                                                                                 | 1,2                |
|                           |        | (b) Provide in the abstract an informative and balanced summary of what was done and what was found                                                                                                                                                                                                                                                                                                                                                                    | 2,3                |
| <b>Introduction</b>       |        |                                                                                                                                                                                                                                                                                                                                                                                                                                                                        |                    |
| Background/rationale      | 2      | Explain the scientific background and rationale for the investigation being reported                                                                                                                                                                                                                                                                                                                                                                                   | 4                  |
| Objectives                | 3      | State specific objectives, including any pre-specified hypotheses                                                                                                                                                                                                                                                                                                                                                                                                      | 4                  |
| <b>Methods</b>            |        |                                                                                                                                                                                                                                                                                                                                                                                                                                                                        |                    |
| Study design              | 4      | Present key elements of study design early in the paper                                                                                                                                                                                                                                                                                                                                                                                                                | 4                  |
| Setting                   | 5      | Describe the setting, locations, and relevant dates, including periods of recruitment, exposure, follow-up, and data collection                                                                                                                                                                                                                                                                                                                                        | 5,6,7              |
| Participants              | 6      | (a) <i>Cohort study</i> —Give the eligibility criteria, and the sources and methods of selection of participants. Describe methods of follow-up<br><i>Case-control study</i> —Give the eligibility criteria, and the sources and methods of case ascertainment and control selection. Give the rationale for the choice of cases and controls<br><i>Cross-sectional study</i> —Give the eligibility criteria, and the sources and methods of selection of participants | 5                  |
|                           |        | (b) <i>Cohort study</i> —For matched studies, give matching criteria and number of exposed and unexposed<br><i>Case-control study</i> —For matched studies, give matching criteria and the number of controls per case                                                                                                                                                                                                                                                 | Not relevant       |
| Variables                 | 7      | Clearly define all outcomes, exposures, predictors, potential confounders, and effect modifiers. Give diagnostic criteria, if applicable                                                                                                                                                                                                                                                                                                                               | 5,6,7              |
| Data sources/ measurement | 8*     | For each variable of interest, give sources of data and details of methods of assessment (measurement). Describe comparability of assessment methods if there is more than one group                                                                                                                                                                                                                                                                                   | 5,6,7              |
| Bias                      | 9      | Describe any efforts to address potential sources of bias                                                                                                                                                                                                                                                                                                                                                                                                              | 7                  |
| Study size                | 10     | Explain how the study size was arrived at                                                                                                                                                                                                                                                                                                                                                                                                                              | 5                  |
| Quantitative variables    | 11     | Explain how quantitative variables were handled in the analyses. If applicable, describe which groupings were chosen and why                                                                                                                                                                                                                                                                                                                                           | 5,6,7              |
| Statistical methods       | 12     | (a) Describe all statistical methods, including those used to control for confounding                                                                                                                                                                                                                                                                                                                                                                                  | 7                  |
|                           |        | (b) Describe any methods used to examine subgroups and interactions                                                                                                                                                                                                                                                                                                                                                                                                    | 7                  |
|                           |        | (c) Explain how missing data were addressed                                                                                                                                                                                                                                                                                                                                                                                                                            | 8,9,10             |
|                           |        | (d) <i>Cohort study</i> —If applicable, explain how loss to follow-up was addressed<br><i>Case-control study</i> —If applicable, explain how matching of cases and controls was addressed                                                                                                                                                                                                                                                                              | Not applicable     |

|                          |     |                                                                                                                                                                                                              |                |
|--------------------------|-----|--------------------------------------------------------------------------------------------------------------------------------------------------------------------------------------------------------------|----------------|
|                          |     | <i>Cross-sectional study</i> —If applicable, describe analytical methods taking account of sampling strategy                                                                                                 |                |
|                          |     | (e) Describe any sensitivity analyses                                                                                                                                                                        | Not applicable |
| <b>Results</b>           |     |                                                                                                                                                                                                              |                |
| Participants             | 13* | (a) Report numbers of individuals at each stage of study—eg numbers potentially eligible, examined for eligibility, confirmed eligible, included in the study, completing follow-up, and analysed            | 5              |
|                          |     | (b) Give reasons for non-participation at each stage                                                                                                                                                         | Not applicable |
|                          |     | (c) Consider use of a flow diagram                                                                                                                                                                           | Not applicable |
| Descriptive data         | 14* | (a) Give characteristics of study participants (eg demographic, clinical, social) and information on exposures and potential confounders                                                                     | 8,9,10,11      |
|                          |     | (b) Indicate number of participants with missing data for each variable of interest                                                                                                                          | 8,9,10,11      |
|                          |     | (c) <i>Cohort study</i> —Summarise follow-up time (eg, average and total amount)                                                                                                                             | Not applicable |
| Outcome data             | 15* | <i>Cohort study</i> —Report numbers of outcome events or summary measures over time                                                                                                                          | Not applicable |
|                          |     | <i>Case-control study</i> —Report numbers in each exposure category, or summary measures of exposure                                                                                                         | Not applicable |
|                          |     | <i>Cross-sectional study</i> —Report numbers of outcome events or summary measures                                                                                                                           | 8,9,10         |
| Main results             | 16  | (a) Give unadjusted estimates and, if applicable, confounder-adjusted estimates and their precision (eg, 95% confidence interval). Make clear which confounders were adjusted for and why they were included | 10,11          |
|                          |     | (b) Report category boundaries when continuous variables were categorized                                                                                                                                    | 8,9,10         |
|                          |     | (c) If relevant, consider translating estimates of relative risk into absolute risk for a meaningful time period                                                                                             | Not applicable |
| Other analyses           | 17  | Report other analyses done—eg analyses of subgroups and interactions, and sensitivity analyses                                                                                                               | Supplementary  |
| <b>Discussion</b>        |     |                                                                                                                                                                                                              |                |
| Key results              | 18  | Summarise key results with reference to study objectives                                                                                                                                                     | 11             |
| Limitations              | 19  | Discuss limitations of the study, taking into account sources of potential bias or imprecision. Discuss both direction and magnitude of any potential bias                                                   | 8,9            |
| Interpretation           | 20  | Give a cautious overall interpretation of results considering objectives, limitations, multiplicity of analyses, results from similar studies, and other relevant evidence                                   | 8              |
| Generalisability         | 21  | Discuss the generalisability (external validity) of the study results                                                                                                                                        | 8,9            |
| <b>Other information</b> |     |                                                                                                                                                                                                              |                |
| Funding                  | 22  | Give the source of funding and the role of the funders for the present study and, if applicable, for the original study on which the present article is based                                                | 14             |

\*Give information separately for cases and controls in case-control studies and, if applicable, for exposed and unexposed groups in cohort and cross-sectional studies.

**Note:** An Explanation and Elaboration article discusses each checklist item and gives methodological background and published examples of transparent reporting. The STROBE checklist is best used in conjunction with this article (freely available on the Web sites of PLoS Medicine at <http://www.plosmedicine.org/>, Annals of Internal Medicine at <http://www.annals.org/>, and Epidemiology at <http://www.epidem.com/>). Information on the STROBE Initiative is available at [www.strobe-statement.org](http://www.strobe-statement.org).

# BMJ Open

## Prevalence of lifestyle characteristics in glucocorticoid users and nonusers: A Danish population-based cross-sectional study

|                                 |                                                                                                                                                                                                                                                                                                                                                                                                                                                                                                                                                                               |
|---------------------------------|-------------------------------------------------------------------------------------------------------------------------------------------------------------------------------------------------------------------------------------------------------------------------------------------------------------------------------------------------------------------------------------------------------------------------------------------------------------------------------------------------------------------------------------------------------------------------------|
| Journal:                        | <i>BMJ Open</i>                                                                                                                                                                                                                                                                                                                                                                                                                                                                                                                                                               |
| Manuscript ID                   | bmjopen-2019-030780.R1                                                                                                                                                                                                                                                                                                                                                                                                                                                                                                                                                        |
| Article Type:                   | Original research                                                                                                                                                                                                                                                                                                                                                                                                                                                                                                                                                             |
| Date Submitted by the Author:   | 09-Sep-2019                                                                                                                                                                                                                                                                                                                                                                                                                                                                                                                                                                   |
| Complete List of Authors:       | Laugesen, Kristina; Aarhus University Hospital, Department of Clinical Epidemiology<br>Petersen, Irene; University College London Medical School, Department of Primary Care and Population health<br>Pedersen, Lars; Aarhus University Hospital, Department of Clinical Epidemiology<br>Breinholt Larsen, Finn; Public Health and Quality Improvement, Central Denmark Region<br>Jørgensen, Jens Otto; Aarhus University Hospital, Department of Endocrinology and Internal Medicine<br>Sørensen, Henrik T.; Aarhus University Hospital, Department of Clinical Epidemiology |
| <b>Primary Subject Heading</b>: | Epidemiology                                                                                                                                                                                                                                                                                                                                                                                                                                                                                                                                                                  |
| Secondary Subject Heading:      | Pharmacology and therapeutics, Public health                                                                                                                                                                                                                                                                                                                                                                                                                                                                                                                                  |
| Keywords:                       | glucocorticoids, smoking, alcohol drinking, exercise, body mass index, EPIDEMIOLOGY                                                                                                                                                                                                                                                                                                                                                                                                                                                                                           |
|                                 |                                                                                                                                                                                                                                                                                                                                                                                                                                                                                                                                                                               |

SCHOLARONE™  
Manuscripts

1  
2  
3 **Prevalence of lifestyle characteristics in glucocorticoid users and nonusers: A Danish**  
4 **population-based cross-sectional study**  
5  
6  
7

8  
9  
10 **Authors:** Kristina Laugesen;<sup>1</sup> Irene Petersen;<sup>1,2</sup> Lars Pedersen;<sup>1</sup> Finn Breinholt Larsen;<sup>3</sup> Jens  
11 Otto Lunde Jørgensen;<sup>4</sup> Henrik Toft Sørensen<sup>1</sup>  
12  
13

14 **Affiliations:**  
15

16 <sup>1</sup> Department of Clinical Epidemiology, Aarhus University Hospital, Aarhus, Denmark.  
17

18 <sup>2</sup> Department of Primary Care and Population Health, University College London, London, UK  
19

20 <sup>3</sup> DEFACTUM, Public Health & Health Services Research, Central Denmark Region, Aarhus,  
21 Denmark  
22  
23

24 <sup>4</sup> Department of Endocrinology and Internal Medicine, Aarhus University Hospital, Aarhus  
25 Denmark  
26  
27  
28  
29

30  
31  
32 **Correspondence:** Kristina Laugesen, Department of Clinical Epidemiology, Aarhus University  
33 Hospital, Olof Palmes Allé 43-45, 8200 Aarhus N, Denmark. Telephone: +45 871 68063. E-  
34 mail: Kristina.laugesen@clin.au.dk  
35  
36  
37

38  
39 **Word count:** 2,218  
40

41  
42 **Keywords:** glucocorticoids; Body Mass Index; Alcohol Drinking; Exercise; Smoking; Diet  
43  
44  
45  
46  
47  
48  
49  
50  
51  
52  
53  
54  
55  
56  
57  
58  
59  
60



## ABSTRACT

**Objectives:** Lifestyle may affect observed associations between glucocorticoid use and adverse events. This study aimed to investigate whether lifestyle differ according to use of systemic glucocorticoids.

**Design:** Population-based cross-sectional study.

**Setting:** The Central Denmark Region.

**Participants:** 30,245 adults ( $\geq 25$  years of age) who participated in a questionnaire-based public health survey in 2010.

**Outcome measures:** Systemic glucocorticoid use was categorised as never use, current use (prescription redemption  $\leq 90$  days before completing the questionnaire), recent use (prescription redemption 91-365 days before completing the questionnaire), former use (prescription redemption  $> 365$  days before completing the questionnaire) and according to cumulative dose expressed in prednisolone equivalents ( $< 100$ ,  $100 - 499$ ,  $500 - 999$ ,  $1,000 - 1,999$ ,  $2,000 - 4,999$ ,  $\geq 5,000$  mg). We computed the prevalence of lifestyle factors (body mass index, smoking, alcohol intake, physical activity, and dietary habits) according to glucocorticoid use. We then estimated age-adjusted prevalence ratios (aPRs) and 95% confidence intervals (CI), comparing the categories of glucocorticoid users vs. never users. All analyses were stratified by sex.

**Results:** Of the 30,245 participants (53% women, median age 53 years), 563 (1.9%) were current users, 885 (2.9%) were recent users, 3,054 (10%) were former users, and 25,743 (85%) were never users. Ever users of glucocorticoids had a slightly higher prevalence of obesity than never users [18% versus 14%, aPR=1.4, 95% CI 1.2 to 1.5 in women and 17% versus 15%,

1  
2  
3 aPR=1.2, 95% CI 1.1 to 1.4 in men]. In women, ever users of glucocorticoids had a slightly  
4  
5 lower prevalence of high-risk alcohol consumption compared to never users [17% versus 20%,  
6  
7 aPR=0.8, 95% CI 0.7 to 1.0]. Smoking, diet and physical activity did not differ substantially  
8  
9 according to use of glucocorticoids.  
10  
11

12  
13 **Conclusion:** Our study provides a framework for quantifying potential uncontrolled confounding  
14  
15 by lifestyle factors in studies of systemic glucocorticoids.  
16  
17

### 18 19 20 21 **Strengths and limitations of this study**

- 22  
23  
24 • Lifestyle may confound the observed associations between glucocorticoid use and  
25  
26 adverse events in observational studies.
- 27  
28  
29 • This large population-based study may guide assessment of the association between  
30  
31 lifestyle and glucocorticoid use when data on lifestyle factors is not available.
- 32  
33  
34 • The response rate to the questionnaire was 67% and it is possible that the respondents had  
35  
36 a different health profile than non-respondents. To minimize bias due to non-response,  
37  
38 we used a weighting method developed for this particular survey.
- 39  
40  
41 • Information on lifestyle factors was based on self-reported data, which can be prone to  
42  
43 misclassification.
- 44  
45  
46 • As this study had a cross-sectional design, it was unable to evaluate whether lifestyle  
47  
48 predicts glucocorticoid use or vice versa.  
49  
50  
51  
52  
53  
54  
55  
56  
57  
58  
59  
60

## BACKGROUND

Since their introduction in the 1950s, glucocorticoids have been prescribed to treat numerous inflammatory conditions and are widely used with annual prevalence of 3% in Denmark.[1, 2]

However, glucocorticoids also are associated with several adverse events, including truncal obesity, hypertension, dyslipidemia,[3] cardiac disease,[4-7] venous thromboembolism,[6] diabetes mellitus,[8] psychiatric illnesses,[9] and osteoporosis.[10]

Lifestyle factors, including smoking, alcohol consumption, physical inactivity, and obesity, are well-described risk factors for many adverse events associated with glucocorticoids.[11-14]

Moreover, prior studies have found that unhealthy lifestyle is abundant in populations with diseases frequently treated with glucocorticoids, e.g. chronic obstructive pulmonary disease (COPD), inflammatory bowel disease, and rheumatoid arthritis, and also associated with severity of disease development.[15-21] Thus, lifestyle factors potentially can confound observed associations between glucocorticoid exposure and adverse events. Pharmacosurveillance of glucocorticoids is often performed using observational studies, in which control of such confounders is important. However, many data sources used for surveillance lack data on lifestyle. This has been acknowledged as a limitation in prior studies.[6, 22]

To quantify the amount of potential uncontrolled confounding by lifestyle factors in observational studies of systemic glucocorticoids we used data from a population based health survey and conducted a cross-sectional study to examine prevalence of lifestyle factors according to glucocorticoid use.

## METHODS

### Setting

Denmark provides tax-supported health services to all residents with access to primary and secondary care free-of-charge. A unique central personal registration number is assigned to all Danish residents at birth or immigration, permitting accurate and unambiguous linkage of relevant registries at the individual level.[23] Denmark is administratively divided into five regions. We conducted this study in the Central Denmark Region, with a population of 1.2 million inhabitants.

### Study population

The study population was identified through responses to the survey, “Hvordan har du det?” (How Are You?), a questionnaire-based public health study conducted by DEFACTUM (formerly Centre for Public Health and Quality Improvement).[24] The main incentive of the survey was to map health and health behaviours among citizens in order to promote better health through targeted prevention and intervention by Danish health authorities. Yet, data are available for research also. Between February and May 2010, a random sample of 52,400 people (7,026 in the 16-24 year age group and 45,373 in the  $\geq 25$  year age group) living in the Central Denmark Region was invited to participate in the study. The current study only included adults ( $\geq 25$  years of age) who completed the study’s detailed questionnaire (30,245 persons, 67% of those invited). The questionnaire was sent by post and had to be returned by mail in reply enveloped (postage was prepaid). Up to three reminders were sent if people did not answer. The first 1,000 people answering the questionnaire were promised two tickets for the cinema. In addition, participants were able to win lottery gifts.

## Lifestyle data

Lifestyle-related items included in the questionnaire were body mass index (BMI), participation in regular leisure-time physical activities, diet, smoking status, and alcohol intake. BMI was calculated as self-reported weight in kilograms divided by self-reported height in meters, squared. BMI was categorized according to WHO criteria, as underweight (BMI <18.5), normal weight (BMI 18.5–24), overweight (BMI 25–29), and obese (BMI ≥30).[25] Questionnaire items on physical activity focused on participation in leisure sports or other regular exercise (yes/no). To assess diet, the health survey used a scoring system developed by the Research Centre for Prevention and Health, Capital Region of Denmark. Thirty different questions were included on intake of fruit, vegetables, fish, and fat. The scoring system was used to summarize responses into categories of ‘healthy’ (high amount of fruit, vegetables, fish, and low amounts of saturated fat), ‘reasonably healthy’ (median high intake of fruit, vegetables, fish, and saturated fat), or ‘unhealthy’ (low amount of fruit, vegetables, and fish, and high amount of saturated fat). Smoking status was categorized as never, former, or current (daily or occasional). We categorized alcohol use according to the Danish Health and Medicine Authority's recommendations, that is, high-risk consumption [ $>7/14$  (women/men) drinks weekly] or low-risk consumption ( $\leq 7/14$  drinks weekly).

## Data on medication use

Use of systemic glucocorticoids was identified through the Danish National Health Service Prescription database (DNHSPD). The DNHSPD contains information on prescriptions reimbursed by the National Health System since 2004.[26] Use of systemic glucocorticoids was defined as never use (persons who never redeemed a prescription for a systemic glucocorticoid

1  
2  
3 before completing the questionnaire) and ever use of systemic glucocorticoids. Ever use was  
4 categorized further according to timing of exposure and cumulative dose expressed in dose of  
5 prednisolone equivalents. Timing of exposure was classified as current use (redemption of a  
6 prescription for a systemic glucocorticoid  $\leq 90$  days before completing the questionnaire),  
7 current new use (first-ever redemption of a prescription  $\leq 90$  days before completing the  
8 questionnaire), current continuing use (first-ever prescription redemption more than 90 days  
9 before completing the questionnaire, but most recent prescription  $\leq 90$  days), recent use  
10 (redemption of a prescription for a systemic glucocorticoid 91-365 days before completing the  
11 questionnaire), and former use (redemption of a prescription for a systemic glucocorticoid  $> 365$   
12 days before completing the questionnaire). The cumulative dose expressed in prednisolone  
13 equivalents was divided in  $< 100$  mg, 100 – 499 mg, 500-999 mg, 1,000-1,999 mg, 2000 – 4,999  
14 mg and  $\geq 5,000$  mg. [See Supplementary Table 1 for codes used in the Anatomical Therapeutic  
15 Chemical (ATC) classification system of the World Health Organization and Supplementary  
16 Table 2 for calculation of prednisolone equivalent doses]

### 36 **Statistical analyses**

37 First, prevalence of lifestyle factors was computed according to glucocorticoid use.

38 Second, adjusted prevalence ratios (aPRs) and 95% confidence intervals (CIs) were estimated  
39 using a Poisson regression model. All categories of systemic glucocorticoid use (ever use,  
40 current use, current new use, current continuing use, recent use, and former use as well as  
41 categories of cumulative dose of prednisolone equivalents) were compared to the reference of  
42 never use. The PRs were adjusted for age (10-year age groups). All analyses were stratified by  
43 sex.  
44  
45  
46  
47  
48  
49  
50  
51  
52  
53

1  
2  
3 In supplementary analyses, prevalence ratios were estimated stratified by age group (25-44, 45-  
4 64,  $\geq 65$  years of age) and by potential COPD (yes/ no). Based on history of medication use,  
5  
6 potential COPD was defined as at least two redeemed prescriptions after age 40 (and none  
7  
8 before) for a long-acting beta2 agonist (LABA), a long-acting muscarinic receptor antagonist  
9  
10 (LAMA) or an inhaled corticosteroid (ICS) (or combinations thereof).  
11  
12  
13

14  
15 In estimating prevalence and PRs, post-survey weights computed at Statistic Denmark were used  
16  
17 to account for survey design and non-response.[27]  
18  
19

20  
21 All statistical analyses were conducted using Stata software (Release V.12, StataCorp LP).  
22  
23

### 24 25 **Patient involvement**

26  
27 No patients were involved in setting the research question or the outcome measures, nor were  
28  
29 they involved in developing plans for design or implementation of the study. No patients were  
30  
31 asked to advise on interpretation or writing up of results. There are no plans to disseminate the  
32  
33 results of the research to study participants or the relevant patient community.  
34  
35  
36  
37

### 38 39 **RESULTS**

40  
41  
42 In total, 30,245 persons completed the study questionnaire (53% women), and median age was  
43  
44 53 years. Of these, 563 (1.9%) were current users of glucocorticoids, 885 (2.9%) were recent  
45  
46 users, 3,054 (10%) were former users, and 25,743 (85%) were never users. The prevalence of  
47  
48 demographics and lifestyle factors according to glucocorticoid use is presented in Tables 1a and  
49  
50 1b and in the Supplementary Table 3.  
51  
52  
53  
54  
55  
56  
57  
58  
59  
60

**Table 1a. Prevalence of lifestyle factors according to glucocorticoid use in women. Percentages are weighted**

|                                                                | Ever use    | Current use | Recent use | Former use  | Never use    | Total        |
|----------------------------------------------------------------|-------------|-------------|------------|-------------|--------------|--------------|
|                                                                | N (%)       | N (%)       | N (%)      | N (%)       | N (%)        | N (%)        |
| <b>All</b>                                                     | 2,460 (100) | 301 (100)   | 489 (100)  | 1,670 (100) | 13,485 (100) | 15,945 (100) |
| <b>Median age (range), years</b>                               | 61 (25-98)  | 66 (26-94)  | 58 (25-98) | 58 (25-98)  | 52 (25-101)  | 53 (25-101)  |
| <b>Body Mass Index</b>                                         |             |             |            |             |              |              |
| < 18.5                                                         | 58 (2.7)    | 17 (5.4)    | 15 (3.9)   | 26 (1.8)    | 310 (2.6)    | 368 (2.6)    |
| 18.5-24                                                        | 1,113 (45)  | 126 (38)    | 218 (44)   | 769 (46)    | 7,203 (54)   | 8,316 (52)   |
| 25-29                                                          | 717 (28)    | 89 (31)     | 120 (23)   | 508 (29)    | 3,718 (27)   | 4,435 (27)   |
| ≥30                                                            | 444 (18)    | 50 (17)     | 105 (22)   | 289 (17)    | 1,862 (14)   | 2,306 (14)   |
| Missing                                                        | 128 (6.3)   | 19 (8.2)    | 31 (7.3)   | 78 (5.6)    | 392 (3.3)    | 520 (3.8)    |
| <b>Smoking</b>                                                 |             |             |            |             |              |              |
| Current                                                        | 552 (22)    | 66 (20)     | 112 (22)   | 374 (22)    | 2,744 (21)   | 3,296 (21)   |
| Former                                                         | 765 (30)    | 111 (35)    | 148 (30)   | 506 (29)    | 3,913 (28)   | 4,678 (28)   |
| Never                                                          | 1,047 (44)  | 107 (40)    | 206 (42)   | 734 (45)    | 6,535 (49)   | 7,582 (48)   |
| Missing                                                        | 96 (4.2)    | 17 (4.6)    | 23 (5.3)   | 56 (3.9)    | 293 (2.4)    | 389 (2.7)    |
| <b>Diet</b>                                                    |             |             |            |             |              |              |
| Unhealthy                                                      | 191 (7.9)   | 29 (9.7)    | 36 (7.6)   | 126 (7.7)   | 852 (6.8)    | 1,043 (7.0)  |
| Reasonably healthy                                             | 1,425 (58)  | 181 (62)    | 280 (57)   | 964 (57)    | 8,021 (60)   | 9,446 (59)   |
| Healthy                                                        | 730 (29)    | 72 (22)     | 143 (27)   | 515 (31)    | 4,234 (30)   | 4,964 (30)   |
| Missing                                                        | 114 (5.2)   | 19 (5.5)    | 30 (7.6)   | 65 (4.4)    | 378 (3.2)    | 492 (3.5)    |
| <b>Alcohol intake</b>                                          |             |             |            |             |              |              |
| Low risk consumption                                           | 1,832 (76)  | 231 (80)    | 376 (77)   | 340 (74)    | 10,146 (75)  | 11,978 (75)  |
| High risk consumption                                          | 458 (17)    | 43 (12)     | 75 (13)    | 1,225 (18)  | 2,730 (20)   | 3,188 (19)   |
| Missing                                                        | 170 (7.9)   | 27 (8.1)    | 38 (9.2)   | 105 (7.5)   | 609 (4.7)    | 779 (5.2)    |
| <b>Participation in regular leisure time physical activity</b> |             |             |            |             |              |              |
| No                                                             | 1,179 (49)  | 171 (59)    | 245 (53)   | 763 (46)    | 5,853 (44)   | 7,032 (45)   |
| Yes                                                            | 1,209 (48)  | 121 (39)    | 228 (44)   | 860 (50)    | 7,354 (54)   | 8,563 (53)   |
| Missing                                                        | 72 (3.2)    | 9 (2.3)     | 16 (3.2)   | 47 (3.3)    | 278 (2.3)    | 350 (2.4)    |



Never use: Persons who never redeemed a prescription for a systemic glucocorticoid before completing the questionnaire. Ever use: At least one redemption of a prescription for a systemic glucocorticoid before completing the questionnaire. Current use: Redemption of a prescription for a systemic glucocorticoid  $\leq 90$  days before completing the questionnaire. Recent use: Redemption of a prescription for a systemic glucocorticoid 91-365 days before completing the questionnaire. Former use: Redemption of a prescription for a systemic glucocorticoid  $> 365$  days before completing the questionnaire.

**Table 1b. Prevalence of lifestyle factors according to glucocorticoid use in men. Percentages are weighted**

|                                  | Ever use    | Current use | Recent use | Former use  | Never use    | Total        |
|----------------------------------|-------------|-------------|------------|-------------|--------------|--------------|
|                                  | N (%)       | N (%)       | N (%)      | N (%)       | N (%)        | N (%)        |
| <b>All</b>                       | 2,042 (100) | 262 (100)   | 396 (100)  | 1,384 (100) | 12,258 (100) | 14,300 (100) |
| <b>Median age (range), years</b> | 61 (25-98)  | 65 (28-94)  | 57 (25-88) | 59 (25-100) | 53 (25-99)   | 54 (25-100)  |
| <b>Body Mass Index</b>           |             |             |            |             |              |              |
| < 18.5                           | 21 (1.3)    | 6 (4.0)     | 6 (1.8)    | 9 (5.3)     | 40 (0.04)    | 61 (0.6)     |
| 18.5-24                          | 644 (33)    | 88 (34)     | 128 (34)   | 428 (32)    | 4,572 (39)   | 5,216 (38)   |
| 25-29                            | 959 (46)    | 116 (41)    | 188 (46)   | 655 (47)    | 5,566 (44)   | 6,525 (44)   |
| $\geq 30$                        | 365 (17)    | 47 (19)     | 65 (14)    | 253 (18)    | 1,864 (15)   | 2,229 (15)   |
| Missing                          | 53 (2.8)    | 5 (2.2)     | 9 (3.5)    | 39 (2.6)    | 216 (1.7)    | 269 (1.9)    |
| <b>Smoking</b>                   |             |             |            |             |              |              |
| Current                          | 518 (27)    | 64 (27)     | 98 (26)    | 356 (27)    | 3,072 (27)   | 3,590 (27)   |
| Former                           | 843 (38)    | 126 (43)    | 157 (36)   | 560 (38)    | 4,022 (30)   | 4,865 (31)   |
| Never                            | 630 (32)    | 67 (27)     | 132 (35)   | 431 (32)    | 4,968 (42)   | 5,598 (41)   |
| Missing                          | 51 (2.8)    | 5 (2.2)     | 9 (3.2)    | 37 (2.8)    | 196 (1.6)    | 247 (1.8)    |
| <b>Diet</b>                      |             |             |            |             |              |              |
| Unhealthy                        | 310 (15)    | 47 (15)     | 63 (15)    | 200 (15)    | 1,906 (16)   | 2,216 (16)   |
| Reasonably healthy               | 1,301 (64)  | 159 (62)    | 253 (65)   | 889 (64)    | 7,874 (64)   | 9,175 (64)   |
| Healthy                          | 342 (15)    | 38 (13)     | 68 (16)    | 236 (15)    | 2,069 (17)   | 2,411 (16)   |
| Missing                          | 89 (5.1)    | 18 (9.3)    | 12 (3.2)   | 59 (4.9)    | 409 (3.4)    | 498 (3.6)    |
| <b>Alcohol intake</b>            |             |             |            |             |              |              |
| Low risk consumption             | 1,489 (72)  | 184 (70)    | 293 (73)   | 1,012 (72)  | 9,231 (75)   | 10,720 (75)  |
| High risk consumption            | 443 (22)    | 62 (21)     | 81 (19)    | 300 (22)    | 2,588 (21)   | 3,031 (21)   |
| Missing                          | 110 (6.7)   | 16 (8.7)    | 22 (7.6)   | 72 (6.0)    | 439 (3.5)    | 549 (4.0)    |

**Participation in  
regular leisure time  
physical activity**

|         |            |          |          |          |            |            |
|---------|------------|----------|----------|----------|------------|------------|
| No      | 1,128 (54) | 82 (65)  | 214 (52) | 739 (52) | 6,265 (50) | 7,393 (51) |
| Yes     | 874 (44)   | 175 (32) | 171 (45) | 621 (46) | 5,791 (48) | 6,665 (48) |
| Missing | 40 (2.2)   | 5 (2.6)  | 11 (2.7) | 24 (2.0) | 202 (1.6)  | 242 (1.7)  |

Never use: Persons who never redeemed a prescription for a systemic glucocorticoid before completing the questionnaire. Ever use: At least one redemption of a prescription for a systemic glucocorticoid before completing the questionnaire. Current use: Redemption of a prescription for a systemic glucocorticoid  $\leq 90$  days before completing the questionnaire. Recent use: Redemption of a prescription for a systemic glucocorticoid 91-365 days before completing the questionnaire. Former use: Redemption of a prescription for a systemic glucocorticoid  $> 365$  days before completing the questionnaire.

**Body Mass Index**

In women, ever users of glucocorticoids were slightly more obese than never users [18% versus 14%; aPR 1.4 (95% CI 1.2 to 1.5)] (Table 1a and Figure 1) with highest prevalence in current continuing users (21%) and recent users (22%) (Table 1a, Supplementary Table 3 and Supplementary Table 4). Also, male ever users were slightly more obese than never users [17% versus 15%; aPR 1.2 (95% CI 1.1 to 1.4)] (Table 1b and Figure 2). In addition, prevalence of obesity increased with greater cumulative glucocorticoid dose in both sexes (Figure 3 and Figure 4)

**Smoking**

Glucocorticoid ever users had a similar prevalence of smoking as never users of glucocorticoids in both women [aPR 1.1 (95% CI 1.0 to 1.1)] and men [aPR 1.1 (95% CI 1.1 to 1.1)] (Figure 1 and Figure 2). These findings were consistent across all categories of glucocorticoid users (Figure 1, Figure 2, Figure 3 and Figure 4) and when stratifying on potential COPD (Supplementary Table 5)

**Alcohol Intake**

1  
2  
3 In women, the prevalence of high-risk alcohol consumption was somewhat lower in ever users of  
4 glucocorticoids than never users [17% vs. 20%; aPR = 0.8 (95% CI 0.7 to 1.0)] (Table 1a and  
5  
6  
7 Figure 1). For men there was no difference [aPR 1.0 (95% CI 0.9 to 1.1)] (Table 1b and Figure  
8  
9  
10 2).

### 11 12 **Physical activity**

13  
14 Physical activity did not differ substantially according to use of glucocorticoids in either women  
15  
16 [aPR 1.1 (95% CI 1.0 to 1.1)] or men [aPR 1.0 (95% CI 1.0 to 1.0)] (Figure 1 and Figure 2).

17  
18 Although, greater cumulative dose of glucocorticoid use was slightly associated with less  
19  
20 physical activity (Figure 3 and Figure 4)

21  
22 The PRs did not differ substantially by age group (Supplementary Table 6 and Supplementary  
23  
24 Table 7)

## 25 26 27 28 29 30 31 **DISCUSSION**

32  
33 This population-based study found that users of systemic glucocorticoids had a slightly higher  
34  
35 prevalence of obesity than never users. In women, the prevalence of obesity was 1.4-fold higher  
36  
37 and in men 1.2-fold higher. In women, the prevalence of high-risk alcohol consumption was 0.8-  
38  
39 fold lower in users of glucocorticoids than never users. This finding did not apply for men.

40  
41 Smoking habits, diet and physical activity did not differ substantially according to use of  
42  
43 systemic glucocorticoids.

44  
45 Data on lifestyle among glucocorticoid users is sparse, although truncal obesity is a well-known  
46  
47 feature of glucocorticoid excess.[3, 28] In addition, one study reported higher prevalence of  
48  
49 glucocorticoid use in obese vs. non-obese people [29] and one study found that overweight and  
50  
51 obesity were risk factors of self-reported arthritis.[19] In contrast, the prevalence of overweight  
52  
53  
54  
55  
56  
57  
58  
59  
60

1  
2  
3 and obesity was lower in people with inflammatory bowel disease than healthy controls.[20]

4  
5 While arthritis and inflammatory bowel disease are potential indications for glucocorticoid  
6  
7 treatment, these populations do not compare directly to our study population. Due to the cross-  
8  
9 sectional design of our study, we were not able to investigate if glucocorticoid use predicted  
10  
11 obesity or vice versa and the study did not aim to investigate adverse effects of glucocorticoids.  
12  
13 Nevertheless, we found higher prevalence of obesity in current continuing users of  
14  
15 glucocorticoids compared to current new users and increasing prevalence of obesity with  
16  
17 increasing cumulative glucocorticoid dose. These results may indicate that glucocorticoid use  
18  
19 precedes obesity. Physical activity has been reported to be low in some patient groups ordinarily  
20  
21 treated with glucocorticoids; one study found that more than 60% of adults with arthritis do not  
22  
23 comply with physical activity recommendations.[21] The reasons why the majority of persons  
24  
25 with arthritis did not meet physical activity recommendations were not investigated, but authors  
26  
27 discussed if it may be related to arthritis-specific barriers to physical activity such as fear of  
28  
29 making their arthritis worse, fatigue or pain.[21] In our study, we found no major difference in  
30  
31 physical activity according to glucocorticoid use, although greater cumulative dose of  
32  
33 glucocorticoid was slightly associated with less physical activity.  
34  
35  
36  
37  
38  
39  
40  
41

42 While we conducted a large population-based cohort study with detailed information on lifestyle  
43  
44 factors, its limitations must be considered. First, the response rate to the questionnaire was 67%.  
45  
46 We cannot be sure if persons who completed the health survey had a different health profile than  
47  
48 those who declined. To minimize such bias, we used a weighting method developed by Statistic  
49  
50 Denmark for this particular survey.[27] Second, persons who completed the questionnaire might  
51  
52 have answered incorrectly. Third, redeemed prescriptions may be an imperfect measure of actual  
53  
54  
55  
56  
57  
58  
59

1  
2  
3 drug intake and its timing. Also, the prescription database only covers prescriptions from 2004  
4 on, which may have led to misclassification of glucocorticoid use. We were not able to predict  
5 direction of bias due to potential misclassification of glucocorticoid use or lifestyle factors.  
6  
7  
8 Fourth, we did not stratify on socio economic status and were not able to identify treatment  
9  
10 indication. The algorithm used to define people as having potential COPD may be imperfect. In  
11 particular, certain persons identified as having COPD actually have asthma. To address this  
12 issue, redeemed prescriptions for LABA or LAMA before age 40 were an exclusion criterion, as  
13 asthma onset most often occurs in childhood or adolescence, whereas COPD onset is later in life.  
14 Last, as this study had a cross-sectional design, it was unable to evaluate whether lifestyle  
15 predicts glucocorticoid use or vice versa. Still, the study did not aim or was designed to evaluate  
16 adverse effects of glucocorticoids.  
17  
18  
19

20  
21 Our study has important implications for quantifying the amount of potential uncontrolled  
22 confounding by lifestyle factors in observational studies of systemic glucocorticoids. Results  
23 from this study may guide assessment of the association between lifestyle and glucocorticoid use  
24 and can for example be used in a bias analysis when data on lifestyle factors is not available.[6,  
25 7, 30] Yet, it must be acknowledged that any assessment should not be based solely on  
26 associations found in this study. Directed acyclic graphs (DAGs) could be applied to ensure that  
27 recorded lifestyle factors are not mediators or colliders.[31]  
28  
29  
30  
31  
32  
33  
34  
35  
36  
37  
38  
39  
40  
41  
42  
43  
44  
45

46 In conclusion, glucocorticoid users had a slightly higher prevalence of obesity and female  
47 glucocorticoid users had a slightly lower prevalence of high-risk alcohol consumption compared  
48 to never users. Smoking habits, diet and physical activity did not differ substantially according to  
49 use of glucocorticoids. Our study provides a framework for quantifying potential uncontrolled  
50 confounding by lifestyle factors in studies of systemic glucocorticoids.  
51  
52  
53  
54  
55  
56  
57  
58  
59  
60

## FOOTNOTES

**Funding:** This work was supported by Department of Clinical Epidemiology. Department of Clinical Epidemiology, Aarhus University Hospital, receives funding for other studies from companies in the form of research grants to (and administered by) Aarhus University. None of these studies have any relation to the present study.

**Competing interests:** The authors report no conflicts of interest and have no financial disclosures.

**Author statement:** KL, IP, FBL, LP, JOLJ, and HTS made primary contributions to the concept of the study and wrote the manuscript. KL performed statistical analyses. KL, IP, FBL, LP, JOLJ, and HTS contributed to the interpretation of results and revised the manuscript critically. All authors approved the final manuscript.

**Ethics Approval:** This study was approved by the Danish Data Protection Agency (Record number: 2016-051-000001, serial number 448). For this type of study, approval from Ethics committee and formal consent is not required.

**Data sharing statement:** Data are available as presented in the paper and in the supplementary files. According to Danish legislation, our own approvals to use the Danish data sources for the current study do not allow us to distribute or make patient data directly available to other parties. Interested researchers may contact Julie Christiansen (juechi@rm.dk) for access to the questionnaire “Hvordan har du det?” (How Are You?). (For updated information please visit: <http://www.defactum.dk/om-DEFACTUM/projektsite/hvordan-har-du-det/ansogning-om-adgang-til-data/>). For access to prescription data from the Danish National Health Service Prescription Database please contact Helle Schleicher Kjær (hsk@clin.au.dk) (For updated information please visit: <http://kea.au.dk/research/registries-and-biobanks/the-danish-national-health-service-prescription-database/>).

## REFERENCES

- 1 Laugesen K, Jorgensen JOL, Sorensen HT, et al. Systemic glucocorticoid use in Denmark: a population-based prevalence study. *BMJ open* 2017;7:e015237-2016-.
- 2 Laugesen K, Jorgensen JOL, Petersen I, et al. Fifteen-year nationwide trends in systemic glucocorticoid drug use in Denmark. *Eur J Endocrinol* 2019.
- 3 Pivonello R, De Martino MC, Iacuanello D, et al. Metabolic Alterations and Cardiovascular Outcomes of Cortisol Excess. *Frontiers of hormone research* 2016;46:54-65.
- 4 Davis JM, 3rd, Maradit Kremers H, Crowson CS, et al. Glucocorticoids and cardiovascular events in rheumatoid arthritis: a population-based cohort study. *Arthritis and Rheumatism* 2007;56:820-30.
- 5 Fardet L, Petersen I, Nazareth I. Risk of cardiovascular events in people prescribed glucocorticoids with iatrogenic Cushing's syndrome: cohort study. *BMJ (Clinical research ed)* 2012;345:e4928.
- 6 Johannesdottir SA, Horvath-Puho E, Dekkers OM, et al. Use of glucocorticoids and risk of venous thromboembolism: a nationwide population-based case-control study. *JAMA internal medicine* 2013;173:743-52.
- 7 Wei L, MacDonald TM, Walker BR. Taking glucocorticoids by prescription is associated with subsequent cardiovascular disease. *Annals of Internal Medicine* 2004;141:764-70.
- 8 Clore JN, Thurby-Hay L. Glucocorticoid-induced hyperglycemia. *Endocrine practice : official journal of the American College of Endocrinology and the American Association of Clinical Endocrinologists* 2009;15:469-74.
- 9 Fardet L, Petersen I, Nazareth I. Suicidal behavior and severe neuropsychiatric disorders following glucocorticoid therapy in primary care. *The American Journal of Psychiatry* 2012;169:491-7.
- 10 van Staa TP, Leufkens HG, Cooper C. The epidemiology of corticosteroid-induced osteoporosis: a meta-analysis. *Osteoporosis international : a journal established as result of cooperation between the European Foundation for Osteoporosis and the National Osteoporosis Foundation of the USA* 2002;13:777-87.
- 11 Anderson JJ, Rondano P, Holmes A. Roles of diet and physical activity in the prevention of osteoporosis. *Scandinavian journal of rheumatology Supplement* 1996;103:65-74.
- 12 Hubert HB, Feinleib M, McNamara PM, et al. Obesity as an independent risk factor for cardiovascular disease: a 26-year follow-up of participants in the Framingham Heart Study. *Circulation* 1983;67:968-77.
- 13 Benjamin EJ, Levy D, Vaziri SM, et al. Independent risk factors for atrial fibrillation in a population-based cohort. The Framingham Heart Study. *Jama* 1994;271:840-4.
- 14 Hu FB, Manson JE, Stampfer MJ, et al. Diet, lifestyle, and the risk of type 2 diabetes mellitus in women. *The New England journal of medicine* 2001;345:790-7.
- 15 Barnes PJ. Chronic obstructive pulmonary disease. *The New England journal of medicine* 2000;343:269-80.
- 16 Lunney PC, Kariyawasam VC, Wang RR, et al. Smoking prevalence and its influence on disease course and surgery in Crohn's disease and ulcerative colitis. *Alimentary Pharmacology & Therapeutics* 2015;42:61-70.
- 17 Radner H, Lesperance T, Accortt NA, et al. Incidence and Prevalence of Cardiovascular Risk Factors Among Patients With Rheumatoid Arthritis, Psoriasis, or Psoriatic Arthritis. *Arthritis care & research* 2016.



- 1  
2  
3 18 Sugiyama D, Nishimura K, Tamaki K, et al. Impact of smoking as a risk factor for developing  
4 rheumatoid arthritis: a meta-analysis of observational studies. *Annals of the Rheumatic Diseases*  
5 2010;69:70-81.  
6 19 Mehrotra C, Naimi TS, Serdula M, et al. Arthritis, body mass index, and professional advice to lose  
7 weight: implications for clinical medicine and public health. *American Journal of Preventive Medicine*  
8 2004;27:16-21.  
9 20 Nic Suibhne T, Raftery TC, McMahon O, et al. High prevalence of overweight and obesity in adults  
11 with Crohn's disease: associations with disease and lifestyle factors. *Journal of Crohn's & colitis*  
12 2013;7:e241-8.  
13 21 Fontaine KR, Heo M, Bathon J. Are US adults with arthritis meeting public health recommendations  
14 for physical activity? *Arthritis and Rheumatism* 2004;50:624-8.  
15 22 Christiansen CF, Christensen S, Mehnert F, et al. Glucocorticoid use and risk of atrial fibrillation or  
16 flutter: a population-based, case-control study. *Archives of Internal Medicine* 2009;169:1677-83.  
17 23 Schmidt M, Pedersen L, Sorensen HT. The Danish Civil Registration System as a tool in epidemiology.  
18 *European journal of epidemiology* 2014;29:541-9.  
19 24 Larsen FB, Ankersen PV, Poulsen S. Hvordan har du det? 2010 – Sundhedsprofil for region og  
20 kommuner [How Are you? 2010– Health profile for region and municipalities]. Report, Region  
21 Midtjylland, Denmark. 2011.  
22 25 2017.  
23 26 Johannesdottir SA, Horvath-Puho E, Ehrenstein V, et al. Existing data sources for clinical  
24 epidemiology: The Danish National Database of Reimbursed Prescriptions. *Clinical epidemiology*  
25 2012;4:303-13.  
26 27 Fangel S, Linde PC, Thorsted BL. Nye problemer med repræsentativitet i surveys, som opregning med  
27 registre kan reducere. Metode & Data. *Nye problemer med repræsentativitet i surveys, som opregning*  
28 *med registre kan reducere Metode & Data* 2007:14.  
29 28 Barahona MJ, Sucunza N, Resmini E, et al. Persistent body fat mass and inflammatory marker  
30 increases after long-term cure of Cushing's syndrome. *The Journal of clinical endocrinology and*  
31 *metabolism* 2009;94:3365-71.  
32 29 Savas M, Wester VL, Staufenbiel SM, et al. Systematic Evaluation of Corticosteroid Use in Obese and  
33 Non-obese Individuals: A Multi-cohort Study. *International journal of medical sciences* 2017;14:615-21.  
34 30 Rothman KJ, Greenland S, Lash TL. Modern Epidemiology, Third Edition. *Modern Epidemiology, third*  
35 *edition*. Philadelphia: Lippincott Williams & Wilkens 2008:345-52.  
36 31 Shrier I, Platt RW. Reducing bias through directed acyclic graphs. *BMC medical research methodology*  
37 2008;8:70.  
38  
39  
40  
41  
42  
43  
44  
45  
46  
47  
48  
49  
50  
51  
52  
53  
54  
55  
56  
57  
58  
59  
60



## FIGURE LEGENDS

### **Figure 1. Age-adjusted prevalence ratios (aPRs) and 95% confidence intervals (CIs) for lifestyle factors comparing glucocorticoid users to never users in women.**

Footnote: Never use: Persons who never redeemed a prescription for a systemic glucocorticoid before completing the questionnaire. Ever use At least one redemption of a prescription for a systemic glucocorticoid before completing the questionnaire. Current use: Redemption of a prescription for a systemic glucocorticoid  $\leq 90$  days before completing the questionnaire. Recent use: Redemption of a prescription for a systemic glucocorticoid 91-365 days before completing the questionnaire. Former use: Redemption of a prescription for a systemic glucocorticoid  $> 365$  days before completing the questionnaire.

### **Figure 2. Age-adjusted prevalence ratios (aPRs) and 95% confidence intervals (CIs) for lifestyle factors comparing glucocorticoid users to never users in men.**

Footnote: Never use: Persons who never redeemed a prescription for a systemic glucocorticoid before completing the questionnaire. Ever use At least one redemption of a prescription for a systemic glucocorticoid before completing the questionnaire. Current use: Redemption of a prescription for a systemic glucocorticoid  $\leq 90$  days before completing the questionnaire. Recent use: Redemption of a prescription for a systemic glucocorticoid 91-365 days before completing the questionnaire. Former use: Redemption of a prescription for a systemic glucocorticoid  $> 365$  days before completing the questionnaire.

### **Figure 3. Age-adjusted prevalence ratios (aPRs) and 95% confidence intervals (CIs) for lifestyle factors comparing cumulative glucocorticoid dose (in grams of prednisolone equivalents) to never users in women.**

### **Figure 4. Age-adjusted prevalence ratios (aPRs) and 95% confidence intervals (CIs) for lifestyle factors comparing cumulative glucocorticoid dose (in grams of prednisolone equivalents) to never users in men.**

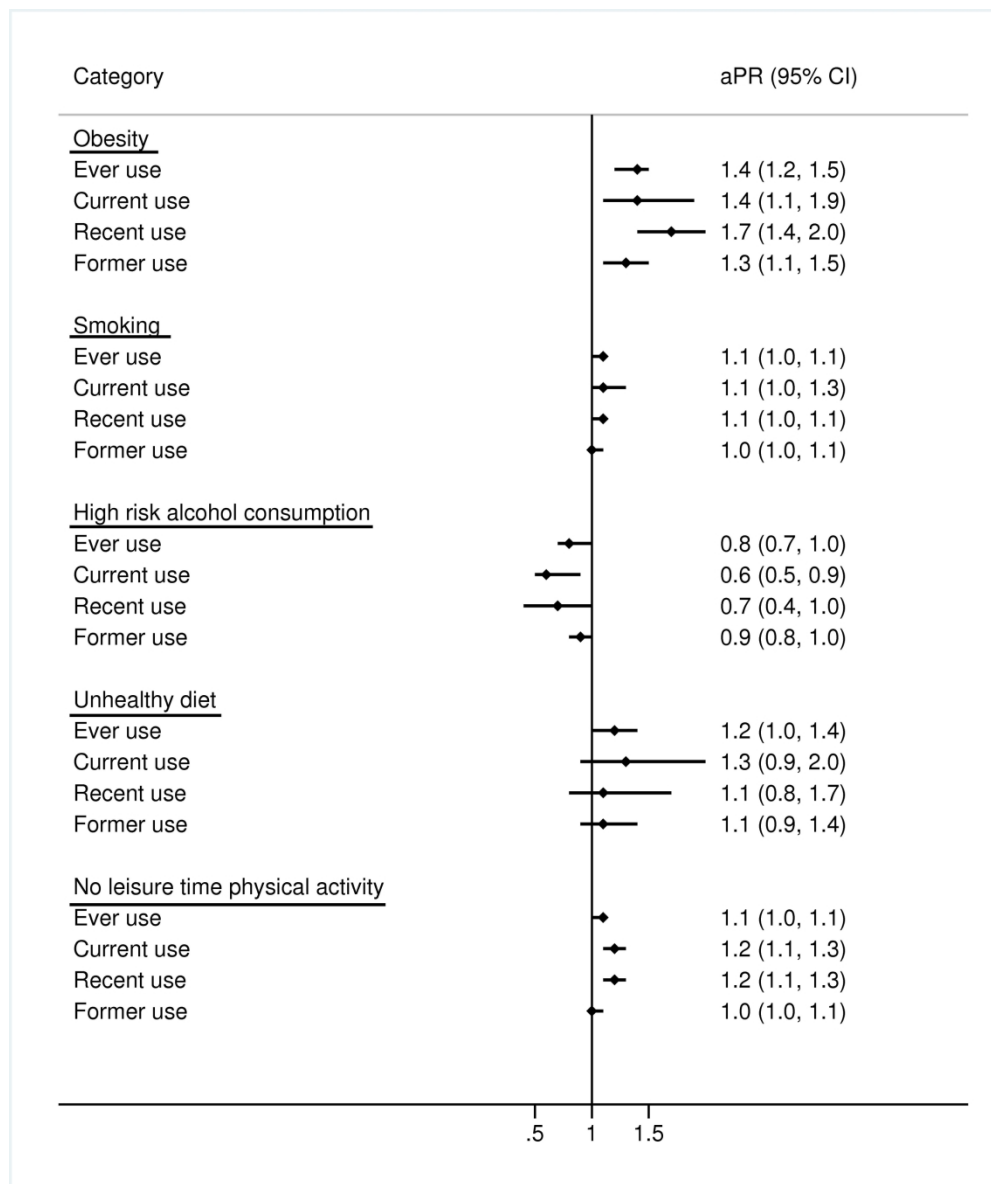

Age-adjusted prevalence ratios (aPRs) and 95% confidence intervals (CIs) for lifestyle factors comparing glucocorticoid users to never users in women.

209x248mm (300 x 300 DPI)

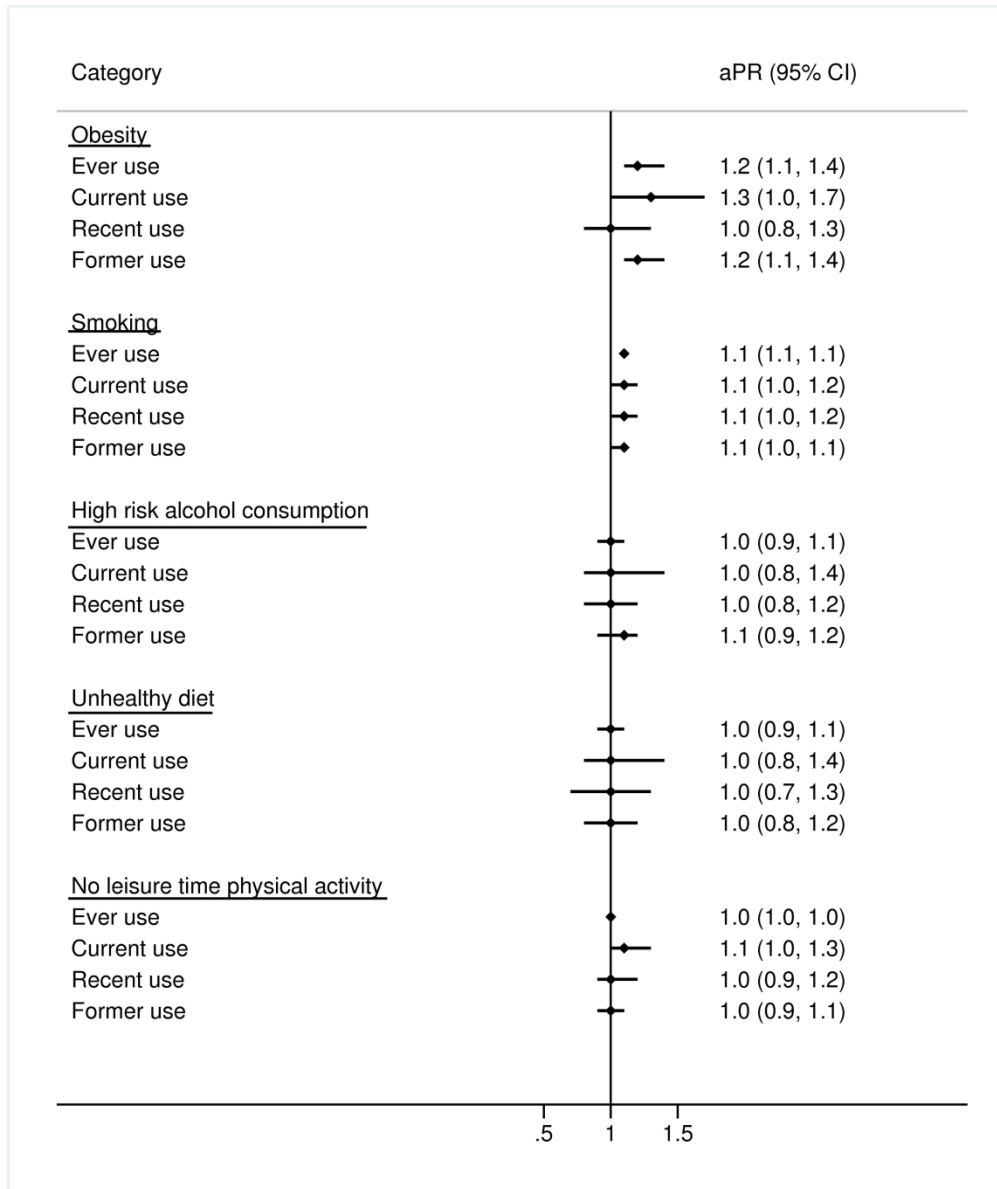

Age-adjusted prevalence ratios (aPRs) and 95% confidence intervals (CIs) for lifestyle factors comparing glucocorticoid users to never users in men.

257x305mm (300 x 300 DPI)

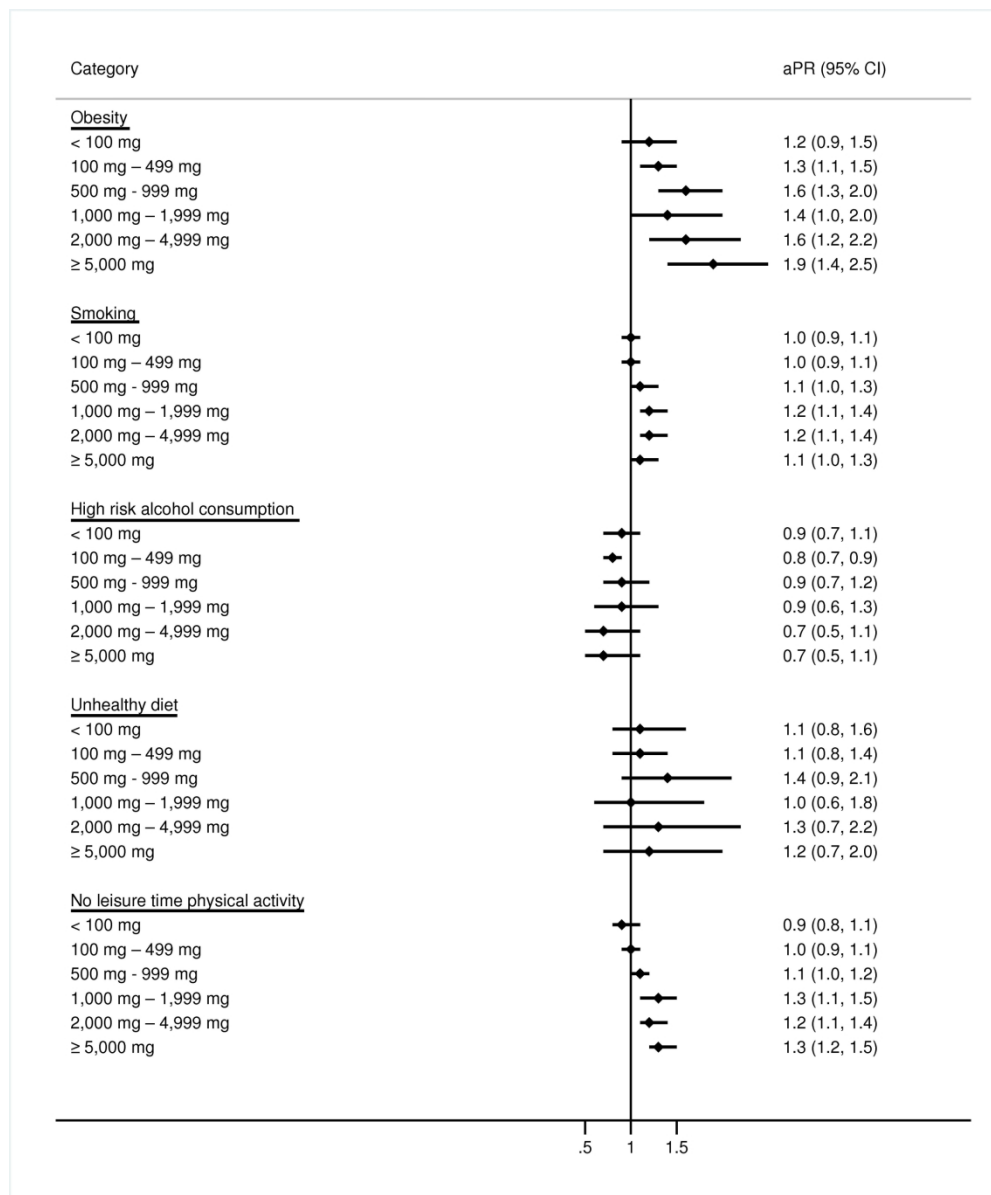

Age-adjusted prevalence ratios (aPRs) and 95% confidence intervals (CIs) for lifestyle factors comparing cumulative glucocorticoid dose (in grams of prednisolone equivalents) to never users in women.

208x249mm (300 x 300 DPI)

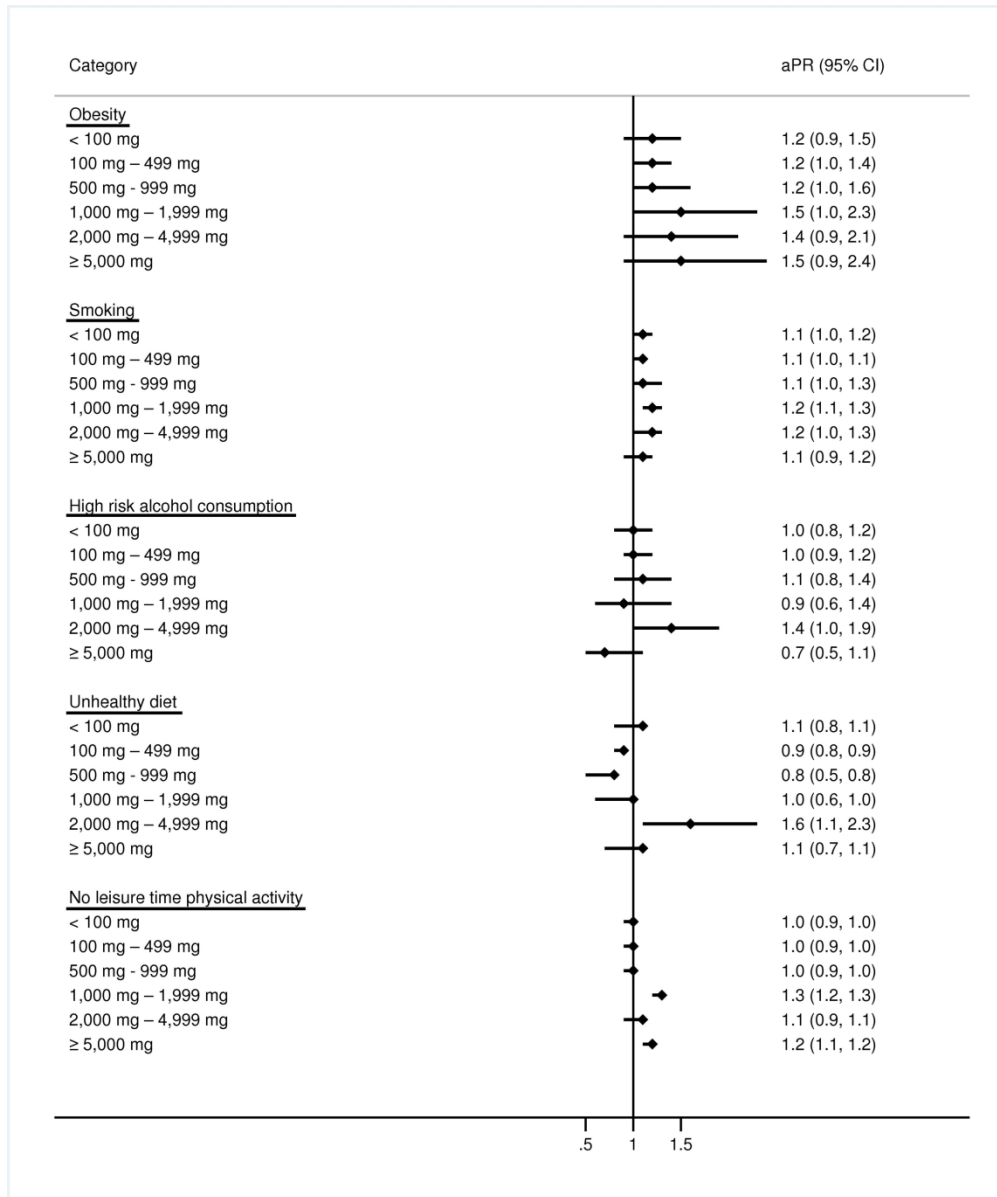

Age-adjusted prevalence ratios (aPRs) and 95% confidence intervals (CIs) for lifestyle factors comparing cumulative glucocorticoid dose (in grams of prednisolone equivalents) to never users in men.

208x249mm (300 x 300 DPI)

1  
2  
3 **SUPPLEMENTARY**  
4

5 **Supplementary Table 1. Anatomical Therapeutic Classification (ATC) codes**

6

| 7 <b>Medication</b>               | <b>ATC codes</b> |
|-----------------------------------|------------------|
| 8 <b>Systemic glucocorticoids</b> | H02AB            |
| 9                                 |                  |
| 10 Betamethasone                  | H02AB01          |
| 11 Dexamethasone                  | H02AB02          |
| 12 Methylprednisolone             | H02AB04          |
| 13 Prednisolone                   | H02AB06          |
| 14 Prednisone                     | H02AB07          |
| 15 Triamcinolone                  | H02AB08          |
| 16 Hydrocortisone                 | H02AB09          |
| 17                                |                  |
| 18                                |                  |
| 19 <b>Inhaled medications</b>     |                  |
| 20                                |                  |
| 21 Salmeterol                     | R03AC12          |
| 22 Formeterol                     | R03AC13          |
| 23 Indacaterol                    | R03AC18          |
| 24 Olodaterol                     | R03AC19          |
| 25 Tiotropium                     | R03BB04          |
| 26 Acclidinium                    | R03BB05          |
| 27 Glycopyrronium                 | R03BB06          |
| 28 Umeclidinium                   | R03BB07          |
| 29 Salmeterol and fluticasone     | R03AK06          |
| 30 Formeterol and budesonide      | R03AK07          |
| 31 Formeterol and beclomethasone  | R03AK08          |
| 32 Vilanterol and fluticasone     | R03AK10          |
| 33 Formeterol and fluticasone     | R03AK11          |
| 34 Beclomethasone                 | R03BA01          |
| 35 Budesonide                     | R03BA02          |
| 36 Flunisolide                    | R03BA03          |
| 37 Fluticasone                    | R03BA05          |
| 38 Mometasone                     | R03BA07          |
| 39 Ciclisonide                    | R03BA08          |
| 40 Vilanterol and umeclidinium    | R03AL03          |
| 41 Indaceterol and glycopyrronium | R03AL04          |
| 42 Formeterol and acclidinium     | R03AL05          |
| 43 Olodaterol and tiotropium      | R03AL06          |
| 44 Beclomethasone                 | R03BA01          |
| 45 Budesonide                     | R03BA02          |
| 46 Flunisolide                    | R03BA03          |
| 47 Fluticasone                    | R03BA05          |
| 48 Mometasone                     | R03BA07          |
| 49 Ciclosonide                    | R03BA08          |
| 50                                |                  |
| 51                                |                  |
| 52                                |                  |
| 53                                |                  |
| 54                                |                  |

55  
56  
57  
58  
59  
60

**Supplementary Table 2. Equivalency table presenting systemic glucocorticoids and corresponding prednisolone conversion factors.**

|                    | <b>Equivalent glucocorticoid dose</b> | <b>Prednisolone conversion factor</b> |
|--------------------|---------------------------------------|---------------------------------------|
| Cortisone          | 25                                    | 0.2                                   |
| Cortisol           | 20                                    | 0.25                                  |
| Methylprednisolone | 4                                     | 1.25                                  |
| Prednisolone       | 5                                     | 1                                     |
| Prednisone         | 5                                     | 1                                     |
| Triamcinolone      | 4                                     | 1.25                                  |
| Dexamethasone      | 0.75                                  | 6.67                                  |
| Betamethasone      | 0.6                                   | 8.33                                  |

*Cumulative dose calculation:*

The cumulative dose was calculated by multiplying the number of pills/injections, dose per pill/injection, and prednisolone conversion factor for each prescription and then adding them up across all prescriptions.

**Supplementary Table 3. Prevalence of lifestyle factors according to current new use and current continuing use of glucocorticoid in women and men. Percentages are weighted**

|                                                                | Women           |                        | Men             |                        |
|----------------------------------------------------------------|-----------------|------------------------|-----------------|------------------------|
|                                                                | Current new use | Current continuing use | Current new use | Current continuing use |
|                                                                | N (%)           | N (%)                  | N (%)           | N (%)                  |
| <b>All</b>                                                     | 78 (100)        | 223 (100)              | 77 (100)        | 185 (100)              |
| <b>Median age (range), years</b>                               | 59 (26-88)      | 67 (28-94)             | 59 (28-92)      | 68 (32-94)             |
| <b>Body Mass Index</b>                                         |                 |                        |                 |                        |
| < 18.5                                                         | <5 (-)          | 14 (6.3)               | <5 (-)          | 5 (4.8)                |
| 18.5-24                                                        | 42 (51)         | 84 (34)                | 23 (25)         | 65 (37)                |
| 25-29                                                          | 21 (30)         | 68 (31)                | 35 (50)         | 81 (38)                |
| ≥30                                                            | 8 (8.2)         | 42 (21)                | 17 (20)         | 30 (18)                |
| Missing                                                        | <5 (-)          | 15 (8.1)               | <5 (-)          | <5 (-)                 |
| <b>Smoking</b>                                                 |                 |                        |                 |                        |
| Current                                                        | 20 (25)         | 46 (18)                | 22 (32)         | 42 (25)                |
| Former                                                         | 26 (31)         | 85 (37)                | 39 (47)         | 87 (42)                |
| Never                                                          | 30 (43)         | 77 (39)                | 15 (20)         | 52 (30)                |
| Missing                                                        | <5 (-)          | 15 (5.8)               | <5 (-)          | <5 (2.5)               |
| <b>Diet</b>                                                    |                 |                        |                 |                        |
| Unhealthy                                                      | < 5 (-)         | 25 (11)                | 16 (18)         | 31 (14)                |
| Reasonably healthy                                             | 49 (63)         | 132 (62)               | 51 (71)         | 108 (58)               |
| Healthy                                                        | 22 (28)         | 50 (20)                | 8 (7.4)         | 30 (16)                |
| Missing                                                        | < 5 (-)         | 16 (5.9)               | <5 (-)          | 16 (12)                |
| <b>Alcohol intake</b>                                          |                 |                        |                 |                        |
| Low risk consumption                                           | 65 (86)         | 166 (77)               | 55 (71)         | 129 (70)               |
| High risk consumption                                          | 12 (13)         | 31 (12)                | 18 (19)         | 44 (22)                |
| Missing                                                        | <5 (-)          | 26 (11)                | <5 (-)          | 12 (8.0)               |
| <b>Participation in regular leisure time physical activity</b> |                 |                        |                 |                        |
| No                                                             | 38 (46)         | 133 (63)               | 50 (65)         | 125 (65)               |
| Yes                                                            | 39 (53)         | 82 (34)                | 26 (33)         | 56 (32)                |
| Missing                                                        | <5 (-)          | <5 (-)                 | <5 (-)          | <5 (-)                 |

Current new use: First-ever redemption of a prescription  $\leq$  90 days before completing the questionnaire. Current continuing use: First-ever prescription redemption more than 90 days before completing the questionnaire, but most recent prescription  $\leq$  90 days.



**Supplementary Table 4. Age-adjusted prevalence ratios (aPRs) and 95% confidence intervals (CIs) for lifestyle factors comparing glucocorticoid users to never users, stratified by sex.**

|                                                                   | aPR (95% CI)     |                  |
|-------------------------------------------------------------------|------------------|------------------|
| Category                                                          | Women            | Men              |
| <b>Obesity</b>                                                    |                  |                  |
| Current new use                                                   | 0.7 (0.3 to 1.4) | 1.4 (0.9 to 2.3) |
| Current continuing use                                            | 1.7 (1.2 to 1.6) | 1.4 (1.0 to 1.3) |
| <b>Ever smoking</b>                                               |                  |                  |
| Current new use                                                   | 1.1 (0.9 to 1.4) | 1.3 (1.1 to 1.4) |
| Current continuing use                                            | 1.1 (1.0 to 1.1) | 1.0 (1.0 to 1.1) |
| <b>High risk alcohol consumption</b>                              |                  |                  |
| Current new use                                                   | 0.6 (0.9 to 1.0) | 0.9 (0.8 to 1.4) |
| Current continuing use                                            | 0.6 (0.3 to 1.0) | 1.1 (0.9 to 1.2) |
| <b>Unhealthy diet</b>                                             |                  |                  |
| Current new use                                                   | 0.6 (0.2 to 1.9) | 1.1 (0.7 to 1.9) |
| Current continuing use                                            | 1.5 (0.9 to 2.4) | 1.0 (0.9 to 1.1) |
| <b>No participation in regular leisure time physical activity</b> |                  |                  |
| Current new use                                                   | 0.9 (0.7 to 1.3) | 1.2 (1.0 to 1.4) |
| Current continuing use                                            | 1.3 (1.0 to 1.1) | 1.1 (1.0 to 1.3) |

Current new use: First-ever redemption of a prescription  $\leq$  90 days before completing the questionnaire. Current continuing use: First-ever prescription redemption more than 90 days before completing the questionnaire, but most recent prescription  $\leq$  90 days.

**Supplementary Table 5. Age- and sex- adjusted prevalence ratios (aPRs) and 95% confidence intervals (CIs) for lifestyle factors comparing glucocorticoid users to never users, stratified by potential chronic obstructive pulmonary disease (COPD).**

| Characteristics                          | aPR (95% CI)   |               |
|------------------------------------------|----------------|---------------|
|                                          | Potential COPD | No COPD       |
| <b>Obesity</b>                           |                |               |
| Ever                                     | 1.1 (0.9-1.3)  | 1.3 (1.2-1.4) |
| Current                                  | 1.0 (0.7-1.5)  | 1.2 (1.0-1.6) |
| Recent                                   | 1.0 (0.7-1.4)  | 1.3 (1.1-1.6) |
| Former                                   | 1.0 (0.8-1.4)  | 1.2 (1.1-1.4) |
| <b>Smoking</b>                           |                |               |
| Ever                                     | 1.1 (1.0-1.1)  | 1.0 (1.0-1.1) |
| Current                                  | 1.1 (0.9-1.2)  | 1.1 (1.0-1.2) |
| Recent                                   | 1.1 (1.0-1.3)  | 1.1 (1.0-1.1) |
| Former                                   | 1.0 (1.0-1.1)  | 1.0 (1.0-1.1) |
| <b>High risk alcohol consumption</b>     |                |               |
| Ever                                     | 0.9 (0.7-1.1)  | 0.9 (0.9-1.0) |
| Current                                  | 1.0 (0.7-1.5)  | 0.8 (0.6-1.0) |
| Recent                                   | 0.6 (0.4-1.0)  | 0.9 (0.7-1.0) |
| Former                                   | 0.9 (0.7-1.2)  | 1.0 (0.9-1.1) |
| <b>Unhealthy diet</b>                    |                |               |
| Ever                                     | 1.1 (0.8-1.6)  | 1.0 (0.9-1.1) |
| Current                                  | 1.6 (1.0-2.5)  | 0.9 (0.6-1.2) |
| Recent                                   | 1.3 (0.8-2.0)  | 1.0 (0.7-1.2) |
| Former                                   | 0.8 (0.6-1.3)  | 1.0 (0.9-1.2) |
| <b>No leisure time physical activity</b> |                |               |
| Ever                                     | 1.1 (1.0-1.2)  | 1.0 (1.0-1.1) |
| Current                                  | 1.2 (1.1-1.4)  | 1.1 (1.0-1.2) |
| Recent                                   | 1.2 (1.0-1.3)  | 1.1 (1.0-1.2) |
| Former                                   | 1.1 (1.0-1.2)  | 1.0 (0.9-1.0) |

Potential COPD was defined as at least two prescriptions for a long-acting beta2 agonist (LABA), a long-acting muscarinic receptor antagonist (LAMA), or an inhaled corticosteroid (ICS) (or combination thereof) after age 40, and no prescriptions for these agents redeemed at or before age 40.

**Supplementary Table 6. Prevalence ratios (PRs) and 95% confidence intervals (CIs) for lifestyle factors comparing glucocorticoid users to never users in women, stratified by age group.**

| Category                                 | PR (95% CI)        |                       |                  |                  |
|------------------------------------------|--------------------|-----------------------|------------------|------------------|
|                                          | 25-44 years of age | 45 to 64 years of age | ≥65 years of age | All              |
| <b>Obesity</b>                           |                    |                       |                  |                  |
| Ever                                     | 1.40 (1.13-1.72)   | 1.41 (1.21-1.65)      | 1.33 (1.07-1.65) | 1.37 (1.23-1.52) |
| Current                                  | 1.37 (0.41-2.78)   | 1.56 (1.01-2.39)      | 1.32 (0.87-2.03) | 1.33 (1.00-1.77) |
| Recent                                   | 1.86 (1.32-2.63)   | 1.95 (1.49-2.54)      | 1.72 (0.65-1.91) | 1.66 (1.36-2.02) |
| Former                                   | 1.28 (0.99-1.65)   | 1.24 (1.03-1.49)      | 1.42 (1.10-1.84) | 1.29 (1.13-1.47) |
| <b>Smoking</b>                           |                    |                       |                  |                  |
| Ever                                     | 0.98 (0.87-1.10)   | 1.10 (1.03-1.17)      | 1.06 (0.96-1.16) | 1.09 (1.04-1.14) |
| Current                                  | 1.34 (0.97-1.86)   | 1.19 (1.02-1.40)      | 1.14 (0.86-1.26) | 1.16 (1.03-1.31) |
| Recent                                   | 0.89 (0.84-1.12)   | 1.08 (0.95-1.22)      | 1.26 (1.07-1.47) | 1.11 (1.01-1.23) |
| Former                                   | 0.97 (0.85-1.12)   | 1.09 (1.02-1.17)      | 1.00 (0.89-1.12) | 1.07 (1.01-1.13) |
| <b>High risk alcohol consumption</b>     |                    |                       |                  |                  |
| Ever                                     | 0.74 (0.56-0.98)   | 0.90 (0.80-1.03)      | 0.71 (0.57-0.89) | 0.86 (0.78-0.96) |
| Current                                  | 0.47 (0.10-2.20)   | 0.76 (0.48-1.22)      | 0.53 (0.31-0.90) | 0.65 (0.46-0.92) |
| Recent                                   | 0.78 (0.45-1.37)   | 0.69 (0.51-0.94)      | 0.58 (0.33-1.02) | 0.71 (0.56-0.91) |
| Former                                   | 0.75 (0.54-1.04)   | 0.98 (0.85-1.13)      | 0.82 (0.64-1.06) | 0.95 (0.84-1.07) |
| <b>Unhealthy diet</b>                    |                    |                       |                  |                  |
| Ever                                     | 1.18 (0.86-1.63)   | 1.10 (0.79-1.44)      | 1.28 (0.95-1.72) | 1.18 (0.99-1.41) |
| Current                                  | 0.61 (0.19-1.97)   | 1.55 (0.77-3.12)      | 1.48 (0.85-2.55) | 1.45 (0.96-2.20) |
| Recent                                   | 1.11 (0.55-2.26)   | 1.21 (0.65-2.24)      | 1.22 (0.65-2.28) | 1.17 (0.81-1.70) |
| Former                                   | 1.26 (0.88-1.80)   | 0.96 (0.67-1.38)      | 1.23 (0.86-1.76) | 1.14 (0.92-1.40) |
| <b>No leisure time physical activity</b> |                    |                       |                  |                  |
| Ever                                     | 0.98 (0.87-1.11)   | 1.13 (1.04-1.21)      | 1.11 (1.03-1.21) | 1.12 (1.07-1.18) |
| Current                                  | 1.43 (1.05-1.96)   | 1.32 (1.09-1.58)      | 1.16 (1.00-1.36) | 1.33 (1.19-1.49) |
| Recent                                   | 1.12 (0.81-1.29)   | 1.18 (1.01-1.19)      | 1.28 (1.11-1.47) | 1.20 (1.09-1.33) |
| Former                                   | 0.93 (0.81-1.08)   | 1.09 (0.99-1.19)      | 1.05 (0.95-1.17) | 1.06 (1.00-1.13) |

Never use: Persons who never redeemed a prescription for a systemic glucocorticoid before completing the questionnaire. Ever use: At least one redemption of a prescription for a systemic glucocorticoid before completing the questionnaire. Current use: Redemption of a prescription for a systemic glucocorticoid ≤ 90 days before completing the questionnaire. Recent use: Redemption of a prescription for a systemic glucocorticoid 91-365 days before completing the questionnaire. Former use: Redemption of a prescription for a systemic glucocorticoid > 365 days before completing the questionnaire.

**Supplementary Table 7. Prevalence ratios (PRs) and 95% confidence intervals (CIs) for lifestyle factors comparing glucocorticoid users to never users in men, stratified by age group.**

| Category                                 | PR (95% CI)        |                       |                  |                  |
|------------------------------------------|--------------------|-----------------------|------------------|------------------|
|                                          | 25-44 years of age | 45 to 64 years of age | ≥65 years of age | All              |
| <b>Obesity</b>                           |                    |                       |                  |                  |
| Ever                                     | 1.13 (0.80-1.33)   | 1.30 (1.11-1.52)      | 1.22 (0.96-1.54) | 1.19 (1.05-1.34) |
| Current                                  | 1.12 (0.41-2.54)   | 1.29 (0.84-1.98)      | 1.46 (0.94-2.27) | 1.27 (0.95-1.71) |
| Recent                                   | 0.83 (0.50-1.38)   | 1.23 (0.85-1.79)      | 0.91 (0.51-1.62) | 0.99 (0.75-1.29) |
| Former                                   | 1.12 (0.83-1.51)   | 1.32 (1.10-1.59)      | 1.22 (0.92-1.62) | 1.23 (1.07-1.42) |
| <b>Smoking</b>                           |                    |                       |                  |                  |
| Ever                                     | 1.12 (1.00-1.25)   | 1.11 (1.06-1.18)      | 1.08 (1.02-1.14) | 1.17 (1.12-1.22) |
| Current                                  | 1.47 (1.12-1.91)   | 1.15 (0.99-1.33)      | 1.02 (0.90-1.15) | 1.26 (1.16-1.38) |
| Recent                                   | 1.16 (0.95-1.41)   | 1.05 (0.93-1.19)      | 1.11 (0.99-1.24) | 1.12 (1.02-1.22) |
| Former                                   | 1.05 (0.92-1.21)   | 1.13 (1.06-1.20)      | 1.09 (1.03-1.16) | 1.17 (1.11-1.22) |
| <b>High risk alcohol consumption</b>     |                    |                       |                  |                  |
| Ever                                     | 1.16 (0.92-1.47)   | 0.95 (0.82-1.10)      | 1.04 (0.86-1.26) | 1.06 (0.96-1.18) |
| Current                                  | 1.16 (0.54-2.51)   | 1.19 (0.84-1.69)      | 0.79 (0.51-1.22) | 1.06 (0.82-1.38) |
| Recent                                   | 1.16 (0.76-1.77)   | 0.67 (0.46-0.97)      | 1.22 (0.85-1.77) | 0.97 (0.77-1.22) |
| Former                                   | 1.17 (0.88-1.55)   | 0.98 (0.83-1.16)      | 1.08 (0.86-1.36) | 1.10 (0.96-1.24) |
| <b>Unhealthy diet</b>                    |                    |                       |                  |                  |
| Ever                                     | 1.00 (0.79-1.27)   | 1.02 (0.83-1.24)      | 0.93 (0.72-1.19) | 0.97 (0.85-1.11) |
| Current                                  | 1.22 (1.07-1.69)   | 1.04 (0.61-1.77)      | 1.41 (0.94-2.11) | 1.01 (0.73-1.38) |
| Recent                                   | 1.25 (0.85-1.84)   | 0.69 (0.41-1.19)      | 0.73 (0.43-1.24) | 0.96 (0.72-1.27) |
| Former                                   | 0.98 (0.74-1.31)   | 1.09 (0.88-1.37)      | 0.82 (0.59-1.15) | 0.97 (0.83-1.13) |
| <b>No leisure time physical activity</b> |                    |                       |                  |                  |
| Ever                                     | 1.02 (0.90-1.16)   | 1.03 (0.96-1.10)      | 1.06 (0.98-1.14) | 1.09 (1.03-1.14) |
| Current                                  | 1.17 (0.79-1.73)   | 1.21 (1.04-1.42)      | 1.18 (1.04-1.34) | 1.31 (1.19-1.45) |
| Recent                                   | 1.10 (0.87-1.37)   | 0.97 (0.82-1.15)      | 1.07 (0.91-1.25) | 1.05 (0.94-1.18) |
| Former                                   | 0.96 (0.82-1.13)   | 1.01 (0.93-1.10)      | 1.01 (0.92-1.11) | 1.05 (0.98-1.12) |

Never use: Persons who never redeemed a prescription for a systemic glucocorticoid before completing the questionnaire. Ever use: At least one redemption of a prescription for a systemic glucocorticoid before completing the questionnaire. Current use: Redemption of a prescription for a systemic glucocorticoid ≤ 90 days before completing the questionnaire. Recent use: Redemption of a prescription for a systemic glucocorticoid 91-365 days before completing the questionnaire. Former use: Redemption of a prescription for a systemic glucocorticoid > 365 days before completing the questionnaire.

1  
2  
3  
4  
5  
6  
7  
8  
9  
10  
11  
12  
13  
14  
15  
16  
17  
18  
19  
20  
21  
22  
23  
24  
25  
26  
27  
28  
29  
30  
31  
32  
33  
34  
35  
36  
37  
38  
39  
40  
41  
42  
43  
44  
45  
46  
47  
48  
49  
50  
51  
52  
53  
54  
55  
56  
57  
58  
59  
60

For peer review only

**STROBE 2007 (v4) checklist of items to be included in reports of observational studies in epidemiology\***  
**Checklist for cohort, case-control, and cross-sectional studies (combined)**

| Section/Topic             | Item # | Recommendation                                                                                                                                                                                                                                                                                                                                                                                                                                                         | Reported on page # |
|---------------------------|--------|------------------------------------------------------------------------------------------------------------------------------------------------------------------------------------------------------------------------------------------------------------------------------------------------------------------------------------------------------------------------------------------------------------------------------------------------------------------------|--------------------|
| Title and abstract        | 1      | (a) Indicate the study’s design with a commonly used term in the title or the abstract                                                                                                                                                                                                                                                                                                                                                                                 | 1,2                |
|                           |        | (b) Provide in the abstract an informative and balanced summary of what was done and what was found                                                                                                                                                                                                                                                                                                                                                                    | 2,3                |
| <b>Introduction</b>       |        |                                                                                                                                                                                                                                                                                                                                                                                                                                                                        |                    |
| Background/rationale      | 2      | Explain the scientific background and rationale for the investigation being reported                                                                                                                                                                                                                                                                                                                                                                                   | 4                  |
| Objectives                | 3      | State specific objectives, including any pre-specified hypotheses                                                                                                                                                                                                                                                                                                                                                                                                      | 4                  |
| <b>Methods</b>            |        |                                                                                                                                                                                                                                                                                                                                                                                                                                                                        |                    |
| Study design              | 4      | Present key elements of study design early in the paper                                                                                                                                                                                                                                                                                                                                                                                                                | 4, 5               |
| Setting                   | 5      | Describe the setting, locations, and relevant dates, including periods of recruitment, exposure, follow-up, and data collection                                                                                                                                                                                                                                                                                                                                        | 5,6,7              |
| Participants              | 6      | (a) <i>Cohort study</i> —Give the eligibility criteria, and the sources and methods of selection of participants. Describe methods of follow-up<br><i>Case-control study</i> —Give the eligibility criteria, and the sources and methods of case ascertainment and control selection. Give the rationale for the choice of cases and controls<br><i>Cross-sectional study</i> —Give the eligibility criteria, and the sources and methods of selection of participants | 5                  |
|                           |        | (b) <i>Cohort study</i> —For matched studies, give matching criteria and number of exposed and unexposed<br><i>Case-control study</i> —For matched studies, give matching criteria and the number of controls per case                                                                                                                                                                                                                                                 | Not relevant       |
| Variables                 | 7      | Clearly define all outcomes, exposures, predictors, potential confounders, and effect modifiers. Give diagnostic criteria, if applicable                                                                                                                                                                                                                                                                                                                               | 5,6,7              |
| Data sources/ measurement | 8*     | For each variable of interest, give sources of data and details of methods of assessment (measurement). Describe comparability of assessment methods if there is more than one group                                                                                                                                                                                                                                                                                   | 5,6,7              |
| Bias                      | 9      | Describe any efforts to address potential sources of bias                                                                                                                                                                                                                                                                                                                                                                                                              | 7,8                |
| Study size                | 10     | Explain how the study size was arrived at                                                                                                                                                                                                                                                                                                                                                                                                                              | 5                  |
| Quantitative variables    | 11     | Explain how quantitative variables were handled in the analyses. If applicable, describe which groupings were chosen and why                                                                                                                                                                                                                                                                                                                                           | 5,6,7,8            |
| Statistical methods       | 12     | (a) Describe all statistical methods, including those used to control for confounding                                                                                                                                                                                                                                                                                                                                                                                  | 7,8                |
|                           |        | (b) Describe any methods used to examine subgroups and interactions                                                                                                                                                                                                                                                                                                                                                                                                    | 7,8                |
|                           |        | (c) Explain how missing data were addressed                                                                                                                                                                                                                                                                                                                                                                                                                            | 8,9,10             |
|                           |        | (d) <i>Cohort study</i> —If applicable, explain how loss to follow-up was addressed<br><i>Case-control study</i> —If applicable, explain how matching of cases and controls was addressed                                                                                                                                                                                                                                                                              | Not applicable     |

|                          |     |                                                                                                                                                                                                              |                |
|--------------------------|-----|--------------------------------------------------------------------------------------------------------------------------------------------------------------------------------------------------------------|----------------|
|                          |     | <i>Cross-sectional study</i> —If applicable, describe analytical methods taking account of sampling strategy                                                                                                 |                |
|                          |     | (e) Describe any sensitivity analyses                                                                                                                                                                        | Not applicable |
| <b>Results</b>           |     |                                                                                                                                                                                                              |                |
| Participants             | 13* | (a) Report numbers of individuals at each stage of study—eg numbers potentially eligible, examined for eligibility, confirmed eligible, included in the study, completing follow-up, and analysed            | 5              |
|                          |     | (b) Give reasons for non-participation at each stage                                                                                                                                                         | Not applicable |
|                          |     | (c) Consider use of a flow diagram                                                                                                                                                                           | Not applicable |
| Descriptive data         | 14* | (a) Give characteristics of study participants (eg demographic, clinical, social) and information on exposures and potential confounders                                                                     | 8,9,10,11      |
|                          |     | (b) Indicate number of participants with missing data for each variable of interest                                                                                                                          | 8,9,10,11      |
|                          |     | (c) <i>Cohort study</i> —Summarise follow-up time (eg, average and total amount)                                                                                                                             | Not applicable |
| Outcome data             | 15* | <i>Cohort study</i> —Report numbers of outcome events or summary measures over time                                                                                                                          | Not applicable |
|                          |     | <i>Case-control study</i> —Report numbers in each exposure category, or summary measures of exposure                                                                                                         | Not applicable |
|                          |     | <i>Cross-sectional study</i> —Report numbers of outcome events or summary measures                                                                                                                           | 8,9,10         |
| Main results             | 16  | (a) Give unadjusted estimates and, if applicable, confounder-adjusted estimates and their precision (eg, 95% confidence interval). Make clear which confounders were adjusted for and why they were included | 10,11          |
|                          |     | (b) Report category boundaries when continuous variables were categorized                                                                                                                                    | 8,9,10         |
|                          |     | (c) If relevant, consider translating estimates of relative risk into absolute risk for a meaningful time period                                                                                             | Not applicable |
| Other analyses           | 17  | Report other analyses done—eg analyses of subgroups and interactions, and sensitivity analyses                                                                                                               | Supplementary  |
| <b>Discussion</b>        |     |                                                                                                                                                                                                              |                |
| Key results              | 18  | Summarise key results with reference to study objectives                                                                                                                                                     | 12             |
| Limitations              | 19  | Discuss limitations of the study, taking into account sources of potential bias or imprecision. Discuss both direction and magnitude of any potential bias                                                   | 13,14          |
| Interpretation           | 20  | Give a cautious overall interpretation of results considering objectives, limitations, multiplicity of analyses, results from similar studies, and other relevant evidence                                   | 14             |
| Generalisability         | 21  | Discuss the generalisability (external validity) of the study results                                                                                                                                        | 14             |
| <b>Other information</b> |     |                                                                                                                                                                                                              |                |
| Funding                  | 22  | Give the source of funding and the role of the funders for the present study and, if applicable, for the original study on which the present article is based                                                | 15             |

\*Give information separately for cases and controls in case-control studies and, if applicable, for exposed and unexposed groups in cohort and cross-sectional studies.

**Note:** An Explanation and Elaboration article discusses each checklist item and gives methodological background and published examples of transparent reporting. The STROBE checklist is best used in conjunction with this article (freely available on the Web sites of PLoS Medicine at <http://www.plosmedicine.org/>, Annals of Internal Medicine at <http://www.annals.org/>, and Epidemiology at <http://www.epidem.com/>). Information on the STROBE Initiative is available at [www.strobe-statement.org](http://www.strobe-statement.org).
