# Supplementary material for: Prevalence of lifestyle characteristics in glucocorticoid users and non-users: a Danish population-based cross-sectional study
Source: PubMed Central journal article supplement — BMJ Open. 2019 Oct 28;9(10):e030780. doi: 10.1136/bmjopen-2019-030780 (PMC6830647; doi:10.1136/bmjopen-2019-030780), 2019-10-28
Supplement: bmjopen-2019-030780supp001.pdf [file bmjopen-2019-030780supp001.pdf]

## SUPPLEMENTARY

Supplementary Table 1. Anatomical Therapeutic Classification (ATC) codes

| Medication                      | ATC codes |
|---------------------------------|-----------|
| <b>Systemic glucocorticoids</b> | H02AB     |
| Betamethasone                   | H02AB01   |
| Dexamethasone                   | H02AB02   |
| Methylprednisolone              | H02AB04   |
| Prednisolone                    | H02AB06   |
| Prednisone                      | H02AB07   |
| Triamcinolone                   | H02AB08   |
| Hydrocortisone                  | H02AB09   |
| <b>Inhaled medications</b>      |           |
| Salmeterol                      | R03AC12   |
| Formeterol                      | R03AC13   |
| Indacaterol                     | R03AC18   |
| Olodaterol                      | R03AC19   |
| Tiotropium                      | R03BB04   |
| Aclidinium                      | R03BB05   |
| Glycopyrronium                  | R03BB06   |
| Umeclidinium                    | R03BB07   |
| Salmeterol and fluticasone      | R03AK06   |
| Formeterol and budesonide       | R03AK07   |
| Formeterol and beclomethasone   | R03AK08   |
| Vilanterol and fluticasone      | R03AK10   |
| Formeterol and fluticasone      | R03AK11   |
| Beclomethasone                  | R03BA01   |
| Budesonide                      | R03BA02   |
| Flunisolide                     | R03BA03   |
| Fluticasone                     | R03BA05   |
| Mometasone                      | R03BA07   |
| Ciclesonide                     | R03BA08   |
| Vilanterol and umeclidinium     | R03AL03   |
| Indacaterol and glycopyrronium  | R03AL04   |
| Formeterol and aclidinium       | R03AL05   |
| Olodaterol and tiotropium       | R03AL06   |
| Beclomethasone                  | R03BA01   |
| Budesonide                      | R03BA02   |
| Flunisolide                     | R03BA03   |
| Fluticasone                     | R03BA05   |
| Mometasone                      | R03BA07   |
| Ciclesonide                     | R03BA08   |

**Supplementary Table 2. Equivalency table presenting systemic glucocorticoids and corresponding prednisolone conversion factors.**

|                    | <b>Equivalent glucocorticoid dose</b> | <b>Prednisolone conversion factor</b> |
|--------------------|---------------------------------------|---------------------------------------|
| Cortisone          | 25                                    | 0.2                                   |
| Cortisol           | 20                                    | 0.25                                  |
| Methylprednisolone | 4                                     | 1.25                                  |
| Prednisolone       | 5                                     | 1                                     |
| Prednisone         | 5                                     | 1                                     |
| Triamcinolone      | 4                                     | 1.25                                  |
| Dexamethasone      | 0.75                                  | 6.67                                  |
| Betamethasone      | 0.6                                   | 8.33                                  |

*Cumulative dose calculation:*

The cumulative dose was calculated by multiplying the number of pills/injections, dose per pill/injection, and prednisolone conversion factor for each prescription and then adding them up across all prescriptions.

**Supplementary Table 3. Prevalence of lifestyle factors according to current new use and current continuing use of glucocorticoid in women and men. Percentages are weighted**

|                                                                            | Women                    |                                    | Men                      |                                    |
|----------------------------------------------------------------------------|--------------------------|------------------------------------|--------------------------|------------------------------------|
|                                                                            | Current new use<br>N (%) | Current continuing<br>use<br>N (%) | Current new use<br>N (%) | Current continuing<br>use<br>N (%) |
| <b>All</b>                                                                 | 78 (100)                 | 223 (100)                          | 77 (100)                 | 185 (100)                          |
| <b>Median age<br/>(range), years</b>                                       | 59 (26-88)               | 67 (28-94)                         | 59 (28-92)               | 68 (32-94)                         |
| <b>Body Mass Index</b>                                                     |                          |                                    |                          |                                    |
| < 18.5                                                                     | <5 (-)                   | 14 (6.3)                           | <5 (-)                   | 5 (4.8)                            |
| 18.5-24                                                                    | 42 (51)                  | 84 (34)                            | 23 (25)                  | 65 (37)                            |
| 25-29                                                                      | 21 (30)                  | 68 (31)                            | 35 (50)                  | 81 (38)                            |
| ≥30                                                                        | 8 (8.2)                  | 42 (21)                            | 17 (20)                  | 30 (18)                            |
| Missing                                                                    | <5 (-)                   | 15 (8.1)                           | <5 (-)                   | <5 (-)                             |
| <b>Smoking</b>                                                             |                          |                                    |                          |                                    |
| Current                                                                    | 20 (25)                  | 46 (18)                            | 22 (32)                  | 42 (25)                            |
| Former                                                                     | 26 (31)                  | 85 (37)                            | 39 (47)                  | 87 (42)                            |
| Never                                                                      | 30 (43)                  | 77 (39)                            | 15 (20)                  | 52 (30)                            |
| Missing                                                                    | <5 (-)                   | 15 (5.8)                           | <5 (-)                   | <5 (2.5)                           |
| <b>Diet</b>                                                                |                          |                                    |                          |                                    |
| Unhealthy                                                                  | < 5 (-)                  | 25 (11)                            | 16 (18)                  | 31 (14)                            |
| Reasonably<br>healthy                                                      | 49 (63)                  | 132 (62)                           | 51 (71)                  | 108 (58)                           |
| Healthy                                                                    | 22 (28)                  | 50 (20)                            | 8 (7.4)                  | 30 (16)                            |
| Missing                                                                    | < 5 (-)                  | 16 (5.9)                           | <5 (-)                   | 16 (12)                            |
| <b>Alcohol intake</b>                                                      |                          |                                    |                          |                                    |
| Low risk<br>consumption                                                    | 65 (86)                  | 166 (77)                           | 55 (71)                  | 129 (70)                           |
| High risk<br>consumption                                                   | 12 (13)                  | 31 (12)                            | 18 (19)                  | 44 (22)                            |
| Missing                                                                    | <5 (-)                   | 26 (11)                            | <5 (-)                   | 12 (8.0)                           |
| <b>Participation in<br/>regular leisure<br/>time physical<br/>activity</b> |                          |                                    |                          |                                    |
| No                                                                         | 38 (46)                  | 133 (63)                           | 50 (65)                  | 125 (65)                           |
| Yes                                                                        | 39 (53)                  | 82 (34)                            | 26 (33)                  | 56 (32)                            |
| Missing                                                                    | <5 (-)                   | <5 (-)                             | <5 (-)                   | <5 (-)                             |

Current new use: First-ever redemption of a prescription ≤ 90 days before completing the questionnaire. Current continuing use: First-ever prescription redemption more than 90 days before completing the questionnaire, but most recent prescription ≤ 90 days.

**Supplementary Table 4. Age-adjusted prevalence ratios (aPRs) and 95% confidence intervals (CIs) for lifestyle factors comparing glucocorticoid users to never users, stratified by sex.**

| Category                                                          | aPR (95% CI)     |                  |
|-------------------------------------------------------------------|------------------|------------------|
|                                                                   | Women            | Men              |
| <b>Obesity</b>                                                    |                  |                  |
| Current new use                                                   | 0.7 (0.3 to 1.4) | 1.4 (0.9 to 2.3) |
| Current continuing use                                            | 1.7 (1.2 to 1.6) | 1.4 (1.0 to 1.3) |
| <b>Ever smoking</b>                                               |                  |                  |
| Current new use                                                   | 1.1 (0.9 to 1.4) | 1.3 (1.1 to 1.4) |
| Current continuing use                                            | 1.1 (1.0 to 1.1) | 1.0 (1.0 to 1.1) |
| <b>High risk alcohol consumption</b>                              |                  |                  |
| Current new use                                                   | 0.6 (0.9 to 1.0) | 0.9 (0.8 to 1.4) |
| Current continuing use                                            | 0.6 (0.3 to 1.0) | 1.1 (0.9 to 1.2) |
| <b>Unhealthy diet</b>                                             |                  |                  |
| Current new use                                                   | 0.6 (0.2 to 1.9) | 1.1 (0.7 to 1.9) |
| Current continuing use                                            | 1.5 (0.9 to 2.4) | 1.0 (0.9 to 1.1) |
| <b>No participation in regular leisure time physical activity</b> |                  |                  |
| Current new use                                                   | 0.9 (0.7 to 1.3) | 1.2 (1.0 to 1.4) |
| Current continuing use                                            | 1.3 (1.0 to 1.1) | 1.1 (1.0 to 1.3) |

Current new use: First-ever redemption of a prescription  $\leq$  90 days before completing the questionnaire. Current continuing use: First-ever prescription redemption more than 90 days before completing the questionnaire, but most recent prescription  $\leq$  90 days.

**Supplementary Table 5. Age- and sex- adjusted prevalence ratios (aPRs) and 95% confidence intervals (CIs) for lifestyle factors comparing glucocorticoid users to never users, stratified by potential chronic obstructive pulmonary disease (COPD).**

| Characteristics                          | aPR (95% CI)   |               |
|------------------------------------------|----------------|---------------|
|                                          | Potential COPD | No COPD       |
| <b>Obesity</b>                           |                |               |
| Ever                                     | 1.1 (0.9-1.3)  | 1.3 (1.2-1.4) |
| Current                                  | 1.0 (0.7-1.5)  | 1.2 (1.0-1.6) |
| Recent                                   | 1.0 (0.7-1.4)  | 1.3 (1.1-1.6) |
| Former                                   | 1.0 (0.8-1.4)  | 1.2 (1.1-1.4) |
| <b>Smoking</b>                           |                |               |
| Ever                                     | 1.1 (1.0-1.1)  | 1.0 (1.0-1.1) |
| Current                                  | 1.1 (0.9-1.2)  | 1.1 (1.0-1.2) |
| Recent                                   | 1.1 (1.0-1.3)  | 1.1 (1.0-1.1) |
| Former                                   | 1.0 (1.0-1.1)  | 1.0 (1.0-1.1) |
| <b>High risk alcohol consumption</b>     |                |               |
| Ever                                     | 0.9 (0.7-1.1)  | 0.9 (0.9-1.0) |
| Current                                  | 1.0 (0.7-1.5)  | 0.8 (0.6-1.0) |
| Recent                                   | 0.6 (0.4-1.0)  | 0.9 (0.7-1.0) |
| Former                                   | 0.9 (0.7-1.2)  | 1.0 (0.9-1.1) |
| <b>Unhealthy diet</b>                    |                |               |
| Ever                                     | 1.1 (0.8-1.6)  | 1.0 (0.9-1.1) |
| Current                                  | 1.6 (1.0-2.5)  | 0.9 (0.6-1.2) |
| Recent                                   | 1.3 (0.8-2.0)  | 1.0 (0.7-1.2) |
| Former                                   | 0.8 (0.6-1.3)  | 1.0 (0.9-1.2) |
| <b>No leisure time physical activity</b> |                |               |
| Ever                                     | 1.1 (1.0-1.2)  | 1.0 (1.0-1.1) |
| Current                                  | 1.2 (1.1-1.4)  | 1.1 (1.0-1.2) |
| Recent                                   | 1.2 (1.0-1.3)  | 1.1 (1.0-1.2) |
| Former                                   | 1.1 (1.0-1.2)  | 1.0 (0.9-1.0) |

Potential COPD was defined as at least two prescriptions for a long-acting beta2 agonist (LABA), a long-acting muscarinic receptor antagonist (LAMA), or an inhaled corticosteroid (ICS) (or combination thereof) after age 40, and no prescriptions for these agents redeemed at or before age 40.

**Supplementary Table 6. Prevalence ratios (PRs) and 95% confidence intervals (CIs) for lifestyle factors comparing glucocorticoid users to never users in women, stratified by age group.**

| Category                                 | PR (95% CI)        |                       |                  |                  |
|------------------------------------------|--------------------|-----------------------|------------------|------------------|
|                                          | 25-44 years of age | 45 to 64 years of age | ≥65 years of age | All              |
| <b>Obesity</b>                           |                    |                       |                  |                  |
| Ever                                     | 1.40 (1.13-1.72)   | 1.41 (1.21-1.65)      | 1.33 (1.07-1.65) | 1.37 (1.23-1.52) |
| Current                                  | 1.37 (0.41-2.78)   | 1.56 (1.01-2.39)      | 1.32 (0.87-2.03) | 1.33 (1.00-1.77) |
| Recent                                   | 1.86 (1.32-2.63)   | 1.95 (1.49-2.54)      | 1.72 (0.65-1.91) | 1.66 (1.36-2.02) |
| Former                                   | 1.28 (0.99-1.65)   | 1.24 (1.03-1.49)      | 1.42 (1.10-1.84) | 1.29 (1.13-1.47) |
| <b>Smoking</b>                           |                    |                       |                  |                  |
| Ever                                     | 0.98 (0.87-1.10)   | 1.10 (1.03-1.17)      | 1.06 (0.96-1.16) | 1.09 (1.04-1.14) |
| Current                                  | 1.34 (0.97-1.86)   | 1.19 (1.02-1.40)      | 1.14 (0.86-1.26) | 1.16 (1.03-1.31) |
| Recent                                   | 0.89 (0.84-1.12)   | 1.08 (0.95-1.22)      | 1.26 (1.07-1.47) | 1.11 (1.01-1.23) |
| Former                                   | 0.97 (0.85-1.12)   | 1.09 (1.02-1.17)      | 1.00 (0.89-1.12) | 1.07 (1.01-1.13) |
| <b>High risk alcohol consumption</b>     |                    |                       |                  |                  |
| Ever                                     | 0.74 (0.56-0.98)   | 0.90 (0.80-1.03)      | 0.71 (0.57-0.89) | 0.86 (0.78-0.96) |
| Current                                  | 0.47 (0.10-2.20)   | 0.76 (0.48-1.22)      | 0.53 (0.31-0.90) | 0.65 (0.46-0.92) |
| Recent                                   | 0.78 (0.45-1.37)   | 0.69 (0.51-0.94)      | 0.58 (0.33-1.02) | 0.71 (0.56-0.91) |
| Former                                   | 0.75 (0.54-1.04)   | 0.98 (0.85-1.13)      | 0.82 (0.64-1.06) | 0.95 (0.84-1.07) |
| <b>Unhealthy diet</b>                    |                    |                       |                  |                  |
| Ever                                     | 1.18 (0.86-1.63)   | 1.10 (0.79-1.44)      | 1.28 (0.95-1.72) | 1.18 (0.99-1.41) |
| Current                                  | 0.61 (0.19-1.97)   | 1.55 (0.77-3.12)      | 1.48 (0.85-2.55) | 1.45 (0.96-2.20) |
| Recent                                   | 1.11 (0.55-2.26)   | 1.21 (0.65-2.24)      | 1.22 (0.65-2.28) | 1.17 (0.81-1.70) |
| Former                                   | 1.26 (0.88-1.80)   | 0.96 (0.67-1.38)      | 1.23 (0.86-1.76) | 1.14 (0.92-1.40) |
| <b>No leisure time physical activity</b> |                    |                       |                  |                  |
| Ever                                     | 0.98 (0.87-1.11)   | 1.13 (1.04-1.21)      | 1.11 (1.03-1.21) | 1.12 (1.07-1.18) |
| Current                                  | 1.43 (1.05-1.96)   | 1.32 (1.09-1.58)      | 1.16 (1.00-1.36) | 1.33 (1.19-1.49) |
| Recent                                   | 1.12 (0.81-1.29)   | 1.18 (1.01-1.19)      | 1.28 (1.11-1.47) | 1.20 (1.09-1.33) |
| Former                                   | 0.93 (0.81-1.08)   | 1.09 (0.99-1.19)      | 1.05 (0.95-1.17) | 1.06 (1.00-1.13) |

Never use: Persons who never redeemed a prescription for a systemic glucocorticoid before completing the questionnaire. Ever use: At least one redemption of a prescription for a systemic glucocorticoid before completing the questionnaire. Current use: Redemption of a prescription for a systemic glucocorticoid  $\leq 90$  days before completing the questionnaire. Recent use: Redemption of a prescription for a systemic glucocorticoid 91-365 days before completing the questionnaire. Former use: Redemption of a prescription for a systemic glucocorticoid  $> 365$  days before completing the questionnaire.

**Supplementary Table 7. Prevalence ratios (PRs) and 95% confidence intervals (CIs) for lifestyle factors comparing glucocorticoid users to never users in men, stratified by age group.**

| Category                                 | PR (95% CI)        |                       |                  |                  |
|------------------------------------------|--------------------|-----------------------|------------------|------------------|
|                                          | 25-44 years of age | 45 to 64 years of age | ≥65 years of age | All              |
| <b>Obesity</b>                           |                    |                       |                  |                  |
| Ever                                     | 1.13 (0.80-1.33)   | 1.30 (1.11-1.52)      | 1.22 (0.96-1.54) | 1.19 (1.05-1.34) |
| Current                                  | 1.12 (0.41-2.54)   | 1.29 (0.84-1.98)      | 1.46 (0.94-2.27) | 1.27 (0.95-1.71) |
| Recent                                   | 0.83 (0.50-1.38)   | 1.23 (0.85-1.79)      | 0.91 (0.51-1.62) | 0.99 (0.75-1.29) |
| Former                                   | 1.12 (0.83-1.51)   | 1.32 (1.10-1.59)      | 1.22 (0.92-1.62) | 1.23 (1.07-1.42) |
| <b>Smoking</b>                           |                    |                       |                  |                  |
| Ever                                     | 1.12 (1.00-1.25)   | 1.11 (1.06-1.18)      | 1.08 (1.02-1.14) | 1.17 (1.12-1.22) |
| Current                                  | 1.47 (1.12-1.91)   | 1.15 (0.99-1.33)      | 1.02 (0.90-1.15) | 1.26 (1.16-1.38) |
| Recent                                   | 1.16 (0.95-1.41)   | 1.05 (0.93-1.19)      | 1.11 (0.99-1.24) | 1.12 (1.02-1.22) |
| Former                                   | 1.05 (0.92-1.21)   | 1.13 (1.06-1.20)      | 1.09 (1.03-1.16) | 1.17 (1.11-1.22) |
| <b>High risk alcohol consumption</b>     |                    |                       |                  |                  |
| Ever                                     | 1.16 (0.92-1.47)   | 0.95 (0.82-1.10)      | 1.04 (0.86-1.26) | 1.06 (0.96-1.18) |
| Current                                  | 1.16 (0.54-2.51)   | 1.19 (0.84-1.69)      | 0.79 (0.51-1.22) | 1.06 (0.82-1.38) |
| Recent                                   | 1.16 (0.76-1.77)   | 0.67 (0.46-0.97)      | 1.22 (0.85-1.77) | 0.97 (0.77-1.22) |
| Former                                   | 1.17 (0.88-1.55)   | 0.98 (0.83-1.16)      | 1.08 (0.86-1.36) | 1.10 (0.96-1.24) |
| <b>Unhealthy diet</b>                    |                    |                       |                  |                  |
| Ever                                     | 1.00 (0.79-1.27)   | 1.02 (0.83-1.24)      | 0.93 (0.72-1.19) | 0.97 (0.85-1.11) |
| Current                                  | 1.22 (1.07-1.69)   | 1.04 (0.61-1.77)      | 1.41 (0.94-2.11) | 1.01 (0.73-1.38) |
| Recent                                   | 1.25 (0.85-1.84)   | 0.69 (0.41-1.19)      | 0.73 (0.43-1.24) | 0.96 (0.72-1.27) |
| Former                                   | 0.98 (0.74-1.31)   | 1.09 (0.88-1.37)      | 0.82 (0.59-1.15) | 0.97 (0.83-1.13) |
| <b>No leisure time physical activity</b> |                    |                       |                  |                  |
| Ever                                     | 1.02 (0.90-1.16)   | 1.03 (0.96-1.10)      | 1.06 (0.98-1.14) | 1.09 (1.03-1.14) |
| Current                                  | 1.17 (0.79-1.73)   | 1.21 (1.04-1.42)      | 1.18 (1.04-1.34) | 1.31 (1.19-1.45) |
| Recent                                   | 1.10 (0.87-1.37)   | 0.97 (0.82-1.15)      | 1.07 (0.91-1.25) | 1.05 (0.94-1.18) |
| Former                                   | 0.96 (0.82-1.13)   | 1.01 (0.93-1.10)      | 1.01 (0.92-1.11) | 1.05 (0.98-1.12) |

Never use: Persons who never redeemed a prescription for a systemic glucocorticoid before completing the questionnaire. Ever use: At least one redemption of a prescription for a systemic glucocorticoid before completing the questionnaire. Current use: Redemption of a prescription for a systemic glucocorticoid  $\leq$  90 days before completing the questionnaire. Recent use: Redemption of a prescription for a systemic glucocorticoid 91-365 days before completing the questionnaire. Former use: Redemption of a prescription for a systemic glucocorticoid  $>$  365 days before completing the questionnaire.
